# Supplementary material
Source: Research Square preprint supplement (doi:10.21203/rs.3.rs-9213027/v1)
Supplement: Supplementary file 1 [file 66837e6d35be5d827ef8b7fd.pdf]

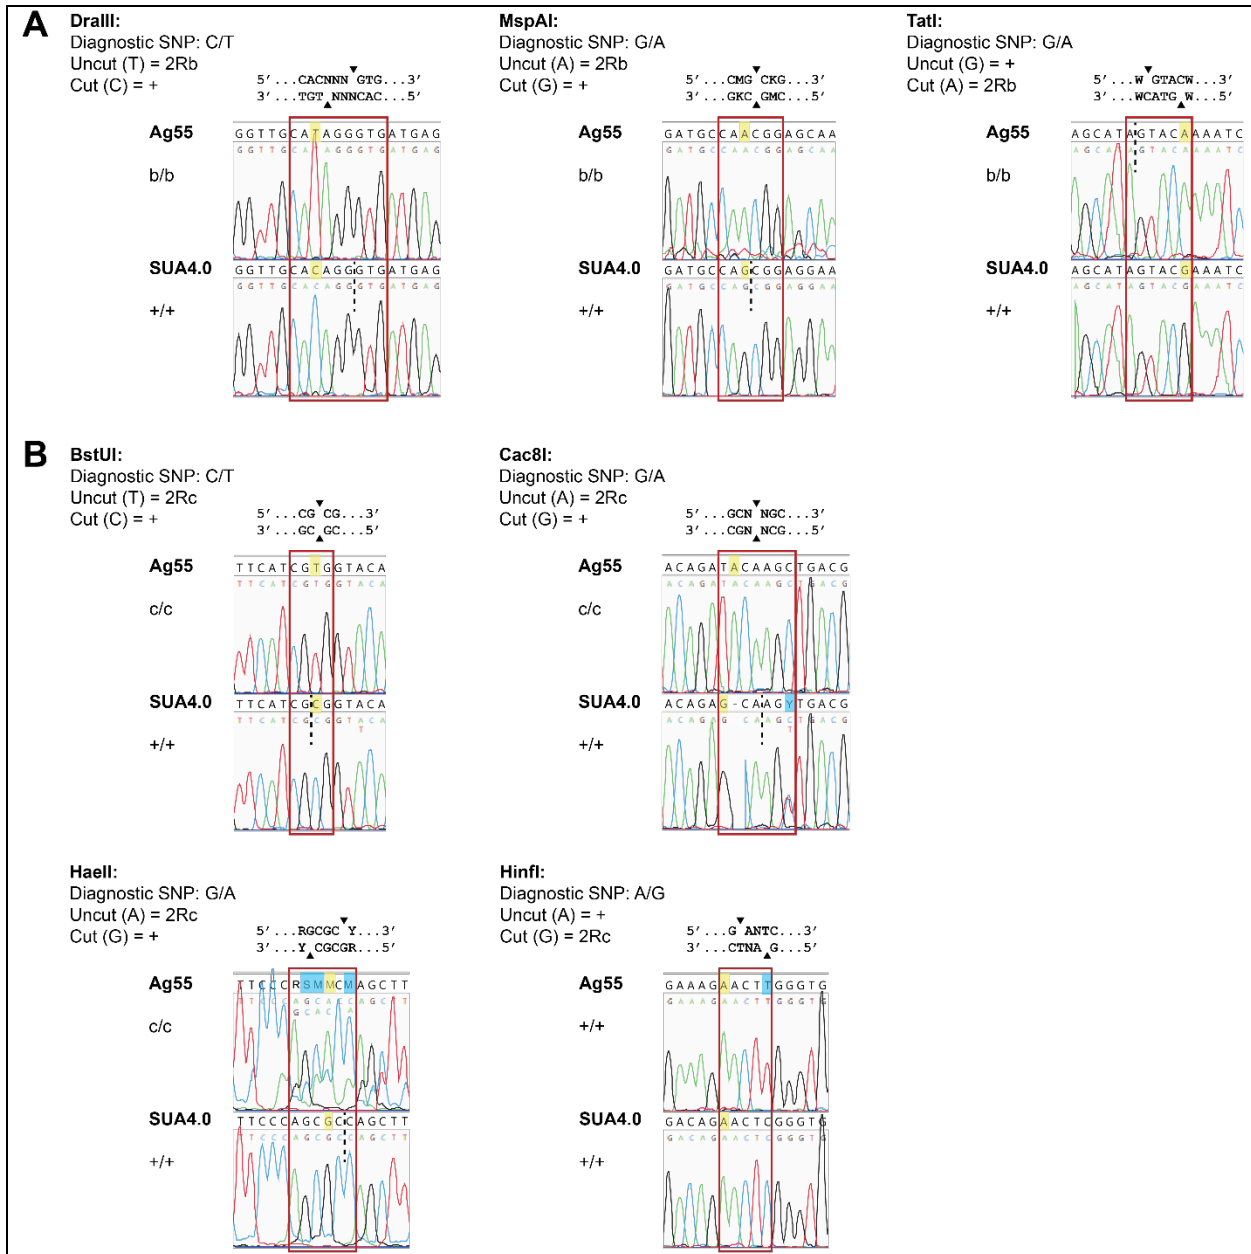

**Figure S1. Molecular karyotyping assays of 2Rb and 2Rc on Ag55 and SUA4.0 cell lines. A-B** Ag55 and SUA4.0 cells were karyotyped for 2Rb (A) and 2Rc (B) using primers designed for previously published RFLPs for molecular karyotyping. PCR products were sequenced to identify the diagnostic SNP utilized by the RFLP assays. The diagnostic SNP (also highlighted in yellow on each electropherogram) and the inversion karyotype for cut vs uncut product are listed for each restriction enzyme. Ag55 electropherograms are shown above SUA4.0, and the concluded inversion karyotype for each diagnostic test is shown to the left of the electropherograms. The restriction enzyme recognition sites are shown above the electropherograms, with black triangles indicating cut sites. The red box over the electropherograms highlights the restriction enzyme recognition site, and a dotted black line indicates where diagnostic cutting would occur. Nucleotides highlighted in blue indicate additional SNPs within the restriction enzyme recognition sequence that destroy the site. The single nucleotide peak for each diagnostic SNP indicates homozygosity for the inversion

karyotypes. In the case of HaeII for 2Rb, neither of the two nucleotides in Ag55 at the diagnostic SNP would result in cutting. **(A)** All three tests for 2Rb (DraIII, MspAI, TatI) concur that Ag55 is b/b and SUA4.0 is +/+. **(B)** Three of the four tests for 2Rc (BstUI, Cac8I, HaeII) concur that Ag55 is c/c and SUA4.0 is +/+.

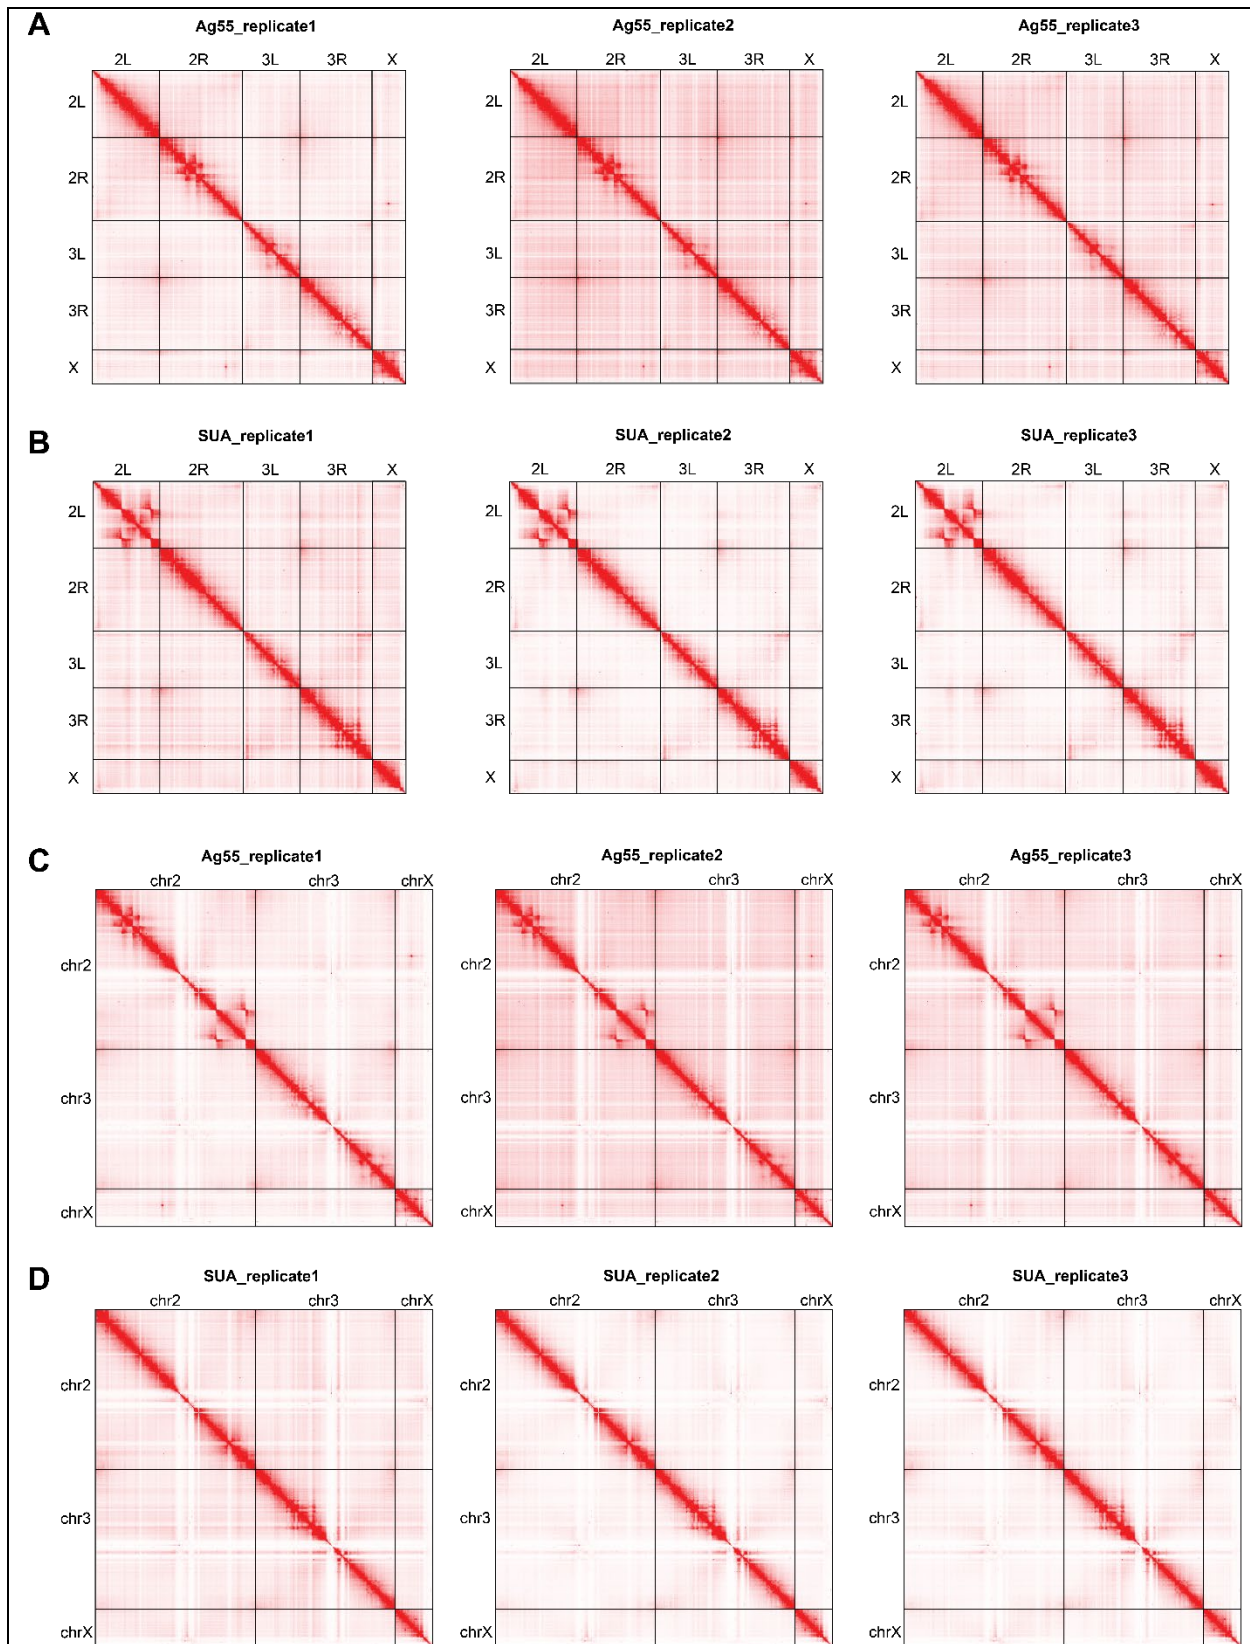

**Figure S2. Contact matrices for all replicates mapped to both PEST 2L<sup>a</sup> and MOPTI 2La reference genomes. Micro-C libraries were made from three biological replicates of**

Ag55 cells which are fixed for 2L+<sup>a</sup> (**A, C**) and three biological replicates of SUA4.0 cells which are fixed for 2La (**B, D**), and reads were mapped to PEST 2L+<sup>a</sup> (**A, B**) or MOPTI 2La (**C, D**) reference genomes. The PEST reference genome splits chromosomes 2 and 3 into their L and R arms while the MOPTI reference genome includes the L and R arms in chromosomes 2 and 3. All three replicates of each cell line produce highly similar contact matrices.

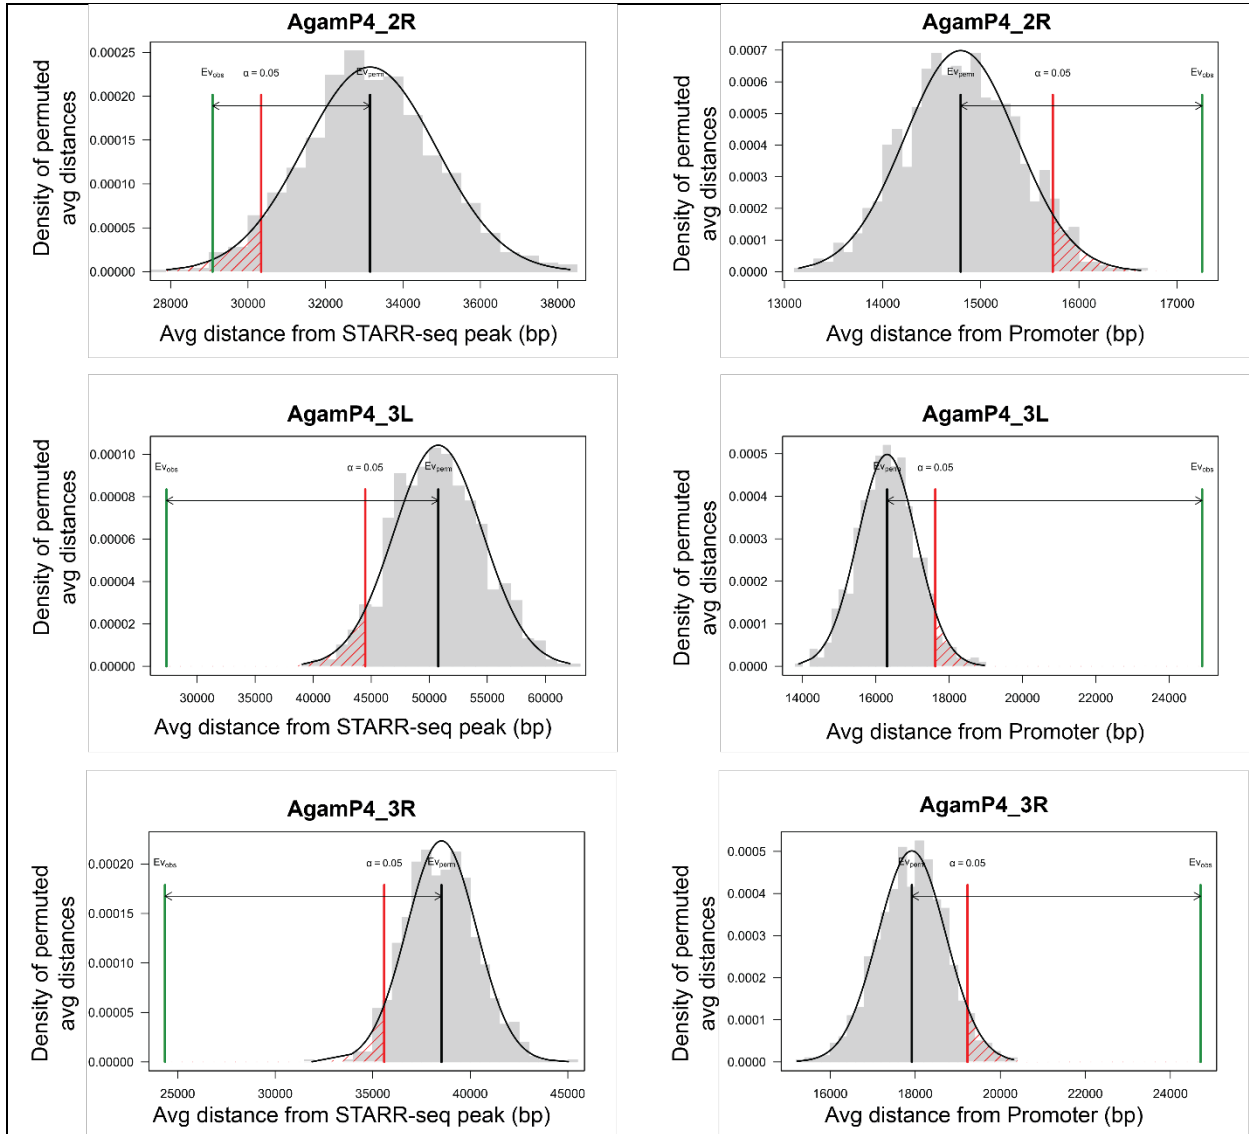

**Figure S3. Chromatin interaction hubs are located nearby enhancers rather than promoters on *Anopheles coluzzii* autosomal arms.** For each autosomal arm, permutation testing was performed using R package regioneR to assess whether the identified interaction hubs were closer to or farther from enhancers or promoters than expected by random chance. The permTest meanDistance function was used, interaction hubs were set as region set A, and either enhancers (detected in at least 2 of 3 replicates of a previous STARR-seq experiment) or promoters (defined as the 1000bp region upstream of the protein coding gene as described by VEuPathDB) were set as region set B. The PEST reference genome was manually set, and the randomizeRegions function was used to perform 1000 permutation

tests, creating the null distribution (gray histogram and black bell curve) whose average distance to nearest STARR-seq peak/promoter is highlighted by the black line ( $Ev_{perm}$  = mean of the randomized permutations). The red line and red shading represent the significance limit, set to  $p=0.05$ . The green line is the average distance between interaction hub and nearest STARR-seq peak/promoter ( $Ev_{obs}$  = mean of the observed region set). The average distance between an interaction hub and the nearest STARR-seq peak was significantly smaller compared to a random null distribution, evidenced by the green line being to the left of the red line, indicating that interaction hubs are closer to enhancer than expected by random chance in chromosomes AgamP4\_2R (z-score -2.377, p-value 0.006), AgamP4\_3L (z-score -6.122, p-value 0.001), and AgamP4\_3R (z-score -7.937, p-value 0.001). The average distance between an interaction hub and the nearest promoter was significantly larger compared to a random null distribution, evidenced by the green line being to the right of the red line, indicating that interaction hubs are farther from promoters than expected by random chance in chromosomes AgamP4\_2R (z-score 4.309, p-value 0.001), AgamP4\_3L (z-score 10.738, p-value 0.001), and AgamP4\_3R (z-score 8.529, p-value 0.001). Results are consistent across all *Anopheles coluzzii* autosomal arms.

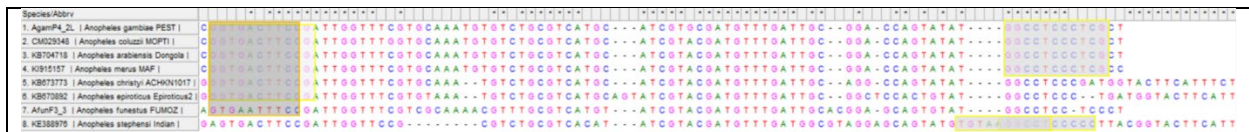

**Figure S4. Alignment of the conserved region within the newly identified regulatory region of LRIM1.** Sequences with significant ( $p<0.01$ ) similarity to the Relish binding site at the 5' and 3' end of the sequence are shown in yellow bounded light gray shaded boxes. Sequences with significant similarity to the Dif binding site at the 5' end of the sequence are outlined in orange and shaded in dark gray. At the 5' end of the sequence, the Relish and Dif similar sites overlap for all species other than *A. funestus*, which only displays similarity to the Dif binding site. At the 3' end of the sequence, *A. stephensi* and the members of the species complex have significant similarity to the Relish TFBS.

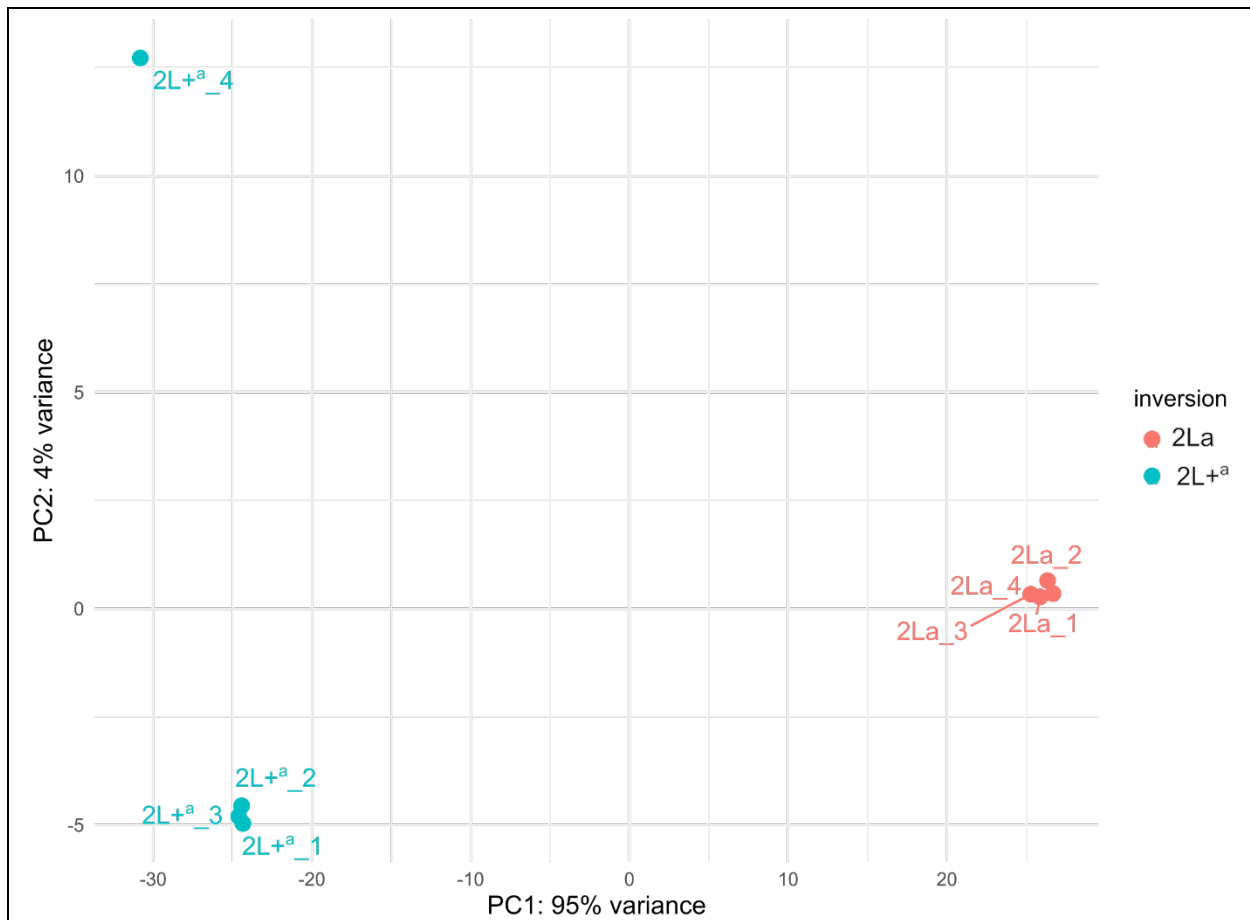

**Figure S5. Prioritization of samples for Micro-C by PCA analysis of the 4 bulk RNA-seq replicates.** RNA-seq data were rlog-transformed using DESeq2 (blind=TRUE) prior to principal component analysis. PCA analysis was performed using the plotPCA function in DESeq2, with samples grouped by inversion karyotype. The percentage of variance explained by each principal component was extracted and plotted using ggplot2. Replicates 1,2, and 3 were used in Micro-C experiment. Note, for all replicates, samples were simultaneously prepped for bulk RNA-seq and Micro-C.

**TableS1. Top 4 DAVID Clusters of the 477 differentially expressed genes on chromosome 2L between 2La and 2L+ cell lines**

Annotation Enrichment Score: 3.7183858953992237

| Category | Term      | Count | %        | PValue   | Genes    | List Total | Pop Hits | Pop Total | Fold Enrich | Bonferroni | Benjamini | FDR      |
|----------|-----------|-------|----------|----------|----------|------------|----------|-----------|-------------|------------|-----------|----------|
| GOTERM   | GO:001501 | 6     | 1.263158 | 1.16E-04 | AGAP0075 | 345        | 16       | 10549     | 11.4663     | 0.035966   | 0.036626  | 0.036626 |
| INTERPRO | IPR002213 | 7     | 1.473684 | 1.60E-04 | AGAP0075 | 398        | 26       | 12077     | 8.169598    | 0.166939   | 0.091317  | 0.091317 |
| INTERPRO | IPR050271 | 7     | 1.473684 | 1.60E-04 | AGAP0075 | 398        | 26       | 12077     | 8.169598    | 0.166939   | 0.091317  | 0.091317 |
| GOTERM   | GO:000818 | 7     | 1.473684 | 2.90E-04 | AGAP0075 | 345        | 29       | 10549     | 7.38061     | 0.087178   | 0.045601  | 0.045601 |
| INTERPRO | IPR035595 | 6     | 1.263158 | 2.97E-04 | AGAP0075 | 398        | 19       | 12077     | 9.582386    | 0.287848   | 0.113138  | 0.113138 |

Annotation Enrichment Score: 2.4366385413970386

| Category | Term     | Count | %        | PValue   | Genes    | List Total | Pop Hits | Pop Total | Fold Enrich | Bonferroni | Benjamini | FDR      |
|----------|----------|-------|----------|----------|----------|------------|----------|-----------|-------------|------------|-----------|----------|
| KEGG_PAT | aga01232 | 9     | 1.894737 | 1.53E-04 | AGAP0062 | 124        | 51       | 3923      | 5.583017    | 0.015152   | 0.015266  | 0.015114 |
| KEGG_PAT | aga00230 | 9     | 1.894737 | 0.004089 | AGAP0062 | 124        | 83       | 3923      | 3.430529    | 0.336175   | 0.1363    | 0.134937 |
| KEGG_PAT | aga00760 | 3     | 0.631579 | 0.078475 | AGAP0077 | 124        | 15       | 3923      | 6.327419    | 0.999718   | 0.603655  | 0.597618 |

Annotation Enrichment Score: 2.1120389828737203

| Category  | Term      | Count | %        | PValue   | Genes    | List Total | Pop Hits | Pop Total | Fold Enrich | Bonferroni | Benjamini | FDR      |
|-----------|-----------|-------|----------|----------|----------|------------|----------|-----------|-------------|------------|-----------|----------|
| INTERPRO  | IPR042178 | 5     | 1.052632 | 0.003011 | AGAP0069 | 398        | 19       | 12077     | 7.985321    | 0.968068   | 0.573157  | 0.573157 |
| INTERPRO  | IPR023796 | 5     | 1.052632 | 0.003011 | AGAP0069 | 398        | 19       | 12077     | 7.985321    | 0.968068   | 0.573157  | 0.573157 |
| INTERPRO  | IPR000215 | 5     | 1.052632 | 0.003011 | AGAP0069 | 398        | 19       | 12077     | 7.985321    | 0.968068   | 0.573157  | 0.573157 |
| SMART     | SM000933  | 5     | 1.052632 | 0.00307  | AGAP0069 | 188        | 19       | 5639      | 7.893337    | 0.357718   | 0.442049  | 0.442049 |
| INTERPRO  | IPR036186 | 5     | 1.052632 | 0.003668 | AGAP0069 | 398        | 20       | 12077     | 7.586055    | 0.984948   | 0.598367  | 0.598367 |
| INTERPRO  | IPR023795 | 4     | 0.842105 | 0.004778 | AGAP0069 | 398        | 11       | 12077     | 11.03426    | 0.995785   | 0.681993  | 0.681993 |
| GOTERM    | GO:005077 | 4     | 0.842105 | 0.005822 | AGAP0069 | 304        | 12       | 9431      | 10.34101    | 0.92251    | 0.637537  | 0.637537 |
| UP_KW_M   | KW-0722~  | 5     | 1.052632 | 0.007297 | AGAP0069 | 149        | 25       | 4669      | 6.267114    | 0.33155    | 0.401323  | 0.401323 |
| INTERPRO  | IPR042185 | 4     | 0.842105 | 0.0231   | AGAP0069 | 398        | 19       | 12077     | 6.388257    | 1          | 1         | 1        |
| UP_SEQ_FI | DOMAIN:S  | 4     | 0.842105 | 0.023705 | AGAP0069 | 390        | 18       | 11075     | 6.310541    | 0.999677   | 1         | 1        |
| GOTERM    | GO:000486 | 5     | 1.052632 | 0.02879  | AGAP0069 | 345        | 36       | 10549     | 4.246779    | 0.999899   | 1         | 1        |
| UP_KW_M   | KW-0646~  | 5     | 1.052632 | 0.045987 | AGAP0069 | 149        | 43       | 4669      | 3.643671    | 0.924925   | 0.843087  | 0.843087 |

Annotation Enrichment Score: 1.2408652790891135

| Category | Term      | Count | %        | PValue   | Genes    | List Total | Pop Hits | Pop Total | Fold Enrich | Bonferroni | Benjamini | FDR |
|----------|-----------|-------|----------|----------|----------|------------|----------|-----------|-------------|------------|-----------|-----|
| UP_KW_BI | KW-0399~  | 10    | 2.105263 | 0.02985  | AGAP0052 | 104        | 135      | 3165      | 2.254274    | 0.799335   | 1         | 1   |
| UP_KW_BI | KW-0391~  | 10    | 2.105263 | 0.062856 | AGAP0052 | 104        | 155      | 3165      | 1.9634      | 0.967957   | 1         | 1   |
| GOTERM   | GO:004501 | 13    | 2.736842 | 0.100953 | AGAP0065 | 304        | 247      | 9431      | 1.632791    | 1          | 1         | 1   |

Bed file of STARR-seq enhancers detected in at least 2 of 3 replicates

|           |          |          |
|-----------|----------|----------|
| AgamP4_2R | 563534   | 564045   |
| AgamP4_2R | 755085   | 755587   |
| AgamP4_2R | 933953   | 934453   |
| AgamP4_2R | 1038833  | 1039417  |
| AgamP4_2R | 1320859  | 1321362  |
| AgamP4_2R | 1384095  | 1384603  |
| AgamP4_2R | 1439707  | 1440206  |
| AgamP4_2R | 1664442  | 1664947  |
| AgamP4_2R | 2219531  | 2220076  |
| AgamP4_2R | 2499665  | 2500317  |
| AgamP4_2R | 2657043  | 2657542  |
| AgamP4_2R | 3000893  | 3001396  |
| AgamP4_2R | 3005956  | 3006463  |
| AgamP4_2R | 3026912  | 3027429  |
| AgamP4_2R | 3485700  | 3486265  |
| AgamP4_2R | 3626375  | 3626897  |
| AgamP4_2R | 3810283  | 3810930  |
| AgamP4_2R | 3871241  | 3871788  |
| AgamP4_2R | 4089361  | 4089891  |
| AgamP4_2R | 4496269  | 4496852  |
| AgamP4_2R | 4664786  | 4665292  |
| AgamP4_2R | 4932816  | 4933451  |
| AgamP4_2R | 4956326  | 4956825  |
| AgamP4_2R | 5376035  | 5376538  |
| AgamP4_2R | 5518460  | 5518999  |
| AgamP4_2R | 5705951  | 5706450  |
| AgamP4_2R | 5763264  | 5763776  |
| AgamP4_2R | 5788155  | 5788775  |
| AgamP4_2R | 6323629  | 6324151  |
| AgamP4_2R | 6509130  | 6509636  |
| AgamP4_2R | 7472528  | 7473036  |
| AgamP4_2R | 7538484  | 7539071  |
| AgamP4_2R | 7859443  | 7859946  |
| AgamP4_2R | 8281805  | 8282304  |
| AgamP4_2R | 8447678  | 8448181  |
| AgamP4_2R | 8450334  | 8450886  |
| AgamP4_2R | 8464435  | 8464944  |
| AgamP4_2R | 9042485  | 9042988  |
| AgamP4_2R | 9226265  | 9226812  |
| AgamP4_2R | 9579108  | 9579730  |
| AgamP4_2R | 10588496 | 10589009 |
| AgamP4_2R | 10663144 | 10663644 |
| AgamP4_2R | 10984846 | 10985442 |
| AgamP4_2R | 11677724 | 11678252 |
| AgamP4_2R | 11831420 | 11831931 |
| AgamP4_2R | 11903913 | 11904455 |
| AgamP4_2R | 12231450 | 12231998 |
| AgamP4_2R | 12369086 | 12369620 |

|           |          |          |
|-----------|----------|----------|
| AgamP4_2R | 12726929 | 12727601 |
| AgamP4_2R | 12929103 | 12929647 |
| AgamP4_2R | 13272978 | 13273477 |
| AgamP4_2R | 13311983 | 13312482 |
| AgamP4_2R | 14120298 | 14120819 |
| AgamP4_2R | 14727234 | 14727733 |
| AgamP4_2R | 15174555 | 15175059 |
| AgamP4_2R | 15259026 | 15259525 |
| AgamP4_2R | 15512581 | 15513080 |
| AgamP4_2R | 15789657 | 15790171 |
| AgamP4_2R | 15909641 | 15910166 |
| AgamP4_2R | 16017048 | 16017554 |
| AgamP4_2R | 16104378 | 16104883 |
| AgamP4_2R | 16560571 | 16561070 |
| AgamP4_2R | 16690183 | 16690716 |
| AgamP4_2R | 16970480 | 16971006 |
| AgamP4_2R | 17060027 | 17060535 |
| AgamP4_2R | 17488871 | 17489382 |
| AgamP4_2R | 17788080 | 17788594 |
| AgamP4_2R | 17807604 | 17808110 |
| AgamP4_2R | 18244216 | 18244730 |
| AgamP4_2R | 18394785 | 18395297 |
| AgamP4_2R | 18753432 | 18753938 |
| AgamP4_2R | 19135071 | 19135574 |
| AgamP4_2R | 19175917 | 19176417 |
| AgamP4_2R | 19283740 | 19284328 |
| AgamP4_2R | 19611792 | 19612336 |
| AgamP4_2R | 19760289 | 19760800 |
| AgamP4_2R | 20194705 | 20195269 |
| AgamP4_2R | 20456939 | 20457442 |
| AgamP4_2R | 20506159 | 20506658 |
| AgamP4_2R | 20584123 | 20584657 |
| AgamP4_2R | 21084506 | 21085056 |
| AgamP4_2R | 21123317 | 21123829 |
| AgamP4_2R | 21427570 | 21428230 |
| AgamP4_2R | 21751654 | 21752163 |
| AgamP4_2R | 21882935 | 21883434 |
| AgamP4_2R | 21973305 | 21973816 |
| AgamP4_2R | 21990802 | 21991321 |
| AgamP4_2R | 22117553 | 22118062 |
| AgamP4_2R | 22296021 | 22296533 |
| AgamP4_2R | 22499221 | 22499729 |
| AgamP4_2R | 22820830 | 22821345 |
| AgamP4_2R | 22845327 | 22845835 |
| AgamP4_2R | 23139275 | 23139791 |
| AgamP4_2R | 23370158 | 23370704 |
| AgamP4_2R | 23498109 | 23498626 |
| AgamP4_2R | 23830166 | 23830670 |
| AgamP4_2R | 24474173 | 24474773 |
| AgamP4_2R | 24500070 | 24500580 |

|           |          |          |
|-----------|----------|----------|
| AgamP4_2R | 24573785 | 24574400 |
| AgamP4_2R | 24762848 | 24763363 |
| AgamP4_2R | 25099398 | 25100055 |
| AgamP4_2R | 25162263 | 25162765 |
| AgamP4_2R | 25317122 | 25317624 |
| AgamP4_2R | 25412203 | 25412822 |
| AgamP4_2R | 25442175 | 25442695 |
| AgamP4_2R | 25488703 | 25489250 |
| AgamP4_2R | 25804791 | 25805296 |
| AgamP4_2R | 25921761 | 25922268 |
| AgamP4_2R | 26137655 | 26138230 |
| AgamP4_2R | 26180138 | 26180875 |
| AgamP4_2R | 26296202 | 26296701 |
| AgamP4_2R | 26396114 | 26396626 |
| AgamP4_2R | 26443651 | 26444151 |
| AgamP4_2R | 26864147 | 26864658 |
| AgamP4_2R | 27358050 | 27358560 |
| AgamP4_2R | 27594935 | 27595534 |
| AgamP4_2R | 27853867 | 27854368 |
| AgamP4_2R | 27959593 | 27960149 |
| AgamP4_2R | 28016526 | 28017040 |
| AgamP4_2R | 28045521 | 28046054 |
| AgamP4_2R | 28241550 | 28242050 |
| AgamP4_2R | 28480814 | 28481389 |
| AgamP4_2R | 28494910 | 28495430 |
| AgamP4_2R | 28704860 | 28705363 |
| AgamP4_2R | 28840739 | 28841322 |
| AgamP4_2R | 28914198 | 28914790 |
| AgamP4_2R | 28941696 | 28942253 |
| AgamP4_2R | 29297118 | 29297800 |
| AgamP4_2R | 29523374 | 29523897 |
| AgamP4_2R | 29548439 | 29549081 |
| AgamP4_2R | 29812985 | 29813488 |
| AgamP4_2R | 29897733 | 29898274 |
| AgamP4_2R | 30235284 | 30235895 |
| AgamP4_2R | 30240096 | 30240616 |
| AgamP4_2R | 30311500 | 30312000 |
| AgamP4_2R | 30337837 | 30338352 |
| AgamP4_2R | 30530534 | 30531044 |
| AgamP4_2R | 30570666 | 30571169 |
| AgamP4_2R | 30781031 | 30781531 |
| AgamP4_2R | 30996872 | 30997374 |
| AgamP4_2R | 31024814 | 31025316 |
| AgamP4_2R | 31141224 | 31141739 |
| AgamP4_2R | 31239501 | 31240095 |
| AgamP4_2R | 31246163 | 31246663 |
| AgamP4_2R | 31439095 | 31439596 |
| AgamP4_2R | 31662702 | 31663265 |
| AgamP4_2R | 32065883 | 32066445 |
| AgamP4_2R | 32443052 | 32443551 |

|           |          |          |
|-----------|----------|----------|
| AgamP4_2R | 32784074 | 32784611 |
| AgamP4_2R | 33190405 | 33190939 |
| AgamP4_2R | 33628150 | 33628668 |
| AgamP4_2R | 33668333 | 33668898 |
| AgamP4_2R | 33693467 | 33694073 |
| AgamP4_2R | 34019987 | 34020487 |
| AgamP4_2R | 34254265 | 34254767 |
| AgamP4_2R | 34318611 | 34319195 |
| AgamP4_2R | 34607323 | 34607849 |
| AgamP4_2R | 34608320 | 34608859 |
| AgamP4_2R | 35004500 | 35005025 |
| AgamP4_2R | 35029774 | 35030304 |
| AgamP4_2R | 35196045 | 35196548 |
| AgamP4_2R | 35243567 | 35244066 |
| AgamP4_2R | 35296771 | 35297273 |
| AgamP4_2R | 35307180 | 35307773 |
| AgamP4_2R | 35314894 | 35315406 |
| AgamP4_2R | 35715136 | 35715696 |
| AgamP4_2R | 35994386 | 35994885 |
| AgamP4_2R | 36053527 | 36054120 |
| AgamP4_2R | 36313732 | 36314244 |
| AgamP4_2R | 36332117 | 36332622 |
| AgamP4_2R | 36333385 | 36333903 |
| AgamP4_2R | 36493145 | 36493649 |
| AgamP4_2R | 36714726 | 36715387 |
| AgamP4_2R | 36877694 | 36878207 |
| AgamP4_2R | 36920788 | 36921316 |
| AgamP4_2R | 36974485 | 36974989 |
| AgamP4_2R | 36994005 | 36994555 |
| AgamP4_2R | 37121482 | 37122006 |
| AgamP4_2R | 37290178 | 37290685 |
| AgamP4_2R | 37716419 | 37716950 |
| AgamP4_2R | 37933263 | 37933762 |
| AgamP4_2R | 38404230 | 38404733 |
| AgamP4_2R | 38522096 | 38522596 |
| AgamP4_2R | 39004673 | 39005212 |
| AgamP4_2R | 39564308 | 39564937 |
| AgamP4_2R | 39751808 | 39752321 |
| AgamP4_2R | 39854030 | 39854603 |
| AgamP4_2R | 39951022 | 39951560 |
| AgamP4_2R | 40870942 | 40871528 |
| AgamP4_2R | 40909662 | 40910345 |
| AgamP4_2R | 40990366 | 40990870 |
| AgamP4_2R | 41167294 | 41167798 |
| AgamP4_2R | 41907381 | 41907902 |
| AgamP4_2R | 42288290 | 42288789 |
| AgamP4_2R | 42315352 | 42315851 |
| AgamP4_2R | 42324984 | 42325520 |
| AgamP4_2R | 42644937 | 42645443 |
| AgamP4_2R | 43162209 | 43162717 |

|           |          |          |
|-----------|----------|----------|
| AgamP4_2R | 43452979 | 43453484 |
| AgamP4_2R | 43983216 | 43983732 |
| AgamP4_2R | 44268015 | 44268517 |
| AgamP4_2R | 44376618 | 44377120 |
| AgamP4_2R | 44858620 | 44859131 |
| AgamP4_2R | 45181463 | 45181995 |
| AgamP4_2R | 45995531 | 45996030 |
| AgamP4_2R | 46138085 | 46138586 |
| AgamP4_2R | 46167702 | 46168206 |
| AgamP4_2R | 46342553 | 46343123 |
| AgamP4_2R | 46562184 | 46562833 |
| AgamP4_2R | 47246581 | 47247081 |
| AgamP4_2R | 47315823 | 47316325 |
| AgamP4_2R | 47880110 | 47880652 |
| AgamP4_2R | 48412721 | 48413230 |
| AgamP4_2R | 48507089 | 48507606 |
| AgamP4_2R | 48568191 | 48568703 |
| AgamP4_2R | 48662016 | 48662532 |
| AgamP4_2R | 49235283 | 49235782 |
| AgamP4_2R | 49316096 | 49316597 |
| AgamP4_2R | 49831536 | 49832083 |
| AgamP4_2R | 50149194 | 50149700 |
| AgamP4_2R | 50227461 | 50227963 |
| AgamP4_2R | 50577057 | 50577637 |
| AgamP4_2R | 50946876 | 50947436 |
| AgamP4_2R | 50998884 | 50999392 |
| AgamP4_2R | 51180731 | 51181230 |
| AgamP4_2R | 51186639 | 51187158 |
| AgamP4_2R | 51570516 | 51571040 |
| AgamP4_2R | 52128602 | 52129101 |
| AgamP4_2R | 52702660 | 52703166 |
| AgamP4_2R | 52709509 | 52710036 |
| AgamP4_2R | 52941658 | 52942221 |
| AgamP4_2R | 53051525 | 53052069 |
| AgamP4_2R | 53207350 | 53207872 |
| AgamP4_2R | 53418206 | 53418705 |
| AgamP4_2R | 53698997 | 53699611 |
| AgamP4_2R | 54116982 | 54117617 |
| AgamP4_2R | 54719528 | 54720050 |
| AgamP4_2R | 54908175 | 54908719 |
| AgamP4_2R | 54990186 | 54990717 |
| AgamP4_2R | 55237274 | 55237885 |
| AgamP4_2R | 55712210 | 55712741 |
| AgamP4_2R | 56647227 | 56647756 |
| AgamP4_2R | 56710753 | 56711283 |
| AgamP4_2R | 57179720 | 57180219 |
| AgamP4_2R | 57614627 | 57615159 |
| AgamP4_2R | 59536164 | 59536665 |
| AgamP4_2L | 62501    | 63000    |
| AgamP4_2L | 340346   | 340859   |

|           |          |         |          |
|-----------|----------|---------|----------|
| AgamP4_2L | 876548   | 877085  |          |
| AgamP4_2L | 3432928  | 3433436 |          |
| AgamP4_2L | 3652502  | 3653024 |          |
| AgamP4_2L | 3760390  | 3760965 |          |
| AgamP4_2L | 3771171  | 3771672 |          |
| AgamP4_2L | 4148448  | 4148954 |          |
| AgamP4_2L | 4340238  | 4340739 |          |
| AgamP4_2L | 4825159  | 4825702 |          |
| AgamP4_2L | 5014959  | 5015459 |          |
| AgamP4_2L | 5192641  | 5193142 |          |
| AgamP4_2L | 6039585  | 6040095 |          |
| AgamP4_2L | 6734505  | 6735010 |          |
| AgamP4_2L | 8105799  | 8106310 |          |
| AgamP4_2L | 8267342  | 8267899 |          |
| AgamP4_2L | 9043347  | 9043853 |          |
| AgamP4_2L | 9473800  | 9474299 |          |
| AgamP4_2L | 9841426  | 9841992 |          |
| AgamP4_2L | 9874340  | 9874870 |          |
| AgamP4_2L | 10798080 |         | 10798581 |
| AgamP4_2L | 11319808 |         | 11320308 |
| AgamP4_2L | 11654552 |         | 11655054 |
| AgamP4_2L | 11850127 |         | 11850683 |
| AgamP4_2L | 11886420 |         | 11886928 |
| AgamP4_2L | 11978291 |         | 11978802 |
| AgamP4_2L | 12621384 |         | 12621962 |
| AgamP4_2L | 12779513 |         | 12780028 |
| AgamP4_2L | 12905825 |         | 12906329 |
| AgamP4_2L | 12937208 |         | 12937737 |
| AgamP4_2L | 13195635 |         | 13196153 |
| AgamP4_2L | 13237404 |         | 13237931 |
| AgamP4_2L | 13298937 |         | 13299453 |
| AgamP4_2L | 13484574 |         | 13485082 |
| AgamP4_2L | 13534357 |         | 13534950 |
| AgamP4_2L | 13561489 |         | 13561999 |
| AgamP4_2L | 14287459 |         | 14287967 |
| AgamP4_2L | 14390887 |         | 14391407 |
| AgamP4_2L | 14629156 |         | 14629659 |
| AgamP4_2L | 14765940 |         | 14766440 |
| AgamP4_2L | 15004311 |         | 15004874 |
| AgamP4_2L | 15372063 |         | 15372572 |
| AgamP4_2L | 15548149 |         | 15548657 |
| AgamP4_2L | 16339181 |         | 16339688 |
| AgamP4_2L | 16573391 |         | 16573906 |
| AgamP4_2L | 17247598 |         | 17248111 |
| AgamP4_2L | 17428513 |         | 17429097 |
| AgamP4_2L | 17446091 |         | 17446599 |
| AgamP4_2L | 17567685 |         | 17568257 |
| AgamP4_2L | 17729812 |         | 17730389 |
| AgamP4_2L | 17749672 |         | 17750172 |
| AgamP4_2L | 17794521 |         | 17795058 |

|           |          |          |
|-----------|----------|----------|
| AgamP4_2L | 19530075 | 19530580 |
| AgamP4_2L | 19625687 | 19626300 |
| AgamP4_2L | 19947273 | 19947781 |
| AgamP4_2L | 20322528 | 20323033 |
| AgamP4_2L | 20483803 | 20484326 |
| AgamP4_2L | 20523182 | 20523766 |
| AgamP4_2L | 20797609 | 20798110 |
| AgamP4_2L | 21106231 | 21106738 |
| AgamP4_2L | 21454126 | 21454631 |
| AgamP4_2L | 21895190 | 21895779 |
| AgamP4_2L | 21918220 | 21918733 |
| AgamP4_2L | 22040769 | 22041381 |
| AgamP4_2L | 22326011 | 22326552 |
| AgamP4_2L | 22342039 | 22342546 |
| AgamP4_2L | 22924832 | 22925361 |
| AgamP4_2L | 23352365 | 23352920 |
| AgamP4_2L | 23472916 | 23473421 |
| AgamP4_2L | 23746730 | 23747413 |
| AgamP4_2L | 23907419 | 23907936 |
| AgamP4_2L | 24158283 | 24158819 |
| AgamP4_2L | 24214102 | 24214696 |
| AgamP4_2L | 24426605 | 24427179 |
| AgamP4_2L | 24702615 | 24703182 |
| AgamP4_2L | 25132256 | 25132804 |
| AgamP4_2L | 25519676 | 25520181 |
| AgamP4_2L | 25931407 | 25931919 |
| AgamP4_2L | 26204495 | 26205082 |
| AgamP4_2L | 26479516 | 26480053 |
| AgamP4_2L | 26562217 | 26562716 |
| AgamP4_2L | 26608791 | 26609345 |
| AgamP4_2L | 27538898 | 27539428 |
| AgamP4_2L | 27744451 | 27744957 |
| AgamP4_2L | 27901718 | 27902220 |
| AgamP4_2L | 28973991 | 28974508 |
| AgamP4_2L | 29005535 | 29006039 |
| AgamP4_2L | 29044625 | 29045323 |
| AgamP4_2L | 29105958 | 29106510 |
| AgamP4_2L | 29171006 | 29171511 |
| AgamP4_2L | 30301522 | 30302093 |
| AgamP4_2L | 30791012 | 30791526 |
| AgamP4_2L | 31655176 | 31655693 |
| AgamP4_2L | 32140594 | 32141116 |
| AgamP4_2L | 32396903 | 32397402 |
| AgamP4_2L | 32546949 | 32547455 |
| AgamP4_2L | 32774415 | 32774971 |
| AgamP4_2L | 32811821 | 32812321 |
| AgamP4_2L | 32917111 | 32917621 |
| AgamP4_2L | 33027110 | 33027664 |
| AgamP4_2L | 33184396 | 33184904 |
| AgamP4_2L | 33214282 | 33214895 |

|           |          |          |
|-----------|----------|----------|
| AgamP4_2L | 33227519 | 33228022 |
| AgamP4_2L | 34074806 | 34075353 |
| AgamP4_2L | 34444517 | 34445060 |
| AgamP4_2L | 34586881 | 34587380 |
| AgamP4_2L | 34741015 | 34741520 |
| AgamP4_2L | 34780022 | 34780528 |
| AgamP4_2L | 34886451 | 34887020 |
| AgamP4_2L | 35216357 | 35216856 |
| AgamP4_2L | 35378671 | 35379176 |
| AgamP4_2L | 35583348 | 35583878 |
| AgamP4_2L | 35975070 | 35975596 |
| AgamP4_2L | 36375919 | 36376426 |
| AgamP4_2L | 36486107 | 36486609 |
| AgamP4_2L | 36490775 | 36491400 |
| AgamP4_2L | 37093261 | 37093771 |
| AgamP4_2L | 37424004 | 37424524 |
| AgamP4_2L | 37531378 | 37532055 |
| AgamP4_2L | 37974555 | 37975061 |
| AgamP4_2L | 38224375 | 38224874 |
| AgamP4_2L | 38244851 | 38245396 |
| AgamP4_2L | 38447147 | 38447691 |
| AgamP4_2L | 39450460 | 39450977 |
| AgamP4_2L | 39551462 | 39551962 |
| AgamP4_2L | 39846569 | 39847086 |
| AgamP4_2L | 40196810 | 40197313 |
| AgamP4_2L | 40505245 | 40505798 |
| AgamP4_2L | 40653908 | 40654454 |
| AgamP4_2L | 40713402 | 40714029 |
| AgamP4_2L | 40968356 | 40968855 |
| AgamP4_2L | 41279774 | 41280274 |
| AgamP4_2L | 41648347 | 41648991 |
| AgamP4_2L | 41813422 | 41813985 |
| AgamP4_2L | 41910651 | 41911150 |
| AgamP4_2L | 42202593 | 42203123 |
| AgamP4_2L | 42535372 | 42535917 |
| AgamP4_2L | 42716960 | 42717465 |
| AgamP4_2L | 42904577 | 42905081 |
| AgamP4_2L | 43108827 | 43109342 |
| AgamP4_2L | 43127794 | 43128313 |
| AgamP4_2L | 43227409 | 43227937 |
| AgamP4_2L | 43408050 | 43408576 |
| AgamP4_2L | 43469990 | 43470510 |
| AgamP4_2L | 43674614 | 43675114 |
| AgamP4_2L | 43913180 | 43913684 |
| AgamP4_2L | 44198637 | 44199154 |
| AgamP4_2L | 44366079 | 44366578 |
| AgamP4_2L | 45052445 | 45052944 |
| AgamP4_2L | 45497775 | 45498285 |
| AgamP4_2L | 45545337 | 45545836 |
| AgamP4_2L | 45554643 | 45555143 |

|           |          |          |
|-----------|----------|----------|
| AgamP4_2L | 46179207 | 46179782 |
| AgamP4_2L | 46255475 | 46256157 |
| AgamP4_2L | 46577816 | 46578322 |
| AgamP4_2L | 47251086 | 47251585 |
| AgamP4_2L | 47543681 | 47544297 |
| AgamP4_2L | 47886590 | 47887117 |
| AgamP4_2L | 48006275 | 48006791 |
| AgamP4_2L | 48115020 | 48115578 |
| AgamP4_2L | 48145425 | 48145924 |
| AgamP4_2L | 48301693 | 48302230 |
| AgamP4_2L | 48405079 | 48405596 |
| AgamP4_2L | 48669278 | 48669777 |
| AgamP4_2L | 48756156 | 48756697 |
| AgamP4_2L | 48805087 | 48805593 |
| AgamP4_2L | 48883999 | 48884500 |
| AgamP4_2L | 48950373 | 48950949 |
| AgamP4_2L | 49037800 | 49038349 |
| AgamP4_3R | 261088   | 261602   |
| AgamP4_3R | 290262   | 290790   |
| AgamP4_3R | 318877   | 319376   |
| AgamP4_3R | 349925   | 350435   |
| AgamP4_3R | 475468   | 475989   |
| AgamP4_3R | 1114686  | 1115195  |
| AgamP4_3R | 1523727  | 1524249  |
| AgamP4_3R | 1548951  | 1549469  |
| AgamP4_3R | 1948172  | 1948768  |
| AgamP4_3R | 2157028  | 2157527  |
| AgamP4_3R | 2167035  | 2167540  |
| AgamP4_3R | 2687953  | 2688457  |
| AgamP4_3R | 2818511  | 2819011  |
| AgamP4_3R | 3606501  | 3607002  |
| AgamP4_3R | 3670649  | 3671184  |
| AgamP4_3R | 3980807  | 3981306  |
| AgamP4_3R | 4017716  | 4018224  |
| AgamP4_3R | 4019390  | 4019977  |
| AgamP4_3R | 4119492  | 4120039  |
| AgamP4_3R | 4246713  | 4247350  |
| AgamP4_3R | 4653749  | 4654274  |
| AgamP4_3R | 4747372  | 4747889  |
| AgamP4_3R | 5036603  | 5037183  |
| AgamP4_3R | 5451644  | 5452194  |
| AgamP4_3R | 5917878  | 5918383  |
| AgamP4_3R | 6419587  | 6420109  |
| AgamP4_3R | 7098521  | 7099020  |
| AgamP4_3R | 7464171  | 7464670  |
| AgamP4_3R | 8224821  | 8225336  |
| AgamP4_3R | 8554535  | 8555092  |
| AgamP4_3R | 8666012  | 8666530  |
| AgamP4_3R | 8700418  | 8701064  |
| AgamP4_3R | 9419629  | 9420128  |

|           |          |          |
|-----------|----------|----------|
| AgamP4_3R | 9841759  | 9842271  |
| AgamP4_3R | 10172477 | 10172976 |
| AgamP4_3R | 10569348 | 10569865 |
| AgamP4_3R | 10945237 | 10945736 |
| AgamP4_3R | 11000266 | 11000765 |
| AgamP4_3R | 11301972 | 11302553 |
| AgamP4_3R | 11774170 | 11774675 |
| AgamP4_3R | 11988792 | 11989348 |
| AgamP4_3R | 11999764 | 12000266 |
| AgamP4_3R | 12252633 | 12253132 |
| AgamP4_3R | 12365235 | 12365745 |
| AgamP4_3R | 12428199 | 12428710 |
| AgamP4_3R | 13885932 | 13886647 |
| AgamP4_3R | 13888507 | 13889017 |
| AgamP4_3R | 14800972 | 14801517 |
| AgamP4_3R | 14847697 | 14848229 |
| AgamP4_3R | 15007433 | 15007957 |
| AgamP4_3R | 15023743 | 15024244 |
| AgamP4_3R | 15208458 | 15208957 |
| AgamP4_3R | 15434961 | 15435470 |
| AgamP4_3R | 15459963 | 15460482 |
| AgamP4_3R | 15806703 | 15807218 |
| AgamP4_3R | 16873647 | 16874239 |
| AgamP4_3R | 16874387 | 16874933 |
| AgamP4_3R | 17256340 | 17256882 |
| AgamP4_3R | 17357505 | 17358005 |
| AgamP4_3R | 17600340 | 17600847 |
| AgamP4_3R | 18343330 | 18343859 |
| AgamP4_3R | 18377516 | 18378048 |
| AgamP4_3R | 18474638 | 18475145 |
| AgamP4_3R | 19157984 | 19158483 |
| AgamP4_3R | 19920433 | 19920932 |
| AgamP4_3R | 21220165 | 21220664 |
| AgamP4_3R | 21469719 | 21470220 |
| AgamP4_3R | 21504773 | 21505380 |
| AgamP4_3R | 21664124 | 21664623 |
| AgamP4_3R | 22125103 | 22125602 |
| AgamP4_3R | 23032298 | 23032800 |
| AgamP4_3R | 23058363 | 23058944 |
| AgamP4_3R | 23233191 | 23233690 |
| AgamP4_3R | 23264494 | 23265025 |
| AgamP4_3R | 23784702 | 23785201 |
| AgamP4_3R | 24041627 | 24042129 |
| AgamP4_3R | 24091222 | 24091751 |
| AgamP4_3R | 24104229 | 24104785 |
| AgamP4_3R | 24295724 | 24296368 |
| AgamP4_3R | 24355735 | 24356313 |
| AgamP4_3R | 24897428 | 24897950 |
| AgamP4_3R | 24980506 | 24981005 |
| AgamP4_3R | 25153915 | 25154414 |

|           |          |          |
|-----------|----------|----------|
| AgamP4_3R | 25255815 | 25256365 |
| AgamP4_3R | 26622331 | 26622832 |
| AgamP4_3R | 27118072 | 27118574 |
| AgamP4_3R | 27250456 | 27250967 |
| AgamP4_3R | 27301451 | 27302001 |
| AgamP4_3R | 27656727 | 27657311 |
| AgamP4_3R | 28134648 | 28135152 |
| AgamP4_3R | 28334010 | 28334585 |
| AgamP4_3R | 28511957 | 28512487 |
| AgamP4_3R | 28729723 | 28730230 |
| AgamP4_3R | 28929990 | 28930494 |
| AgamP4_3R | 29343220 | 29343719 |
| AgamP4_3R | 30351180 | 30351681 |
| AgamP4_3R | 30406276 | 30406935 |
| AgamP4_3R | 30768817 | 30769317 |
| AgamP4_3R | 30853572 | 30854131 |
| AgamP4_3R | 30958088 | 30958607 |
| AgamP4_3R | 31123480 | 31123981 |
| AgamP4_3R | 31519576 | 31520100 |
| AgamP4_3R | 31525805 | 31526321 |
| AgamP4_3R | 31678780 | 31679289 |
| AgamP4_3R | 32054344 | 32054843 |
| AgamP4_3R | 32237981 | 32238481 |
| AgamP4_3R | 33957265 | 33957774 |
| AgamP4_3R | 33976559 | 33977064 |
| AgamP4_3R | 34804341 | 34804861 |
| AgamP4_3R | 35009088 | 35009612 |
| AgamP4_3R | 35106950 | 35107471 |
| AgamP4_3R | 35109281 | 35109788 |
| AgamP4_3R | 35489827 | 35490352 |
| AgamP4_3R | 35612062 | 35612561 |
| AgamP4_3R | 35620004 | 35620504 |
| AgamP4_3R | 36020226 | 36020736 |
| AgamP4_3R | 36167436 | 36167972 |
| AgamP4_3R | 36237196 | 36237715 |
| AgamP4_3R | 37951568 | 37952071 |
| AgamP4_3R | 38328641 | 38329141 |
| AgamP4_3R | 38342506 | 38343022 |
| AgamP4_3R | 38543171 | 38543670 |
| AgamP4_3R | 39127893 | 39128454 |
| AgamP4_3R | 41010997 | 41011707 |
| AgamP4_3R | 42083984 | 42084517 |
| AgamP4_3R | 42397890 | 42398440 |
| AgamP4_3R | 42529493 | 42529997 |
| AgamP4_3R | 42605918 | 42606474 |
| AgamP4_3R | 42628536 | 42629068 |
| AgamP4_3R | 42631296 | 42631795 |
| AgamP4_3R | 42809549 | 42810048 |
| AgamP4_3R | 42956235 | 42956735 |
| AgamP4_3R | 43170017 | 43170523 |

|           |          |          |
|-----------|----------|----------|
| AgamP4_3R | 43229707 | 43230241 |
| AgamP4_3R | 43255136 | 43255659 |
| AgamP4_3R | 43273851 | 43274366 |
| AgamP4_3R | 43279431 | 43279930 |
| AgamP4_3R | 43540737 | 43541244 |
| AgamP4_3R | 43732862 | 43733361 |
| AgamP4_3R | 43841569 | 43842090 |
| AgamP4_3R | 44028300 | 44028840 |
| AgamP4_3R | 44507249 | 44507760 |
| AgamP4_3R | 44769235 | 44769740 |
| AgamP4_3R | 45188774 | 45189282 |
| AgamP4_3R | 47157092 | 47157593 |
| AgamP4_3R | 47263925 | 47264424 |
| AgamP4_3R | 47268523 | 47269055 |
| AgamP4_3R | 47741022 | 47741556 |
| AgamP4_3R | 47747698 | 47748197 |
| AgamP4_3R | 47782793 | 47783310 |
| AgamP4_3R | 48373569 | 48374084 |
| AgamP4_3R | 48404794 | 48405324 |
| AgamP4_3R | 48933689 | 48934191 |
| AgamP4_3R | 50236793 | 50237331 |
| AgamP4_3R | 50506666 | 50507173 |
| AgamP4_3R | 50656596 | 50657120 |
| AgamP4_3R | 51193548 | 51194054 |
| AgamP4_3R | 51272182 | 51272749 |
| AgamP4_3R | 51623011 | 51623586 |
| AgamP4_3R | 51776546 | 51777056 |
| AgamP4_3L | 2687043  | 2687547  |
| AgamP4_3L | 3260421  | 3260935  |
| AgamP4_3L | 3753300  | 3753832  |
| AgamP4_3L | 3761359  | 3761925  |
| AgamP4_3L | 5506021  | 5506531  |
| AgamP4_3L | 6420397  | 6420901  |
| AgamP4_3L | 6694645  | 6695170  |
| AgamP4_3L | 7086947  | 7087446  |
| AgamP4_3L | 8177859  | 8178370  |
| AgamP4_3L | 9635947  | 9636598  |
| AgamP4_3L | 10886759 | 10887261 |
| AgamP4_3L | 11849452 | 11849968 |
| AgamP4_3L | 12160018 | 12160557 |
| AgamP4_3L | 12235115 | 12235623 |
| AgamP4_3L | 12279951 | 12280475 |
| AgamP4_3L | 12603663 | 12604162 |
| AgamP4_3L | 12692202 | 12692705 |
| AgamP4_3L | 14146561 | 14147095 |
| AgamP4_3L | 14218226 | 14218972 |
| AgamP4_3L | 14749421 | 14749924 |
| AgamP4_3L | 14922276 | 14922885 |
| AgamP4_3L | 15726191 | 15726693 |
| AgamP4_3L | 15859555 | 15860255 |

|           |          |          |
|-----------|----------|----------|
| AgamP4_3L | 16170433 | 16170935 |
| AgamP4_3L | 16331103 | 16331690 |
| AgamP4_3L | 16849205 | 16849753 |
| AgamP4_3L | 16929572 | 16930071 |
| AgamP4_3L | 17575594 | 17576126 |
| AgamP4_3L | 18446241 | 18446753 |
| AgamP4_3L | 18886314 | 18886815 |
| AgamP4_3L | 19189581 | 19190114 |
| AgamP4_3L | 19561921 | 19562482 |
| AgamP4_3L | 19764369 | 19764871 |
| AgamP4_3L | 20236918 | 20237451 |
| AgamP4_3L | 20237801 | 20238316 |
| AgamP4_3L | 20408584 | 20409148 |
| AgamP4_3L | 20418654 | 20419169 |
| AgamP4_3L | 20647368 | 20647877 |
| AgamP4_3L | 21072427 | 21072943 |
| AgamP4_3L | 21716114 | 21716617 |
| AgamP4_3L | 22371309 | 22371947 |
| AgamP4_3L | 22720735 | 22721280 |
| AgamP4_3L | 23512716 | 23513220 |
| AgamP4_3L | 23851173 | 23851688 |
| AgamP4_3L | 24578518 | 24579017 |
| AgamP4_3L | 25727659 | 25728168 |
| AgamP4_3L | 25977055 | 25977566 |
| AgamP4_3L | 26196445 | 26197027 |
| AgamP4_3L | 26435947 | 26436548 |
| AgamP4_3L | 26449905 | 26450468 |
| AgamP4_3L | 27145396 | 27145921 |
| AgamP4_3L | 27362729 | 27363250 |
| AgamP4_3L | 27578500 | 27579058 |
| AgamP4_3L | 28017099 | 28017674 |
| AgamP4_3L | 28139146 | 28139684 |
| AgamP4_3L | 28302805 | 28303345 |
| AgamP4_3L | 28452688 | 28453244 |
| AgamP4_3L | 28821877 | 28822412 |
| AgamP4_3L | 28990372 | 28990951 |
| AgamP4_3L | 29156577 | 29157076 |
| AgamP4_3L | 29347063 | 29347604 |
| AgamP4_3L | 29373299 | 29373842 |
| AgamP4_3L | 29646039 | 29646543 |
| AgamP4_3L | 29768783 | 29769283 |
| AgamP4_3L | 30144639 | 30145146 |
| AgamP4_3L | 30823951 | 30824453 |
| AgamP4_3L | 30895804 | 30896410 |
| AgamP4_3L | 31031847 | 31032370 |
| AgamP4_3L | 31255775 | 31256313 |
| AgamP4_3L | 31577945 | 31578452 |
| AgamP4_3L | 31653881 | 31654468 |
| AgamP4_3L | 32160976 | 32161476 |
| AgamP4_3L | 32302346 | 32302845 |

|           |          |          |
|-----------|----------|----------|
| AgamP4_3L | 32374210 | 32374714 |
| AgamP4_3L | 32681633 | 32682161 |
| AgamP4_3L | 33210849 | 33211350 |
| AgamP4_3L | 33585179 | 33585707 |
| AgamP4_3L | 33959425 | 33959997 |
| AgamP4_3L | 34448681 | 34449180 |
| AgamP4_3L | 35499389 | 35499890 |
| AgamP4_3L | 35898452 | 35898956 |
| AgamP4_3L | 36116490 | 36117043 |
| AgamP4_3L | 36198958 | 36199458 |
| AgamP4_3L | 36899114 | 36899622 |
| AgamP4_3L | 37796558 | 37797058 |
| AgamP4_3L | 38233940 | 38234467 |
| AgamP4_3L | 38381731 | 38382230 |
| AgamP4_3L | 38859298 | 38859797 |
| AgamP4_3L | 39220006 | 39220505 |
| AgamP4_3L | 39380656 | 39381170 |
| AgamP4_3L | 39467697 | 39468198 |
| AgamP4_3L | 39605548 | 39606049 |
| AgamP4_3L | 39774353 | 39774904 |
| AgamP4_3L | 39873528 | 39874126 |
| AgamP4_3L | 40068996 | 40069496 |
| AgamP4_3L | 40096947 | 40097536 |
| AgamP4_3L | 40276566 | 40277089 |
| AgamP4_3L | 40525427 | 40526050 |
| AgamP4_3L | 40610308 | 40610898 |
| AgamP4_3L | 40904050 | 40904549 |
| AgamP4_3L | 40932700 | 40933301 |
| AgamP4_X  | 472835   | 473355   |
| AgamP4_X  | 1219268  | 1219874  |
| AgamP4_X  | 1561050  | 1561578  |
| AgamP4_X  | 1697457  | 1698027  |
| AgamP4_X  | 2507714  | 2508213  |
| AgamP4_X  | 2840127  | 2840667  |
| AgamP4_X  | 2841631  | 2842188  |
| AgamP4_X  | 2842167  | 2842698  |
| AgamP4_X  | 2867998  | 2868539  |
| AgamP4_X  | 3158626  | 3159125  |
| AgamP4_X  | 3230798  | 3231340  |
| AgamP4_X  | 4406673  | 4407173  |
| AgamP4_X  | 4646184  | 4646769  |
| AgamP4_X  | 4978005  | 4978548  |
| AgamP4_X  | 5604955  | 5605481  |
| AgamP4_X  | 5675703  | 5676202  |
| AgamP4_X  | 5770901  | 5771480  |
| AgamP4_X  | 6303592  | 6304102  |
| AgamP4_X  | 6395727  | 6396245  |
| AgamP4_X  | 7078231  | 7078794  |
| AgamP4_X  | 7092739  | 7093300  |
| AgamP4_X  | 7562045  | 7562586  |

|           |          |          |
|-----------|----------|----------|
| AgamP4_X  | 7686579  | 7687078  |
| AgamP4_X  | 7775652  | 7776152  |
| AgamP4_X  | 8210322  | 8210899  |
| AgamP4_X  | 8349789  | 8350297  |
| AgamP4_X  | 8443888  | 8444391  |
| AgamP4_X  | 8987163  | 8987693  |
| AgamP4_X  | 9137500  | 9137999  |
| AgamP4_X  | 10763272 | 10763808 |
| AgamP4_X  | 10782469 | 10783036 |
| AgamP4_X  | 12450020 | 12450543 |
| AgamP4_X  | 13072141 | 13072710 |
| AgamP4_X  | 13524456 | 13524987 |
| AgamP4_X  | 14238726 | 14239238 |
| AgamP4_X  | 14424174 | 14424709 |
| AgamP4_X  | 14563959 | 14564653 |
| AgamP4_X  | 14893708 | 14894358 |
| AgamP4_X  | 15046766 | 15047297 |
| AgamP4_X  | 15262934 | 15263441 |
| AgamP4_X  | 15610926 | 15611480 |
| AgamP4_X  | 15635416 | 15635984 |
| AgamP4_X  | 15676451 | 15676956 |
| AgamP4_X  | 15684948 | 15685447 |
| AgamP4_X  | 16196678 | 16197194 |
| AgamP4_X  | 16407873 | 16408372 |
| AgamP4_X  | 16503513 | 16504013 |
| AgamP4_X  | 16866927 | 16867426 |
| AgamP4_X  | 17178590 | 17179093 |
| AgamP4_X  | 17421434 | 17421946 |
| AgamP4_X  | 17554843 | 17555367 |
| AgamP4_X  | 17584901 | 17585414 |
| AgamP4_X  | 18261699 | 18262200 |
| AgamP4_X  | 18314663 | 18315172 |
| AgamP4_X  | 18556820 | 18557329 |
| AgamP4_X  | 18899173 | 18899672 |
| AgamP4_X  | 19120213 | 19120741 |
| AgamP4_X  | 19151887 | 19152386 |
| AgamP4_X  | 19360100 | 19360601 |
| AgamP4_X  | 19527623 | 19528233 |
| AgamP4_X  | 19577574 | 19578076 |
| AgamP4_X  | 20805839 | 20806348 |
| AgamP4_X  | 23508770 | 23509279 |
| AgamP4_2R | 1626832  | 1627378  |
| AgamP4_2R | 2041563  | 2042077  |
| AgamP4_2R | 2205758  | 2206297  |
| AgamP4_2R | 3639149  | 3639653  |
| AgamP4_2R | 3739414  | 3739921  |
| AgamP4_2R | 3760428  | 3761109  |
| AgamP4_2R | 4524282  | 4525002  |
| AgamP4_2R | 4748095  | 4748695  |
| AgamP4_2R | 4840471  | 4840992  |

|           |          |          |
|-----------|----------|----------|
| AgamP4_2R | 5269146  | 5269755  |
| AgamP4_2R | 5374837  | 5375338  |
| AgamP4_2R | 6027710  | 6028218  |
| AgamP4_2R | 6359438  | 6360058  |
| AgamP4_2R | 6371361  | 6371988  |
| AgamP4_2R | 6376775  | 6377284  |
| AgamP4_2R | 6547359  | 6548057  |
| AgamP4_2R | 6792808  | 6793336  |
| AgamP4_2R | 6829289  | 6829883  |
| AgamP4_2R | 8054084  | 8054781  |
| AgamP4_2R | 9583331  | 9583847  |
| AgamP4_2R | 10405222 | 10405724 |
| AgamP4_2R | 10432382 | 10432979 |
| AgamP4_2R | 10474178 | 10474718 |
| AgamP4_2R | 11486888 | 11487570 |
| AgamP4_2R | 11590309 | 11591026 |
| AgamP4_2R | 11648466 | 11649060 |
| AgamP4_2R | 13196420 | 13197006 |
| AgamP4_2R | 13211122 | 13211739 |
| AgamP4_2R | 13270200 | 13270718 |
| AgamP4_2R | 13827813 | 13828357 |
| AgamP4_2R | 14054419 | 14055148 |
| AgamP4_2R | 14431981 | 14432481 |
| AgamP4_2R | 15296788 | 15297289 |
| AgamP4_2R | 15637968 | 15638491 |
| AgamP4_2R | 15741541 | 15742045 |
| AgamP4_2R | 15956999 | 15957530 |
| AgamP4_2R | 16001098 | 16001750 |
| AgamP4_2R | 16563028 | 16563538 |
| AgamP4_2R | 16772245 | 16772747 |
| AgamP4_2R | 17078051 | 17078561 |
| AgamP4_2R | 18059494 | 18060162 |
| AgamP4_2R | 18222804 | 18223313 |
| AgamP4_2R | 18356669 | 18357191 |
| AgamP4_2R | 18395334 | 18395938 |
| AgamP4_2R | 18977771 | 18978272 |
| AgamP4_2R | 19992009 | 19992550 |
| AgamP4_2R | 20594447 | 20594966 |
| AgamP4_2R | 22545250 | 22545798 |
| AgamP4_2R | 23032457 | 23032995 |
| AgamP4_2R | 23206675 | 23207176 |
| AgamP4_2R | 23659508 | 23660018 |
| AgamP4_2R | 24184390 | 24184935 |
| AgamP4_2R | 25549296 | 25549966 |
| AgamP4_2R | 25633279 | 25633839 |
| AgamP4_2R | 25852557 | 25853073 |
| AgamP4_2R | 26165634 | 26166140 |
| AgamP4_2R | 26378309 | 26378842 |
| AgamP4_2R | 26504906 | 26505548 |
| AgamP4_2R | 26653820 | 26654330 |

|           |          |          |
|-----------|----------|----------|
| AgamP4_2R | 27187813 | 27188420 |
| AgamP4_2R | 27219201 | 27219753 |
| AgamP4_2R | 28092983 | 28093573 |
| AgamP4_2R | 28098689 | 28099217 |
| AgamP4_2R | 28838960 | 28839507 |
| AgamP4_2R | 29375459 | 29375984 |
| AgamP4_2R | 29920290 | 29920825 |
| AgamP4_2R | 30221535 | 30222048 |
| AgamP4_2R | 30731419 | 30731967 |
| AgamP4_2R | 31950155 | 31950658 |
| AgamP4_2R | 32085741 | 32086250 |
| AgamP4_2R | 32393683 | 32394238 |
| AgamP4_2R | 32654754 | 32655274 |
| AgamP4_2R | 32838983 | 32839488 |
| AgamP4_2R | 33580460 | 33581107 |
| AgamP4_2R | 35219957 | 35220488 |
| AgamP4_2R | 36460218 | 36460866 |
| AgamP4_2R | 36464913 | 36465436 |
| AgamP4_2R | 39120008 | 39120621 |
| AgamP4_2R | 41117038 | 41117548 |
| AgamP4_2R | 42123172 | 42123750 |
| AgamP4_2R | 42192188 | 42192694 |
| AgamP4_2R | 42434687 | 42435248 |
| AgamP4_2R | 43041905 | 43042421 |
| AgamP4_2R | 43610582 | 43611099 |
| AgamP4_2R | 43884489 | 43885014 |
| AgamP4_2R | 44314222 | 44314724 |
| AgamP4_2R | 45762303 | 45762855 |
| AgamP4_2R | 47020105 | 47020714 |
| AgamP4_2R | 48625662 | 48626167 |
| AgamP4_2R | 49887239 | 49887753 |
| AgamP4_2R | 50073284 | 50073891 |
| AgamP4_2R | 50746929 | 50747457 |
| AgamP4_2R | 53116811 | 53117344 |
| AgamP4_2R | 53255523 | 53256041 |
| AgamP4_2R | 53331462 | 53332043 |
| AgamP4_2R | 53498568 | 53499083 |
| AgamP4_2R | 54348757 | 54349294 |
| AgamP4_2R | 54801732 | 54802475 |
| AgamP4_2R | 55030526 | 55031028 |
| AgamP4_2R | 56128591 | 56129193 |
| AgamP4_2R | 56400711 | 56401256 |
| AgamP4_2R | 58167517 | 58168087 |
| AgamP4_2R | 58258179 | 58258873 |
| AgamP4_2L | 1734485  | 1735015  |
| AgamP4_2L | 1744847  | 1745488  |
| AgamP4_2L | 3966881  | 3967563  |
| AgamP4_2L | 4111359  | 4111939  |
| AgamP4_2L | 4517619  | 4518142  |
| AgamP4_2L | 7415108  | 7415609  |

|           |          |         |          |
|-----------|----------|---------|----------|
| AgamP4_2L | 8061440  | 8061973 |          |
| AgamP4_2L | 8709648  | 8710153 |          |
| AgamP4_2L | 8905950  | 8906498 |          |
| AgamP4_2L | 9176011  | 9176557 |          |
| AgamP4_2L | 9606253  | 9606796 |          |
| AgamP4_2L | 10845073 |         | 10845580 |
| AgamP4_2L | 12127846 |         | 12128355 |
| AgamP4_2L | 12627679 |         | 12628178 |
| AgamP4_2L | 12786812 |         | 12787402 |
| AgamP4_2L | 14956376 |         | 14957084 |
| AgamP4_2L | 15170949 |         | 15171467 |
| AgamP4_2L | 15183341 |         | 15183958 |
| AgamP4_2L | 16207757 |         | 16208337 |
| AgamP4_2L | 16415173 |         | 16415709 |
| AgamP4_2L | 16434689 |         | 16435190 |
| AgamP4_2L | 17498026 |         | 17498525 |
| AgamP4_2L | 20130516 |         | 20131029 |
| AgamP4_2L | 21041017 |         | 21041527 |
| AgamP4_2L | 22056420 |         | 22056925 |
| AgamP4_2L | 23096988 |         | 23097539 |
| AgamP4_2L | 23728109 |         | 23728648 |
| AgamP4_2L | 23979142 |         | 23979711 |
| AgamP4_2L | 24358225 |         | 24358755 |
| AgamP4_2L | 25041347 |         | 25041859 |
| AgamP4_2L | 25701851 |         | 25702475 |
| AgamP4_2L | 26696803 |         | 26697491 |
| AgamP4_2L | 26805622 |         | 26806136 |
| AgamP4_2L | 27510170 |         | 27510872 |
| AgamP4_2L | 28658673 |         | 28659262 |
| AgamP4_2L | 29883910 |         | 29884416 |
| AgamP4_2L | 31092110 |         | 31092627 |
| AgamP4_2L | 31374705 |         | 31375232 |
| AgamP4_2L | 31645652 |         | 31646174 |
| AgamP4_2L | 31841014 |         | 31841555 |
| AgamP4_2L | 32398938 |         | 32399501 |
| AgamP4_2L | 32751218 |         | 32751734 |
| AgamP4_2L | 33401646 |         | 33402173 |
| AgamP4_2L | 34053897 |         | 34054407 |
| AgamP4_2L | 35910177 |         | 35910794 |
| AgamP4_2L | 36181869 |         | 36182373 |
| AgamP4_2L | 36893933 |         | 36894670 |
| AgamP4_2L | 37491546 |         | 37492079 |
| AgamP4_2L | 37699062 |         | 37699571 |
| AgamP4_2L | 38057592 |         | 38058177 |
| AgamP4_2L | 38155644 |         | 38156156 |
| AgamP4_2L | 38494062 |         | 38494664 |
| AgamP4_2L | 39379793 |         | 39380368 |
| AgamP4_2L | 40844881 |         | 40845390 |
| AgamP4_2L | 40995886 |         | 40996418 |
| AgamP4_2L | 41229133 |         | 41229771 |

|           |          |          |
|-----------|----------|----------|
| AgamP4_2L | 41333602 | 41334227 |
| AgamP4_2L | 42426546 | 42427192 |
| AgamP4_2L | 42694433 | 42694983 |
| AgamP4_2L | 42784564 | 42785078 |
| AgamP4_2L | 43070343 | 43070843 |
| AgamP4_2L | 43736417 | 43737067 |
| AgamP4_2L | 43852863 | 43853367 |
| AgamP4_2L | 44017614 | 44018175 |
| AgamP4_2L | 44052820 | 44053366 |
| AgamP4_2L | 44878500 | 44879026 |
| AgamP4_2L | 45627496 | 45628150 |
| AgamP4_2L | 46149722 | 46150279 |
| AgamP4_2L | 46709559 | 46710283 |
| AgamP4_2L | 47001307 | 47001844 |
| AgamP4_2L | 47158631 | 47159186 |
| AgamP4_2L | 48875979 | 48876539 |
| AgamP4_3R | 491054   | 491759   |
| AgamP4_3R | 2049945  | 2050499  |
| AgamP4_3R | 2505295  | 2505829  |
| AgamP4_3R | 2675949  | 2676559  |
| AgamP4_3R | 3556758  | 3557278  |
| AgamP4_3R | 4606003  | 4606527  |
| AgamP4_3R | 5100010  | 5100548  |
| AgamP4_3R | 5490929  | 5491510  |
| AgamP4_3R | 5911258  | 5911838  |
| AgamP4_3R | 6595610  | 6596328  |
| AgamP4_3R | 6661464  | 6661998  |
| AgamP4_3R | 7562496  | 7563007  |
| AgamP4_3R | 7725666  | 7726325  |
| AgamP4_3R | 8415281  | 8415827  |
| AgamP4_3R | 8814861  | 8815419  |
| AgamP4_3R | 8978176  | 8978793  |
| AgamP4_3R | 9462311  | 9462819  |
| AgamP4_3R | 9477537  | 9478045  |
| AgamP4_3R | 10229326 | 10229825 |
| AgamP4_3R | 10318056 | 10318556 |
| AgamP4_3R | 11747915 | 11748446 |
| AgamP4_3R | 12500768 | 12501402 |
| AgamP4_3R | 13758565 | 13759113 |
| AgamP4_3R | 14138392 | 14138917 |
| AgamP4_3R | 14326013 | 14326678 |
| AgamP4_3R | 15540024 | 15540529 |
| AgamP4_3R | 16359725 | 16360276 |
| AgamP4_3R | 17596422 | 17596922 |
| AgamP4_3R | 18069245 | 18069753 |
| AgamP4_3R | 19830549 | 19831082 |
| AgamP4_3R | 20252918 | 20253506 |
| AgamP4_3R | 20835551 | 20836065 |
| AgamP4_3R | 21037767 | 21038274 |
| AgamP4_3R | 21223065 | 21223568 |

|           |          |          |
|-----------|----------|----------|
| AgamP4_3R | 21629952 | 21630527 |
| AgamP4_3R | 21777825 | 21778340 |
| AgamP4_3R | 21884401 | 21884917 |
| AgamP4_3R | 22733701 | 22734282 |
| AgamP4_3R | 24427622 | 24428318 |
| AgamP4_3R | 24864822 | 24865345 |
| AgamP4_3R | 24914705 | 24915373 |
| AgamP4_3R | 25409731 | 25410242 |
| AgamP4_3R | 25808317 | 25808844 |
| AgamP4_3R | 26051325 | 26051859 |
| AgamP4_3R | 26437430 | 26437944 |
| AgamP4_3R | 26778176 | 26778687 |
| AgamP4_3R | 28051641 | 28052234 |
| AgamP4_3R | 28626347 | 28626848 |
| AgamP4_3R | 29539741 | 29540259 |
| AgamP4_3R | 29674310 | 29674821 |
| AgamP4_3R | 31567613 | 31568223 |
| AgamP4_3R | 31731082 | 31731604 |
| AgamP4_3R | 32799273 | 32799852 |
| AgamP4_3R | 34311045 | 34311599 |
| AgamP4_3R | 34806266 | 34806787 |
| AgamP4_3R | 35413279 | 35413784 |
| AgamP4_3R | 36288511 | 36289056 |
| AgamP4_3R | 36354944 | 36355489 |
| AgamP4_3R | 37273673 | 37274314 |
| AgamP4_3R | 37789228 | 37789739 |
| AgamP4_3R | 38043284 | 38043811 |
| AgamP4_3R | 38452147 | 38452729 |
| AgamP4_3R | 38849078 | 38849817 |
| AgamP4_3R | 40173780 | 40174287 |
| AgamP4_3R | 41476293 | 41476823 |
| AgamP4_3R | 42540368 | 42540871 |
| AgamP4_3R | 43785461 | 43785969 |
| AgamP4_3R | 43834860 | 43835432 |
| AgamP4_3R | 44022134 | 44022751 |
| AgamP4_3R | 44509289 | 44509854 |
| AgamP4_3R | 45219135 | 45219670 |
| AgamP4_3R | 48082692 | 48083334 |
| AgamP4_3R | 48426342 | 48426854 |
| AgamP4_3R | 48863323 | 48863837 |
| AgamP4_3R | 52605846 | 52606377 |
| AgamP4_3L | 342544   | 343088   |
| AgamP4_3L | 2780417  | 2780960  |
| AgamP4_3L | 8729863  | 8730366  |
| AgamP4_3L | 10590119 | 10590618 |
| AgamP4_3L | 10718342 | 10718976 |
| AgamP4_3L | 11366877 | 11367383 |
| AgamP4_3L | 11449851 | 11450350 |
| AgamP4_3L | 11644900 | 11645417 |
| AgamP4_3L | 11834538 | 11835059 |

|           |          |          |
|-----------|----------|----------|
| AgamP4_3L | 13784699 | 13785204 |
| AgamP4_3L | 14344867 | 14345370 |
| AgamP4_3L | 15669355 | 15669941 |
| AgamP4_3L | 16362987 | 16363540 |
| AgamP4_3L | 16940762 | 16941400 |
| AgamP4_3L | 18411579 | 18412081 |
| AgamP4_3L | 18761238 | 18761780 |
| AgamP4_3L | 19161369 | 19161885 |
| AgamP4_3L | 19203775 | 19204295 |
| AgamP4_3L | 19285917 | 19286416 |
| AgamP4_3L | 20807442 | 20807960 |
| AgamP4_3L | 20874660 | 20875293 |
| AgamP4_3L | 22542739 | 22543415 |
| AgamP4_3L | 23564203 | 23564843 |
| AgamP4_3L | 24111969 | 24112612 |
| AgamP4_3L | 25259885 | 25260442 |
| AgamP4_3L | 26017912 | 26018471 |
| AgamP4_3L | 27505720 | 27506291 |
| AgamP4_3L | 28649143 | 28649643 |
| AgamP4_3L | 29005961 | 29006630 |
| AgamP4_3L | 29040483 | 29041015 |
| AgamP4_3L | 29579838 | 29580358 |
| AgamP4_3L | 29605634 | 29606170 |
| AgamP4_3L | 30737980 | 30738498 |
| AgamP4_3L | 31439629 | 31440142 |
| AgamP4_3L | 32287882 | 32288385 |
| AgamP4_3L | 32830752 | 32831267 |
| AgamP4_3L | 32923799 | 32924319 |
| AgamP4_3L | 33348839 | 33349567 |
| AgamP4_3L | 34743003 | 34743527 |
| AgamP4_3L | 34763308 | 34763825 |
| AgamP4_3L | 35158689 | 35159328 |
| AgamP4_3L | 35281828 | 35282368 |
| AgamP4_3L | 35660827 | 35661339 |
| AgamP4_3L | 36185569 | 36186069 |
| AgamP4_3L | 36417359 | 36417876 |
| AgamP4_3L | 37225380 | 37225908 |
| AgamP4_3L | 38102525 | 38103069 |
| AgamP4_3L | 38104038 | 38104585 |
| AgamP4_3L | 38181573 | 38182093 |
| AgamP4_3L | 38185468 | 38186089 |
| AgamP4_3L | 39232889 | 39233524 |
| AgamP4_3L | 39234021 | 39234537 |
| AgamP4_3L | 40759521 | 40760199 |
| AgamP4_3L | 40902403 | 40902992 |
| AgamP4_3L | 41466443 | 41466949 |
| AgamP4_3L | 41487624 | 41488133 |
| AgamP4_X  | 103514   | 104066   |
| AgamP4_X  | 423144   | 423680   |
| AgamP4_X  | 485643   | 486199   |

|           |          |          |
|-----------|----------|----------|
| AgamP4_X  | 718067   | 718632   |
| AgamP4_X  | 1341264  | 1341917  |
| AgamP4_X  | 1959989  | 1960520  |
| AgamP4_X  | 2355037  | 2355725  |
| AgamP4_X  | 3470664  | 3471340  |
| AgamP4_X  | 3633273  | 3633792  |
| AgamP4_X  | 4161041  | 4161547  |
| AgamP4_X  | 4324440  | 4324968  |
| AgamP4_X  | 4741885  | 4742583  |
| AgamP4_X  | 5702596  | 5703126  |
| AgamP4_X  | 6209874  | 6210491  |
| AgamP4_X  | 6276982  | 6277587  |
| AgamP4_X  | 7914561  | 7915098  |
| AgamP4_X  | 7957394  | 7958078  |
| AgamP4_X  | 8604209  | 8604777  |
| AgamP4_X  | 8836648  | 8837254  |
| AgamP4_X  | 9554981  | 9555543  |
| AgamP4_X  | 10017234 | 10017774 |
| AgamP4_X  | 10350432 | 10351035 |
| AgamP4_X  | 10695308 | 10695946 |
| AgamP4_X  | 11067071 | 11067621 |
| AgamP4_X  | 11566354 | 11566853 |
| AgamP4_X  | 12296099 | 12296599 |
| AgamP4_X  | 13225398 | 13225905 |
| AgamP4_X  | 13979517 | 13980178 |
| AgamP4_X  | 15044112 | 15044617 |
| AgamP4_X  | 17050790 | 17051420 |
| AgamP4_X  | 17743843 | 17744428 |
| AgamP4_X  | 18392925 | 18393453 |
| AgamP4_X  | 18857419 | 18857979 |
| AgamP4_X  | 19603612 | 19604130 |
| AgamP4_X  | 24383377 | 24383891 |
| AgamP4_2R | 686956   | 687561   |
| AgamP4_2R | 1758524  | 1759043  |
| AgamP4_2R | 2158135  | 2158653  |
| AgamP4_2R | 3566956  | 3567481  |
| AgamP4_2R | 3625868  | 3626571  |
| AgamP4_2R | 4796159  | 4796856  |
| AgamP4_2R | 5065249  | 5065802  |
| AgamP4_2R | 5455639  | 5456249  |
| AgamP4_2R | 5494562  | 5495177  |
| AgamP4_2R | 7462089  | 7462669  |
| AgamP4_2R | 9205462  | 9205985  |
| AgamP4_2R | 9416258  | 9416810  |
| AgamP4_2R | 9917699  | 9918203  |
| AgamP4_2R | 10347587 | 10348205 |
| AgamP4_2R | 11710235 | 11710824 |
| AgamP4_2R | 11842727 | 11843296 |
| AgamP4_2R | 12507740 | 12508336 |
| AgamP4_2R | 13001362 | 13001864 |

|           |          |          |
|-----------|----------|----------|
| AgamP4_2R | 14913451 | 14914054 |
| AgamP4_2R | 15021042 | 15021633 |
| AgamP4_2R | 16560998 | 16561626 |
| AgamP4_2R | 16991615 | 16992163 |
| AgamP4_2R | 18989143 | 18989652 |
| AgamP4_2R | 19258816 | 19259371 |
| AgamP4_2R | 20021280 | 20021862 |
| AgamP4_2R | 20454692 | 20455193 |
| AgamP4_2R | 21995594 | 21996128 |
| AgamP4_2R | 23123472 | 23123971 |
| AgamP4_2R | 26093060 | 26093642 |
| AgamP4_2R | 26952890 | 26953549 |
| AgamP4_2R | 31412333 | 31412883 |
| AgamP4_2R | 36143461 | 36144013 |
| AgamP4_2R | 37306424 | 37306931 |
| AgamP4_2R | 37894361 | 37894883 |
| AgamP4_2R | 37912363 | 37912901 |
| AgamP4_2R | 37941494 | 37942022 |
| AgamP4_2R | 38844561 | 38845142 |
| AgamP4_2R | 39296182 | 39296833 |
| AgamP4_2R | 40319350 | 40319851 |
| AgamP4_2R | 42431422 | 42431930 |
| AgamP4_2R | 43880316 | 43880841 |
| AgamP4_2R | 44036717 | 44037233 |
| AgamP4_2R | 44392214 | 44392820 |
| AgamP4_2R | 44701255 | 44701754 |
| AgamP4_2R | 45660110 | 45660698 |
| AgamP4_2R | 47018051 | 47018686 |
| AgamP4_2R | 49244161 | 49244673 |
| AgamP4_2R | 49845881 | 49846407 |
| AgamP4_2R | 56846222 | 56846741 |
| AgamP4_2R | 60381444 | 60381974 |
| AgamP4_2L | 351396   | 351901   |
| AgamP4_2L | 3738278  | 3738809  |
| AgamP4_2L | 9994425  | 9994928  |
| AgamP4_2L | 11372658 | 11373185 |
| AgamP4_2L | 11482348 | 11482942 |
| AgamP4_2L | 11798207 | 11798742 |
| AgamP4_2L | 17781760 | 17782268 |
| AgamP4_2L | 18394919 | 18395476 |
| AgamP4_2L | 19451789 | 19452314 |
| AgamP4_2L | 20489615 | 20490290 |
| AgamP4_2L | 20604312 | 20605028 |
| AgamP4_2L | 21164035 | 21164535 |
| AgamP4_2L | 21740819 | 21741338 |
| AgamP4_2L | 22487119 | 22487654 |
| AgamP4_2L | 23536408 | 23536923 |
| AgamP4_2L | 23956800 | 23957368 |
| AgamP4_2L | 25621811 | 25622311 |
| AgamP4_2L | 25672532 | 25673051 |

|           |          |          |
|-----------|----------|----------|
| AgamP4_2L | 26336567 | 26337155 |
| AgamP4_2L | 27399541 | 27400075 |
| AgamP4_2L | 31658031 | 31658548 |
| AgamP4_2L | 34092987 | 34093492 |
| AgamP4_2L | 34526074 | 34526584 |
| AgamP4_2L | 35360845 | 35361364 |
| AgamP4_2L | 36245087 | 36245593 |
| AgamP4_2L | 37426826 | 37427357 |
| AgamP4_2L | 37770084 | 37770603 |
| AgamP4_2L | 39322462 | 39322984 |
| AgamP4_2L | 40521858 | 40522357 |
| AgamP4_2L | 40835132 | 40835758 |
| AgamP4_2L | 41231434 | 41232058 |
| AgamP4_2L | 44370967 | 44371502 |
| AgamP4_2L | 45602316 | 45602841 |
| AgamP4_3R | 744035   | 744538   |
| AgamP4_3R | 849913   | 850480   |
| AgamP4_3R | 2313263  | 2313808  |
| AgamP4_3R | 2555206  | 2555807  |
| AgamP4_3R | 3587505  | 3588097  |
| AgamP4_3R | 5396926  | 5397505  |
| AgamP4_3R | 5401372  | 5401936  |
| AgamP4_3R | 7289138  | 7289834  |
| AgamP4_3R | 7300825  | 7301377  |
| AgamP4_3R | 8867344  | 8867967  |
| AgamP4_3R | 10831232 | 10831825 |
| AgamP4_3R | 14137553 | 14138101 |
| AgamP4_3R | 16553258 | 16553773 |
| AgamP4_3R | 20183239 | 20183745 |
| AgamP4_3R | 20273380 | 20273931 |
| AgamP4_3R | 21014594 | 21015220 |
| AgamP4_3R | 22282261 | 22282801 |
| AgamP4_3R | 25764272 | 25764795 |
| AgamP4_3R | 25814120 | 25814846 |
| AgamP4_3R | 26216801 | 26217301 |
| AgamP4_3R | 28052535 | 28053202 |
| AgamP4_3R | 31205782 | 31206339 |
| AgamP4_3R | 35004726 | 35005271 |
| AgamP4_3R | 35599312 | 35599845 |
| AgamP4_3R | 37499018 | 37499612 |
| AgamP4_3R | 37959036 | 37959576 |
| AgamP4_3R | 41463669 | 41464224 |
| AgamP4_3R | 41713959 | 41714470 |
| AgamP4_3R | 43845064 | 43845632 |
| AgamP4_3L | 7652648  | 7653156  |
| AgamP4_3L | 7939611  | 7940132  |
| AgamP4_3L | 8752190  | 8752701  |
| AgamP4_3L | 9604169  | 9604681  |
| AgamP4_3L | 13761640 | 13762158 |
| AgamP4_3L | 17132455 | 17133033 |

|           |          |          |
|-----------|----------|----------|
| AgamP4_3L | 20747640 | 20748257 |
| AgamP4_3L | 22467423 | 22467948 |
| AgamP4_3L | 24854188 | 24854693 |
| AgamP4_3L | 27783265 | 27783764 |
| AgamP4_3L | 27923064 | 27923583 |
| AgamP4_3L | 27953960 | 27954670 |
| AgamP4_3L | 28384716 | 28385259 |
| AgamP4_3L | 30917779 | 30918366 |
| AgamP4_3L | 33215114 | 33215667 |
| AgamP4_3L | 34902843 | 34903342 |
| AgamP4_3L | 35028462 | 35029025 |
| AgamP4_3L | 38779276 | 38779847 |
| AgamP4_3L | 41603341 | 41603879 |
| AgamP4_X  | 131413   | 131926   |
| AgamP4_X  | 500955   | 501515   |
| AgamP4_X  | 917242   | 917755   |
| AgamP4_X  | 3683954  | 3684460  |
| AgamP4_X  | 4402766  | 4403282  |
| AgamP4_X  | 4665289  | 4665801  |
| AgamP4_X  | 5297132  | 5297846  |
| AgamP4_X  | 5614222  | 5614815  |
| AgamP4_X  | 5704391  | 5704958  |
| AgamP4_X  | 6420609  | 6421119  |
| AgamP4_X  | 6827937  | 6828436  |
| AgamP4_X  | 7716028  | 7716527  |
| AgamP4_X  | 7888574  | 7889178  |
| AgamP4_X  | 8355463  | 8356179  |
| AgamP4_X  | 9490683  | 9491222  |
| AgamP4_X  | 10701746 | 10702312 |
| AgamP4_X  | 11533059 | 11533558 |
| AgamP4_X  | 12708578 | 12709162 |
| AgamP4_X  | 12942238 | 12942802 |
| AgamP4_X  | 13011592 | 13012191 |
| AgamP4_X  | 13157436 | 13158081 |
| AgamP4_X  | 14064183 | 14064724 |
| AgamP4_X  | 15154405 | 15155004 |
| AgamP4_X  | 15693525 | 15694103 |
| AgamP4_X  | 19107253 | 19107838 |
| AgamP4_X  | 21226400 | 21227018 |
| AgamP4_2L | 340847   | 341369   |
| AgamP4_2L | 1157678  | 1158229  |
| AgamP4_2L | 2926616  | 2927171  |
| AgamP4_2L | 3028638  | 3029194  |
| AgamP4_2L | 3151257  | 3151859  |
| AgamP4_2L | 3157740  | 3158254  |
| AgamP4_2L | 3163705  | 3164269  |
| AgamP4_2L | 3205648  | 3206291  |
| AgamP4_2L | 3394761  | 3395300  |
| AgamP4_2L | 3432025  | 3432702  |
| AgamP4_2L | 3443851  | 3444368  |

|           |         |         |
|-----------|---------|---------|
| AgamP4_2L | 3486488 | 3487011 |
| AgamP4_2L | 3734921 | 3735707 |
| AgamP4_2L | 3756867 | 3757519 |
| AgamP4_2L | 3844712 | 3845354 |
| AgamP4_2L | 3877623 | 3878133 |
| AgamP4_2L | 3881189 | 3881711 |
| AgamP4_2L | 3883265 | 3883779 |
| AgamP4_2L | 3905386 | 3905888 |
| AgamP4_2L | 3906904 | 3907442 |
| AgamP4_2L | 3924231 | 3924768 |
| AgamP4_2L | 3924748 | 3925270 |
| AgamP4_2L | 3949996 | 3950593 |
| AgamP4_2L | 3967336 | 3968068 |
| AgamP4_2L | 3967838 | 3968581 |
| AgamP4_2L | 3981837 | 3982356 |
| AgamP4_2L | 4310619 | 4311346 |
| AgamP4_2L | 4829839 | 4830455 |
| AgamP4_2L | 5025346 | 5025890 |
| AgamP4_2L | 5345379 | 5345960 |
| AgamP4_2L | 6207247 | 6207820 |
| AgamP4_2L | 6208047 | 6208566 |
| AgamP4_2L | 6208577 | 6209076 |
| AgamP4_2L | 6432195 | 6432716 |
| AgamP4_2L | 6434752 | 6435366 |
| AgamP4_2L | 6470265 | 6470821 |
| AgamP4_2L | 6519284 | 6519840 |
| AgamP4_2L | 6538912 | 6539473 |
| AgamP4_2L | 6558549 | 6559051 |
| AgamP4_2L | 6633392 | 6633924 |
| AgamP4_2L | 6643318 | 6643881 |
| AgamP4_2L | 6687981 | 6688562 |
| AgamP4_2L | 6741957 | 6742473 |
| AgamP4_2L | 6756039 | 6756619 |
| AgamP4_2L | 6844254 | 6844807 |
| AgamP4_2L | 6913209 | 6913772 |
| AgamP4_2L | 6942856 | 6943411 |
| AgamP4_2L | 6979318 | 6979920 |
| AgamP4_2L | 7492510 | 7493251 |
| AgamP4_2L | 7565645 | 7566152 |
| AgamP4_2L | 7594883 | 7595415 |
| AgamP4_2L | 7650981 | 7651531 |
| AgamP4_2L | 7790969 | 7791514 |
| AgamP4_2L | 7827828 | 7828463 |
| AgamP4_2L | 7965597 | 7966113 |
| AgamP4_2L | 7990367 | 7990956 |
| AgamP4_2L | 8113012 | 8113546 |
| AgamP4_2L | 8115522 | 8116054 |
| AgamP4_2L | 8127591 | 8128127 |
| AgamP4_2L | 8298315 | 8298836 |
| AgamP4_2L | 8304921 | 8305429 |

|           |          |          |
|-----------|----------|----------|
| AgamP4_2L | 8314476  | 8315013  |
| AgamP4_2L | 8330960  | 8331472  |
| AgamP4_2L | 8632608  | 8633153  |
| AgamP4_2L | 8706969  | 8707493  |
| AgamP4_2L | 8860051  | 8860552  |
| AgamP4_2L | 8867064  | 8867710  |
| AgamP4_2L | 9679287  | 9679855  |
| AgamP4_2L | 9730207  | 9730715  |
| AgamP4_2L | 9828915  | 9829421  |
| AgamP4_2L | 9863240  | 9863833  |
| AgamP4_2L | 9863975  | 9864617  |
| AgamP4_2L | 9940954  | 9941482  |
| AgamP4_2L | 10037486 | 10038017 |
| AgamP4_2L | 10118142 | 10118678 |
| AgamP4_2L | 10227903 | 10228558 |
| AgamP4_2L | 10300094 | 10300675 |
| AgamP4_2L | 10340530 | 10341044 |
| AgamP4_2L | 10501036 | 10501581 |
| AgamP4_2L | 10530954 | 10531786 |
| AgamP4_2L | 10582881 | 10583506 |
| AgamP4_2L | 10785828 | 10786358 |
| AgamP4_2L | 10847888 | 10848400 |
| AgamP4_2L | 10882083 | 10882630 |
| AgamP4_2L | 11026006 | 11026511 |
| AgamP4_2L | 11182996 | 11183588 |
| AgamP4_2L | 11378964 | 11379503 |
| AgamP4_2L | 11527730 | 11528244 |
| AgamP4_2L | 11801235 | 11801795 |
| AgamP4_2L | 11850539 | 11851193 |
| AgamP4_2L | 11866083 | 11866787 |
| AgamP4_2L | 11866583 | 11867291 |
| AgamP4_2L | 11918512 | 11919038 |
| AgamP4_2L | 11921002 | 11921540 |
| AgamP4_2L | 12072777 | 12073461 |
| AgamP4_2L | 12194807 | 12195319 |
| AgamP4_2L | 12210200 | 12210783 |
| AgamP4_2L | 12217775 | 12218289 |
| AgamP4_2L | 12411214 | 12411800 |
| AgamP4_2L | 12480016 | 12480574 |
| AgamP4_2L | 12535437 | 12535984 |
| AgamP4_2L | 12543843 | 12544360 |
| AgamP4_2L | 12559504 | 12560069 |
| AgamP4_2L | 12609648 | 12610156 |
| AgamP4_2L | 12628180 | 12628706 |
| AgamP4_2L | 12673931 | 12674474 |
| AgamP4_2L | 12713542 | 12714048 |
| AgamP4_2L | 12729125 | 12729632 |
| AgamP4_2L | 12788977 | 12789476 |
| AgamP4_2L | 12800615 | 12801134 |
| AgamP4_2L | 12898564 | 12899222 |

|           |          |          |
|-----------|----------|----------|
| AgamP4_2L | 13001046 | 13001616 |
| AgamP4_2L | 13120901 | 13121418 |
| AgamP4_2L | 13498571 | 13499160 |
| AgamP4_2L | 13604448 | 13605007 |
| AgamP4_2L | 13605473 | 13606131 |
| AgamP4_2L | 14035501 | 14036041 |
| AgamP4_2L | 14077756 | 14078285 |
| AgamP4_2L | 14379307 | 14379921 |
| AgamP4_2L | 14379828 | 14380429 |
| AgamP4_2L | 14517809 | 14518359 |
| AgamP4_2L | 14542810 | 14543387 |
| AgamP4_2L | 14591996 | 14592562 |
| AgamP4_2L | 14666077 | 14666697 |
| AgamP4_2L | 14688735 | 14689286 |
| AgamP4_2L | 14696066 | 14696613 |
| AgamP4_2L | 14719102 | 14719778 |
| AgamP4_2L | 14776478 | 14777120 |
| AgamP4_2L | 14831954 | 14832482 |
| AgamP4_2L | 14888289 | 14888879 |
| AgamP4_2L | 14931521 | 14932020 |
| AgamP4_2L | 14932021 | 14932525 |
| AgamP4_2L | 14958459 | 14959118 |
| AgamP4_2L | 15089905 | 15090527 |
| AgamP4_2L | 15096452 | 15097042 |
| AgamP4_2L | 15127844 | 15128426 |
| AgamP4_2L | 15181657 | 15182179 |
| AgamP4_2L | 15263267 | 15263794 |
| AgamP4_2L | 15271574 | 15272116 |
| AgamP4_2L | 15407025 | 15407598 |
| AgamP4_2L | 15428668 | 15429288 |
| AgamP4_2L | 15453084 | 15453599 |
| AgamP4_2L | 15505327 | 15505859 |
| AgamP4_2L | 15526995 | 15527508 |
| AgamP4_2L | 15540040 | 15540540 |
| AgamP4_2L | 15579240 | 15579756 |
| AgamP4_2L | 15582594 | 15583136 |
| AgamP4_2L | 15590302 | 15590874 |
| AgamP4_2L | 15608165 | 15608687 |
| AgamP4_2L | 15626747 | 15627294 |
| AgamP4_2L | 15945436 | 15946053 |
| AgamP4_2L | 16060007 | 16060533 |
| AgamP4_2L | 16242607 | 16243121 |
| AgamP4_2L | 16400104 | 16400604 |
| AgamP4_2L | 16419509 | 16420102 |
| AgamP4_2L | 16428474 | 16429018 |
| AgamP4_2L | 16429007 | 16429625 |
| AgamP4_2L | 16434966 | 16435699 |
| AgamP4_2L | 16435467 | 16436204 |
| AgamP4_2L | 16442866 | 16443423 |
| AgamP4_2L | 16605826 | 16606423 |

|           |          |          |
|-----------|----------|----------|
| AgamP4_2L | 16698817 | 16699335 |
| AgamP4_2L | 16852602 | 16853140 |
| AgamP4_2L | 16906002 | 16906507 |
| AgamP4_2L | 16936195 | 16936699 |
| AgamP4_2L | 16972430 | 16973439 |
| AgamP4_2L | 17076944 | 17077488 |
| AgamP4_2L | 17113475 | 17113993 |
| AgamP4_2L | 17395770 | 17396332 |
| AgamP4_2L | 17402313 | 17402926 |
| AgamP4_2L | 17433245 | 17433762 |
| AgamP4_2L | 17514234 | 17514809 |
| AgamP4_2L | 17580097 | 17580618 |
| AgamP4_2L | 17627543 | 17628194 |
| AgamP4_2L | 17656139 | 17656714 |
| AgamP4_2L | 17808017 | 17808517 |
| AgamP4_2L | 17899590 | 17900153 |
| AgamP4_2L | 17915330 | 17916030 |
| AgamP4_2L | 17954007 | 17954589 |
| AgamP4_2L | 18040776 | 18041279 |
| AgamP4_2L | 18248640 | 18249352 |
| AgamP4_2L | 18344357 | 18344861 |
| AgamP4_2L | 18388411 | 18388959 |
| AgamP4_2L | 18481626 | 18482142 |
| AgamP4_2L | 18485888 | 18486641 |
| AgamP4_2L | 18586944 | 18587503 |
| AgamP4_2L | 18637585 | 18638118 |
| AgamP4_2L | 18679803 | 18680304 |
| AgamP4_2L | 18723048 | 18723584 |
| AgamP4_2L | 18961292 | 18961881 |
| AgamP4_2L | 18966554 | 18967258 |
| AgamP4_2L | 18978409 | 18979118 |
| AgamP4_2L | 18989262 | 18989808 |
| AgamP4_2L | 18994263 | 18994776 |
| AgamP4_2L | 19005041 | 19005670 |
| AgamP4_2L | 19008636 | 19009192 |
| AgamP4_2L | 19011601 | 19012107 |
| AgamP4_2L | 19026889 | 19027406 |
| AgamP4_2L | 19218795 | 19219319 |
| AgamP4_2L | 19234424 | 19234962 |
| AgamP4_2L | 19239976 | 19240525 |
| AgamP4_2L | 19250525 | 19251039 |
| AgamP4_2L | 19357089 | 19357599 |
| AgamP4_2L | 19379043 | 19379549 |
| AgamP4_2L | 19463483 | 19464073 |
| AgamP4_2L | 19521072 | 19521604 |
| AgamP4_2L | 19521970 | 19522479 |
| AgamP4_2L | 19535563 | 19536106 |
| AgamP4_2L | 19654432 | 19654938 |
| AgamP4_2L | 19869224 | 19869723 |
| AgamP4_2L | 19876034 | 19876581 |

|           |          |          |
|-----------|----------|----------|
| AgamP4_2L | 19938688 | 19939199 |
| AgamP4_2L | 19947761 | 19948291 |
| AgamP4_2L | 20014837 | 20015377 |
| AgamP4_2L | 20099430 | 20100025 |
| AgamP4_2L | 20129987 | 20130500 |
| AgamP4_2L | 20204299 | 20204817 |
| AgamP4_2L | 20215758 | 20216265 |
| AgamP4_2L | 20218664 | 20219204 |
| AgamP4_2L | 20297232 | 20297751 |
| AgamP4_2L | 20344833 | 20345338 |
| AgamP4_2L | 20422499 | 20423038 |
| AgamP4_2L | 20475573 | 20476075 |
| AgamP4_2L | 20558830 | 20559418 |
| AgamP4_2L | 20564142 | 20564671 |
| AgamP4_2L | 20572203 | 20572718 |
| AgamP4_2L | 20640364 | 20640879 |
| AgamP4_2L | 20921710 | 20922398 |
| AgamP4_2L | 20962026 | 20962584 |
| AgamP4_2L | 20975924 | 20976620 |
| AgamP4_2L | 20996199 | 20996809 |
| AgamP4_2L | 21058107 | 21058643 |
| AgamP4_2L | 21059484 | 21060038 |
| AgamP4_2L | 21125818 | 21126374 |
| AgamP4_2L | 21207609 | 21208144 |
| AgamP4_2L | 21214682 | 21215218 |
| AgamP4_2L | 21307652 | 21308287 |
| AgamP4_2L | 21434490 | 21435179 |
| AgamP4_2L | 21622384 | 21623036 |
| AgamP4_2L | 21672876 | 21673419 |
| AgamP4_2L | 21686103 | 21686685 |
| AgamP4_2L | 21746449 | 21746956 |
| AgamP4_2L | 21776167 | 21776713 |
| AgamP4_2L | 21793229 | 21793755 |
| AgamP4_2L | 21826696 | 21827230 |
| AgamP4_2L | 21832945 | 21833471 |
| AgamP4_2L | 21836222 | 21836816 |
| AgamP4_2L | 21872570 | 21873126 |
| AgamP4_2L | 21923949 | 21924501 |
| AgamP4_2L | 22044896 | 22045412 |
| AgamP4_2L | 22055917 | 22056421 |
| AgamP4_2L | 22061281 | 22061782 |
| AgamP4_2L | 22068950 | 22069451 |
| AgamP4_2L | 22112150 | 22112712 |
| AgamP4_2L | 22125234 | 22125780 |
| AgamP4_2L | 22221092 | 22221718 |
| AgamP4_2L | 22228981 | 22229571 |
| AgamP4_2L | 22234870 | 22235378 |
| AgamP4_2L | 22279713 | 22280219 |
| AgamP4_2L | 22284982 | 22285551 |
| AgamP4_2L | 22386100 | 22386626 |

|           |          |          |
|-----------|----------|----------|
| AgamP4_2L | 22394271 | 22394875 |
| AgamP4_2L | 22427540 | 22428060 |
| AgamP4_2L | 22437511 | 22438020 |
| AgamP4_2L | 22475371 | 22475870 |
| AgamP4_2L | 22493932 | 22494448 |
| AgamP4_2L | 22501519 | 22502189 |
| AgamP4_2L | 22532225 | 22532735 |
| AgamP4_2L | 22532936 | 22533559 |
| AgamP4_2L | 22551706 | 22552349 |
| AgamP4_2L | 22598488 | 22599044 |
| AgamP4_2L | 22651046 | 22651575 |
| AgamP4_2L | 22657833 | 22658412 |
| AgamP4_2L | 22672025 | 22672706 |
| AgamP4_2L | 22706066 | 22706581 |
| AgamP4_2L | 22709906 | 22710407 |
| AgamP4_2L | 22800331 | 22800832 |
| AgamP4_2L | 22834400 | 22834973 |
| AgamP4_2L | 22871217 | 22871808 |
| AgamP4_2L | 22901583 | 22902119 |
| AgamP4_2L | 22994115 | 22994706 |
| AgamP4_2L | 23019001 | 23019533 |
| AgamP4_2L | 23051749 | 23052264 |
| AgamP4_2L | 23110987 | 23111554 |
| AgamP4_2L | 23133398 | 23134017 |
| AgamP4_2L | 23148704 | 23149208 |
| AgamP4_2L | 23150476 | 23150979 |
| AgamP4_2L | 23196494 | 23196999 |
| AgamP4_2L | 23198992 | 23199509 |
| AgamP4_2L | 23232314 | 23233067 |
| AgamP4_2L | 23373949 | 23374468 |
| AgamP4_2L | 23640950 | 23641463 |
| AgamP4_2L | 23654919 | 23655422 |
| AgamP4_2L | 23763784 | 23764304 |
| AgamP4_2L | 23788294 | 23788823 |
| AgamP4_2L | 23863131 | 23863776 |
| AgamP4_2L | 23949442 | 23949991 |
| AgamP4_2L | 23994163 | 23994754 |
| AgamP4_2L | 24062898 | 24063402 |
| AgamP4_2L | 24158651 | 24159320 |
| AgamP4_2L | 24163643 | 24164165 |
| AgamP4_2L | 24227306 | 24228305 |
| AgamP4_2L | 24239196 | 24239783 |
| AgamP4_2L | 24246754 | 24247274 |
| AgamP4_2L | 24247262 | 24247785 |
| AgamP4_2L | 24272663 | 24273273 |
| AgamP4_2L | 24307643 | 24308147 |
| AgamP4_2L | 24324700 | 24325199 |
| AgamP4_2L | 24346175 | 24346782 |
| AgamP4_2L | 24357721 | 24358304 |
| AgamP4_2L | 24374644 | 24375226 |

|           |          |          |
|-----------|----------|----------|
| AgamP4_2L | 24386619 | 24387185 |
| AgamP4_2L | 24446957 | 24447522 |
| AgamP4_2L | 24479127 | 24479779 |
| AgamP4_2L | 24482781 | 24483290 |
| AgamP4_2L | 24496970 | 24497552 |
| AgamP4_2L | 24566826 | 24567360 |
| AgamP4_2L | 24784171 | 24784689 |
| AgamP4_2L | 24957417 | 24957931 |
| AgamP4_2L | 24984811 | 24985505 |
| AgamP4_2L | 25018848 | 25019365 |
| AgamP4_2L | 25075194 | 25075801 |
| AgamP4_2L | 25104785 | 25105502 |
| AgamP4_2L | 25157018 | 25157565 |
| AgamP4_2L | 25298483 | 25299039 |
| AgamP4_2L | 25382973 | 25383478 |
| AgamP4_2L | 25383495 | 25383997 |
| AgamP4_2L | 25406868 | 25407376 |
| AgamP4_2L | 25411051 | 25411585 |
| AgamP4_2L | 25452612 | 25453153 |
| AgamP4_2L | 25460310 | 25461035 |
| AgamP4_2L | 25477544 | 25478155 |
| AgamP4_2L | 25526434 | 25526960 |
| AgamP4_2L | 25585759 | 25586426 |
| AgamP4_2L | 25590872 | 25591455 |
| AgamP4_2L | 25593405 | 25594024 |
| AgamP4_2L | 25630797 | 25631351 |
| AgamP4_2L | 25669618 | 25670308 |
| AgamP4_2L | 25866478 | 25867021 |
| AgamP4_2L | 25866986 | 25867528 |
| AgamP4_2L | 25953306 | 25953808 |
| AgamP4_2L | 25976920 | 25977441 |
| AgamP4_2L | 25999737 | 26000290 |
| AgamP4_2L | 26035318 | 26035844 |
| AgamP4_2L | 26061845 | 26062373 |
| AgamP4_2L | 26330096 | 26330648 |
| AgamP4_2L | 26402871 | 26403410 |
| AgamP4_2L | 26552441 | 26552991 |
| AgamP4_2L | 26579899 | 26580399 |
| AgamP4_2L | 26686999 | 26687604 |
| AgamP4_2L | 26696237 | 26696801 |
| AgamP4_2L | 26719573 | 26720096 |
| AgamP4_2L | 26744923 | 26745492 |
| AgamP4_2L | 26822627 | 26823208 |
| AgamP4_2L | 26844129 | 26844707 |
| AgamP4_2L | 26881335 | 26881871 |
| AgamP4_2L | 26890544 | 26891093 |
| AgamP4_2L | 26909477 | 26910003 |
| AgamP4_2L | 26962742 | 26963303 |
| AgamP4_2L | 27077327 | 27077924 |
| AgamP4_2L | 27085827 | 27086358 |

|           |          |          |
|-----------|----------|----------|
| AgamP4_2L | 27086915 | 27087421 |
| AgamP4_2L | 27087424 | 27087926 |
| AgamP4_2L | 27104065 | 27104590 |
| AgamP4_2L | 27108709 | 27109236 |
| AgamP4_2L | 27130652 | 27131164 |
| AgamP4_2L | 27210430 | 27211008 |
| AgamP4_2L | 27230818 | 27231388 |
| AgamP4_2L | 27281404 | 27281916 |
| AgamP4_2L | 27328981 | 27329994 |
| AgamP4_2L | 27509156 | 27509663 |
| AgamP4_2L | 27547060 | 27547639 |
| AgamP4_2L | 27572108 | 27572656 |
| AgamP4_2L | 27595370 | 27595904 |
| AgamP4_2L | 27601586 | 27602164 |
| AgamP4_2L | 27621467 | 27621990 |
| AgamP4_2L | 27646883 | 27647416 |
| AgamP4_2L | 27653236 | 27653750 |
| AgamP4_2L | 27912374 | 27913206 |
| AgamP4_2L | 27973608 | 27974113 |
| AgamP4_2L | 28236231 | 28236820 |
| AgamP4_2L | 28258646 | 28259147 |
| AgamP4_2L | 28265071 | 28265687 |
| AgamP4_2L | 28385559 | 28386097 |
| AgamP4_2L | 28576747 | 28577343 |
| AgamP4_2L | 28592690 | 28593209 |
| AgamP4_2L | 28603926 | 28604468 |
| AgamP4_2L | 28604474 | 28604973 |
| AgamP4_2L | 28645105 | 28645618 |
| AgamP4_2L | 28730614 | 28731196 |
| AgamP4_2L | 28782008 | 28782509 |
| AgamP4_2L | 28801854 | 28802361 |
| AgamP4_2L | 28911372 | 28911891 |
| AgamP4_2L | 28930717 | 28931297 |
| AgamP4_2L | 29004955 | 29005535 |
| AgamP4_2L | 29042005 | 29042507 |
| AgamP4_2L | 29159831 | 29160383 |
| AgamP4_2L | 29234457 | 29235075 |
| AgamP4_2L | 29305533 | 29306034 |
| AgamP4_2L | 29348584 | 29349108 |
| AgamP4_2L | 29439507 | 29440083 |
| AgamP4_2L | 29450093 | 29450685 |
| AgamP4_2L | 29594372 | 29594920 |
| AgamP4_2L | 29647737 | 29648282 |
| AgamP4_2L | 29702244 | 29702750 |
| AgamP4_2L | 29833787 | 29834324 |
| AgamP4_2L | 29876827 | 29877370 |
| AgamP4_2L | 29911047 | 29911557 |
| AgamP4_2L | 29922772 | 29923318 |
| AgamP4_2L | 30139858 | 30140361 |
| AgamP4_2L | 30142957 | 30143475 |

|           |          |          |
|-----------|----------|----------|
| AgamP4_2L | 30202238 | 30202814 |
| AgamP4_2L | 30333869 | 30334383 |
| AgamP4_2L | 30334369 | 30334887 |
| AgamP4_2L | 30379553 | 30380268 |
| AgamP4_2L | 30469685 | 30470375 |
| AgamP4_2L | 30470222 | 30470935 |
| AgamP4_2L | 30531163 | 30531699 |
| AgamP4_2L | 30531663 | 30532201 |
| AgamP4_2L | 30570541 | 30571205 |
| AgamP4_2L | 30581814 | 30582353 |
| AgamP4_2L | 30601865 | 30602416 |
| AgamP4_2L | 30723384 | 30723897 |
| AgamP4_2L | 30744458 | 30744959 |
| AgamP4_2L | 30770245 | 30770829 |
| AgamP4_2L | 30937766 | 30938554 |
| AgamP4_2L | 30980794 | 30981301 |
| AgamP4_2L | 31009573 | 31010098 |
| AgamP4_2L | 31031261 | 31031764 |
| AgamP4_2L | 31036766 | 31037336 |
| AgamP4_2L | 31059667 | 31060199 |
| AgamP4_2L | 31063369 | 31063935 |
| AgamP4_2L | 31108823 | 31109531 |
| AgamP4_2L | 31185412 | 31186043 |
| AgamP4_2L | 31189363 | 31189903 |
| AgamP4_2L | 31271368 | 31271870 |
| AgamP4_2L | 31277680 | 31278322 |
| AgamP4_2L | 31527685 | 31528282 |
| AgamP4_2L | 31609200 | 31609745 |
| AgamP4_2L | 31646160 | 31646684 |
| AgamP4_2L | 31706593 | 31707138 |
| AgamP4_2L | 31742464 | 31742993 |
| AgamP4_2L | 31745672 | 31746173 |
| AgamP4_2L | 31749107 | 31749705 |
| AgamP4_2L | 31808409 | 31808949 |
| AgamP4_2L | 32008872 | 32009426 |
| AgamP4_2L | 32049815 | 32050384 |
| AgamP4_2L | 32096990 | 32097503 |
| AgamP4_2L | 32134205 | 32134810 |
| AgamP4_2L | 32250692 | 32251253 |
| AgamP4_2L | 32256583 | 32257087 |
| AgamP4_2L | 32338601 | 32339222 |
| AgamP4_2L | 32352528 | 32353027 |
| AgamP4_2L | 32396393 | 32396953 |
| AgamP4_2L | 32432353 | 32432878 |
| AgamP4_2L | 32466438 | 32466944 |
| AgamP4_2L | 32656427 | 32656959 |
| AgamP4_2L | 32658726 | 32659300 |
| AgamP4_2L | 32693142 | 32693701 |
| AgamP4_2L | 32728710 | 32729402 |
| AgamP4_2L | 32740117 | 32740661 |

|           |          |          |
|-----------|----------|----------|
| AgamP4_2L | 32783603 | 32784141 |
| AgamP4_2L | 32784116 | 32784646 |
| AgamP4_2L | 33260996 | 33261520 |
| AgamP4_2L | 33265183 | 33265739 |
| AgamP4_2L | 33302074 | 33302610 |
| AgamP4_2L | 33306603 | 33307121 |
| AgamP4_2L | 33402244 | 33402757 |
| AgamP4_2L | 33405605 | 33406125 |
| AgamP4_2L | 33657085 | 33657591 |
| AgamP4_2L | 33696560 | 33697086 |
| AgamP4_2L | 33789049 | 33789606 |
| AgamP4_2L | 33796879 | 33797414 |
| AgamP4_2L | 33800843 | 33801471 |
| AgamP4_2L | 33932130 | 33932762 |
| AgamP4_2L | 33940103 | 33940738 |
| AgamP4_2L | 33982072 | 33982595 |
| AgamP4_2L | 34156171 | 34156709 |
| AgamP4_2L | 34171969 | 34172486 |
| AgamP4_2L | 34242552 | 34243071 |
| AgamP4_2L | 34307078 | 34307621 |
| AgamP4_2L | 34343122 | 34343760 |
| AgamP4_2L | 34577621 | 34578180 |
| AgamP4_2L | 34672145 | 34672655 |
| AgamP4_2L | 34688675 | 34689201 |
| AgamP4_2L | 34695504 | 34696121 |
| AgamP4_2L | 34713454 | 34713976 |
| AgamP4_2L | 34768793 | 34769339 |
| AgamP4_2L | 34788472 | 34789002 |
| AgamP4_2L | 34804052 | 34804585 |
| AgamP4_2L | 34814372 | 34814904 |
| AgamP4_2L | 34839387 | 34839955 |
| AgamP4_2L | 34885896 | 34886512 |
| AgamP4_2L | 34943918 | 34944529 |
| AgamP4_2L | 34989904 | 34990475 |
| AgamP4_2L | 35083331 | 35083848 |
| AgamP4_2L | 35323327 | 35323833 |
| AgamP4_2L | 35327085 | 35327756 |
| AgamP4_2L | 35482938 | 35483451 |
| AgamP4_2L | 35483656 | 35484159 |
| AgamP4_2L | 35586861 | 35587423 |
| AgamP4_2L | 35588276 | 35588888 |
| AgamP4_2L | 35594168 | 35594668 |
| AgamP4_2L | 35629775 | 35630305 |
| AgamP4_2L | 35682901 | 35683412 |
| AgamP4_2L | 35692984 | 35693601 |
| AgamP4_2L | 35694410 | 35694984 |
| AgamP4_2L | 35706089 | 35706601 |
| AgamP4_2L | 35866747 | 35867298 |
| AgamP4_2L | 35918768 | 35919271 |
| AgamP4_2L | 36005480 | 36006048 |

|           |          |          |
|-----------|----------|----------|
| AgamP4_2L | 36025935 | 36026467 |
| AgamP4_2L | 36026438 | 36026974 |
| AgamP4_2L | 36044685 | 36045251 |
| AgamP4_2L | 36049480 | 36050001 |
| AgamP4_2L | 36065030 | 36065712 |
| AgamP4_2L | 36065543 | 36066235 |
| AgamP4_2L | 36069167 | 36069737 |
| AgamP4_2L | 36080932 | 36081502 |
| AgamP4_2L | 36168733 | 36169237 |
| AgamP4_2L | 36182375 | 36182875 |
| AgamP4_2L | 36197122 | 36197629 |
| AgamP4_2L | 36230091 | 36230645 |
| AgamP4_2L | 36238362 | 36238977 |
| AgamP4_2L | 36316383 | 36316895 |
| AgamP4_2L | 36359612 | 36360152 |
| AgamP4_2L | 36389340 | 36389861 |
| AgamP4_2L | 36439950 | 36440522 |
| AgamP4_2L | 36450075 | 36450639 |
| AgamP4_2L | 36454217 | 36454721 |
| AgamP4_2L | 36463082 | 36463612 |
| AgamP4_2L | 36509503 | 36510018 |
| AgamP4_2L | 36512082 | 36512773 |
| AgamP4_2L | 36544781 | 36545302 |
| AgamP4_2L | 36592116 | 36592687 |
| AgamP4_2L | 36664785 | 36665352 |
| AgamP4_2L | 36675512 | 36676069 |
| AgamP4_2L | 36683643 | 36684160 |
| AgamP4_2L | 36788200 | 36788784 |
| AgamP4_2L | 36813369 | 36813901 |
| AgamP4_2L | 36842157 | 36842722 |
| AgamP4_2L | 36865163 | 36865683 |
| AgamP4_2L | 36866860 | 36867551 |
| AgamP4_2L | 36904394 | 36904972 |
| AgamP4_2L | 36960040 | 36960573 |
| AgamP4_2L | 37076601 | 37077102 |
| AgamP4_2L | 37142176 | 37142688 |
| AgamP4_2L | 37215607 | 37216176 |
| AgamP4_2L | 37222372 | 37222968 |
| AgamP4_2L | 37298163 | 37298747 |
| AgamP4_2L | 37424406 | 37425024 |
| AgamP4_2L | 37479987 | 37480522 |
| AgamP4_2L | 37493995 | 37494508 |
| AgamP4_2L | 37525580 | 37526140 |
| AgamP4_2L | 37672245 | 37672748 |
| AgamP4_2L | 37672750 | 37673426 |
| AgamP4_2L | 37697356 | 37697869 |
| AgamP4_2L | 37707258 | 37707801 |
| AgamP4_2L | 37722187 | 37722743 |
| AgamP4_2L | 37731645 | 37732144 |
| AgamP4_2L | 37744955 | 37745500 |

|           |          |          |
|-----------|----------|----------|
| AgamP4_2L | 37754955 | 37755503 |
| AgamP4_2L | 37769584 | 37770246 |
| AgamP4_2L | 37770625 | 37771138 |
| AgamP4_2L | 37775103 | 37775818 |
| AgamP4_2L | 37790264 | 37790774 |
| AgamP4_2L | 37826359 | 37826893 |
| AgamP4_2L | 37839880 | 37840391 |
| AgamP4_2L | 37918889 | 37919471 |
| AgamP4_2L | 37959183 | 37959717 |
| AgamP4_2L | 37963055 | 37963635 |
| AgamP4_2L | 38052579 | 38053301 |
| AgamP4_2L | 38060963 | 38061596 |
| AgamP4_2L | 38061465 | 38062126 |
| AgamP4_2L | 38062226 | 38062736 |
| AgamP4_2L | 38154838 | 38155402 |
| AgamP4_2L | 38285783 | 38286372 |
| AgamP4_2L | 38546711 | 38547279 |
| AgamP4_2L | 38551706 | 38552226 |
| AgamP4_2L | 38579728 | 38580307 |
| AgamP4_2L | 38588354 | 38588892 |
| AgamP4_2L | 38646572 | 38647094 |
| AgamP4_2L | 38654329 | 38654909 |
| AgamP4_2L | 38718201 | 38718730 |
| AgamP4_2L | 38824177 | 38824723 |
| AgamP4_2L | 38841915 | 38842577 |
| AgamP4_2L | 38847073 | 38847592 |
| AgamP4_2L | 38852037 | 38852574 |
| AgamP4_2L | 38879664 | 38880177 |
| AgamP4_2L | 38917878 | 38918397 |
| AgamP4_2L | 39027279 | 39027810 |
| AgamP4_2L | 39095841 | 39096443 |
| AgamP4_2L | 39124481 | 39124982 |
| AgamP4_2L | 39147113 | 39147694 |
| AgamP4_2L | 39149465 | 39150089 |
| AgamP4_2L | 39306086 | 39306620 |
| AgamP4_2L | 39331123 | 39331636 |
| AgamP4_2L | 39380344 | 39380874 |
| AgamP4_2L | 39387721 | 39388243 |
| AgamP4_2L | 39396760 | 39397298 |
| AgamP4_2L | 39434906 | 39435418 |
| AgamP4_2L | 39642992 | 39643525 |
| AgamP4_2L | 39645843 | 39646407 |
| AgamP4_2L | 39656687 | 39657228 |
| AgamP4_2L | 39676298 | 39676842 |
| AgamP4_2L | 39688564 | 39689161 |
| AgamP4_2L | 39699032 | 39699621 |
| AgamP4_2L | 39711120 | 39711753 |
| AgamP4_2L | 39772237 | 39772795 |
| AgamP4_2L | 39828652 | 39829220 |
| AgamP4_2L | 39862251 | 39862842 |

|           |          |          |
|-----------|----------|----------|
| AgamP4_2L | 39893244 | 39893756 |
| AgamP4_2L | 39935017 | 39935731 |
| AgamP4_2L | 39962849 | 39963396 |
| AgamP4_2L | 40024807 | 40025531 |
| AgamP4_2L | 40076508 | 40077030 |
| AgamP4_2L | 40268938 | 40269469 |
| AgamP4_2L | 40321792 | 40322360 |
| AgamP4_2L | 40353851 | 40354368 |
| AgamP4_2L | 40427895 | 40428430 |
| AgamP4_2L | 40529469 | 40530025 |
| AgamP4_2L | 40538903 | 40539536 |
| AgamP4_2L | 40629465 | 40629974 |
| AgamP4_2L | 40751714 | 40752255 |
| AgamP4_2L | 40923135 | 40923717 |
| AgamP4_2L | 40941556 | 40942190 |
| AgamP4_2L | 40943468 | 40944086 |
| AgamP4_2L | 40986883 | 40987401 |
| AgamP4_2L | 41109142 | 41109657 |
| AgamP4_2L | 41303019 | 41303527 |
| AgamP4_2L | 41333102 | 41333717 |
| AgamP4_2L | 41382692 | 41383414 |
| AgamP4_2L | 41410272 | 41410808 |
| AgamP4_2L | 41489176 | 41489722 |
| AgamP4_2L | 41510787 | 41511302 |
| AgamP4_2L | 41513599 | 41514175 |
| AgamP4_2L | 41532579 | 41533127 |
| AgamP4_2L | 41623777 | 41624334 |
| AgamP4_2L | 41716724 | 41717232 |
| AgamP4_2L | 41729411 | 41730112 |
| AgamP4_2L | 41732814 | 41733335 |
| AgamP4_2L | 41809557 | 41810116 |
| AgamP4_2L | 41822211 | 41822718 |
| AgamP4_2L | 41873775 | 41874329 |
| AgamP4_2L | 42168402 | 42168965 |
| AgamP4_2L | 42222670 | 42223193 |
| AgamP4_2L | 42262579 | 42263096 |
| AgamP4_2L | 42346639 | 42347266 |
| AgamP4_2L | 42355939 | 42356456 |
| AgamP4_2L | 42429417 | 42429938 |
| AgamP4_2L | 42459293 | 42459931 |
| AgamP4_2L | 42573021 | 42573568 |
| AgamP4_2L | 42578958 | 42579557 |
| AgamP4_2L | 42639603 | 42640198 |
| AgamP4_2L | 42649086 | 42649599 |
| AgamP4_2L | 42661649 | 42662185 |
| AgamP4_2L | 42745670 | 42746212 |
| AgamP4_2L | 42814818 | 42815355 |
| AgamP4_2L | 42865808 | 42866351 |
| AgamP4_2L | 43046507 | 43047110 |
| AgamP4_2L | 43089522 | 43090079 |

|           |          |          |
|-----------|----------|----------|
| AgamP4_2L | 43112362 | 43112897 |
| AgamP4_2L | 43139683 | 43140214 |
| AgamP4_2L | 43223707 | 43224451 |
| AgamP4_2L | 43285654 | 43286202 |
| AgamP4_2L | 43311705 | 43312314 |
| AgamP4_2L | 43485806 | 43486310 |
| AgamP4_2L | 43493471 | 43494092 |
| AgamP4_2L | 43654420 | 43655138 |
| AgamP4_2L | 43676425 | 43676950 |
| AgamP4_2L | 43775549 | 43776126 |
| AgamP4_2L | 43783613 | 43784125 |
| AgamP4_2L | 43797947 | 43798484 |
| AgamP4_2L | 43807517 | 43808030 |
| AgamP4_2L | 43837165 | 43837678 |
| AgamP4_2L | 43848548 | 43849176 |
| AgamP4_2L | 43853273 | 43853869 |
| AgamP4_2L | 43876577 | 43877095 |
| AgamP4_2L | 43900108 | 43900708 |
| AgamP4_2L | 43932083 | 43932823 |
| AgamP4_2L | 43969320 | 43969835 |
| AgamP4_2L | 44007070 | 44007584 |
| AgamP4_2L | 44042149 | 44042658 |
| AgamP4_2L | 44088200 | 44088853 |
| AgamP4_2L | 44089159 | 44089700 |
| AgamP4_2L | 44096688 | 44097212 |
| AgamP4_2L | 44144666 | 44145426 |
| AgamP4_2L | 44286145 | 44286717 |
| AgamP4_2L | 44347781 | 44348333 |
| AgamP4_2L | 44471570 | 44472072 |
| AgamP4_2L | 44483620 | 44484166 |
| AgamP4_2L | 44617917 | 44618431 |
| AgamP4_2L | 44621135 | 44621639 |
| AgamP4_2L | 44630495 | 44631044 |
| AgamP4_2L | 44678958 | 44679541 |
| AgamP4_2L | 44716516 | 44717073 |
| AgamP4_2L | 44725251 | 44725915 |
| AgamP4_2L | 44742143 | 44742719 |
| AgamP4_2L | 44746972 | 44747517 |
| AgamP4_2L | 44872098 | 44872604 |
| AgamP4_2L | 44897980 | 44898485 |
| AgamP4_2L | 44923365 | 44923884 |
| AgamP4_2L | 45042640 | 45043168 |
| AgamP4_2L | 45262112 | 45262673 |
| AgamP4_2L | 45304504 | 45305041 |
| AgamP4_2L | 45327724 | 45328268 |
| AgamP4_2L | 45387908 | 45388473 |
| AgamP4_2L | 45468460 | 45468964 |
| AgamP4_2L | 45472460 | 45472997 |
| AgamP4_2L | 45494400 | 45494941 |
| AgamP4_2L | 45527509 | 45528043 |

|           |          |          |
|-----------|----------|----------|
| AgamP4_2L | 45578064 | 45578596 |
| AgamP4_2L | 45629705 | 45630326 |
| AgamP4_2L | 45653770 | 45654304 |
| AgamP4_2L | 45742137 | 45742761 |
| AgamP4_2L | 45744416 | 45744992 |
| AgamP4_2L | 45774905 | 45775444 |
| AgamP4_2L | 45831659 | 45832206 |
| AgamP4_2L | 45860676 | 45861233 |
| AgamP4_2L | 45919359 | 45919860 |
| AgamP4_2L | 46070237 | 46070826 |
| AgamP4_2L | 46169468 | 46170026 |
| AgamP4_2L | 46218551 | 46219104 |
| AgamP4_2L | 46229521 | 46230022 |
| AgamP4_2L | 46297888 | 46298424 |
| AgamP4_2L | 46304612 | 46305130 |
| AgamP4_2L | 46530411 | 46530934 |
| AgamP4_2L | 46534993 | 46535551 |
| AgamP4_2L | 46535495 | 46536067 |
| AgamP4_2L | 46596154 | 46596659 |
| AgamP4_2L | 46616803 | 46617343 |
| AgamP4_2L | 46653543 | 46654067 |
| AgamP4_2L | 46808694 | 46809231 |
| AgamP4_2L | 46839907 | 46840425 |
| AgamP4_2L | 46912287 | 46912847 |
| AgamP4_2L | 46923381 | 46923893 |
| AgamP4_2L | 47003068 | 47003620 |
| AgamP4_2L | 47009038 | 47009617 |
| AgamP4_2L | 47033870 | 47034460 |
| AgamP4_2L | 47049383 | 47049973 |
| AgamP4_2L | 47112053 | 47112628 |
| AgamP4_2L | 47118297 | 47118883 |
| AgamP4_2L | 47122673 | 47123289 |
| AgamP4_2L | 47152630 | 47153388 |
| AgamP4_2L | 47173555 | 47174064 |
| AgamP4_2L | 47211395 | 47211931 |
| AgamP4_2L | 47304647 | 47305175 |
| AgamP4_2L | 47349000 | 47349684 |
| AgamP4_2L | 47384883 | 47385453 |
| AgamP4_2L | 47440263 | 47440773 |
| AgamP4_2L | 47489657 | 47490174 |
| AgamP4_2L | 47493569 | 47494260 |
| AgamP4_2L | 47737288 | 47737922 |
| AgamP4_2L | 47741874 | 47742530 |
| AgamP4_2L | 47764466 | 47764988 |
| AgamP4_2L | 47767798 | 47768332 |
| AgamP4_2L | 47795638 | 47796174 |
| AgamP4_2L | 47831263 | 47831762 |
| AgamP4_2L | 47852803 | 47853330 |
| AgamP4_2L | 48140016 | 48140548 |
| AgamP4_2L | 48147526 | 48148087 |

|           |          |          |
|-----------|----------|----------|
| AgamP4_2L | 48163341 | 48163917 |
| AgamP4_2L | 48178595 | 48179104 |
| AgamP4_2L | 48238774 | 48239375 |
| AgamP4_2L | 48343087 | 48343589 |
| AgamP4_2L | 48404222 | 48404750 |
| AgamP4_2L | 48414524 | 48415057 |
| AgamP4_2L | 48474399 | 48475406 |
| AgamP4_2L | 48476271 | 48476810 |
| AgamP4_2L | 48517909 | 48518479 |
| AgamP4_2L | 48518787 | 48519288 |
| AgamP4_2L | 48538111 | 48538697 |
| AgamP4_2L | 48561205 | 48561891 |
| AgamP4_2L | 48565927 | 48566508 |
| AgamP4_2L | 48568025 | 48568759 |
| AgamP4_2L | 48568761 | 48569268 |
| AgamP4_2L | 48570457 | 48571074 |
| AgamP4_2L | 48579743 | 48580472 |
| AgamP4_2L | 48608653 | 48609272 |
| AgamP4_2L | 48609157 | 48609855 |
| AgamP4_2L | 48758746 | 48759246 |
| AgamP4_2L | 48761181 | 48761761 |
| AgamP4_2L | 48927642 | 48928173 |
| AgamP4_2L | 48948392 | 48949025 |
| AgamP4_2L | 48966806 | 48967347 |
| AgamP4_2L | 48975685 | 48976221 |
| AgamP4_2L | 49039776 | 49040343 |
| AgamP4_2L | 49136061 | 49136628 |
| AgamP4_2R | 348492   | 349052   |
| AgamP4_2R | 548405   | 548917   |
| AgamP4_2R | 574429   | 574948   |
| AgamP4_2R | 694737   | 695404   |
| AgamP4_2R | 731375   | 732075   |
| AgamP4_2R | 755640   | 756216   |
| AgamP4_2R | 779433   | 779948   |
| AgamP4_2R | 910015   | 910561   |
| AgamP4_2R | 987935   | 988457   |
| AgamP4_2R | 1005252  | 1005763  |
| AgamP4_2R | 1045108  | 1045706  |
| AgamP4_2R | 1062781  | 1063377  |
| AgamP4_2R | 1066012  | 1066760  |
| AgamP4_2R | 1139185  | 1139703  |
| AgamP4_2R | 1166460  | 1167014  |
| AgamP4_2R | 1231107  | 1231695  |
| AgamP4_2R | 1302917  | 1303423  |
| AgamP4_2R | 1320359  | 1320866  |
| AgamP4_2R | 1325380  | 1325911  |
| AgamP4_2R | 1372872  | 1373376  |
| AgamP4_2R | 1376838  | 1377386  |
| AgamP4_2R | 1443464  | 1443979  |
| AgamP4_2R | 1466636  | 1467144  |

|           |         |         |
|-----------|---------|---------|
| AgamP4_2R | 1482907 | 1483489 |
| AgamP4_2R | 1486264 | 1486911 |
| AgamP4_2R | 1497770 | 1498284 |
| AgamP4_2R | 1509747 | 1510269 |
| AgamP4_2R | 1561463 | 1562043 |
| AgamP4_2R | 1581748 | 1582464 |
| AgamP4_2R | 1586363 | 1586885 |
| AgamP4_2R | 1678270 | 1678780 |
| AgamP4_2R | 1750556 | 1751075 |
| AgamP4_2R | 1762566 | 1763076 |
| AgamP4_2R | 1770564 | 1771073 |
| AgamP4_2R | 1889814 | 1890405 |
| AgamP4_2R | 1933576 | 1934079 |
| AgamP4_2R | 1939825 | 1940393 |
| AgamP4_2R | 1968494 | 1969054 |
| AgamP4_2R | 1995832 | 1996342 |
| AgamP4_2R | 2057866 | 2058539 |
| AgamP4_2R | 2070888 | 2071448 |
| AgamP4_2R | 2071401 | 2071971 |
| AgamP4_2R | 2170725 | 2171243 |
| AgamP4_2R | 2173852 | 2174383 |
| AgamP4_2R | 2176882 | 2177448 |
| AgamP4_2R | 2231641 | 2232251 |
| AgamP4_2R | 2277880 | 2278620 |
| AgamP4_2R | 2320246 | 2320841 |
| AgamP4_2R | 2325319 | 2325859 |
| AgamP4_2R | 2486388 | 2486992 |
| AgamP4_2R | 2487709 | 2488276 |
| AgamP4_2R | 2616272 | 2616962 |
| AgamP4_2R | 2647154 | 2647661 |
| AgamP4_2R | 2652915 | 2653449 |
| AgamP4_2R | 2685127 | 2685702 |
| AgamP4_2R | 2702713 | 2703247 |
| AgamP4_2R | 2874972 | 2875480 |
| AgamP4_2R | 2875476 | 2875986 |
| AgamP4_2R | 2899395 | 2900076 |
| AgamP4_2R | 2943166 | 2943723 |
| AgamP4_2R | 2977241 | 2977791 |
| AgamP4_2R | 3021030 | 3021558 |
| AgamP4_2R | 3026385 | 3027019 |
| AgamP4_2R | 3097099 | 3097907 |
| AgamP4_2R | 3263135 | 3263781 |
| AgamP4_2R | 3352703 | 3353241 |
| AgamP4_2R | 3385493 | 3386055 |
| AgamP4_2R | 3404933 | 3405450 |
| AgamP4_2R | 3538413 | 3538929 |
| AgamP4_2R | 3555662 | 3556377 |
| AgamP4_2R | 3566451 | 3567142 |
| AgamP4_2R | 3616006 | 3616555 |
| AgamP4_2R | 3714111 | 3714672 |

|           |         |         |
|-----------|---------|---------|
| AgamP4_2R | 3742029 | 3742548 |
| AgamP4_2R | 3874660 | 3875181 |
| AgamP4_2R | 3979025 | 3979541 |
| AgamP4_2R | 3985028 | 3985550 |
| AgamP4_2R | 4027107 | 4027608 |
| AgamP4_2R | 4047809 | 4048324 |
| AgamP4_2R | 4059414 | 4059924 |
| AgamP4_2R | 4062087 | 4062704 |
| AgamP4_2R | 4132796 | 4133305 |
| AgamP4_2R | 4148433 | 4148980 |
| AgamP4_2R | 4151059 | 4151583 |
| AgamP4_2R | 4195971 | 4196521 |
| AgamP4_2R | 4236783 | 4237374 |
| AgamP4_2R | 4257130 | 4257738 |
| AgamP4_2R | 4299853 | 4300387 |
| AgamP4_2R | 4417154 | 4417673 |
| AgamP4_2R | 4435962 | 4436515 |
| AgamP4_2R | 4491713 | 4492271 |
| AgamP4_2R | 4494778 | 4495342 |
| AgamP4_2R | 4495408 | 4495914 |
| AgamP4_2R | 4496810 | 4497361 |
| AgamP4_2R | 4600201 | 4600710 |
| AgamP4_2R | 4611801 | 4612440 |
| AgamP4_2R | 4721988 | 4722544 |
| AgamP4_2R | 4772407 | 4773133 |
| AgamP4_2R | 4772908 | 4773633 |
| AgamP4_2R | 4794709 | 4795211 |
| AgamP4_2R | 4798717 | 4799229 |
| AgamP4_2R | 4803791 | 4804303 |
| AgamP4_2R | 4815527 | 4816026 |
| AgamP4_2R | 4819865 | 4820407 |
| AgamP4_2R | 4835846 | 4836363 |
| AgamP4_2R | 4856079 | 4856586 |
| AgamP4_2R | 4902924 | 4903432 |
| AgamP4_2R | 4942983 | 4943533 |
| AgamP4_2R | 4970202 | 4970740 |
| AgamP4_2R | 5052282 | 5052809 |
| AgamP4_2R | 5108095 | 5108596 |
| AgamP4_2R | 5113801 | 5114344 |
| AgamP4_2R | 5138689 | 5139226 |
| AgamP4_2R | 5158347 | 5158881 |
| AgamP4_2R | 5193341 | 5193901 |
| AgamP4_2R | 5202870 | 5203423 |
| AgamP4_2R | 5217723 | 5218285 |
| AgamP4_2R | 5310850 | 5311382 |
| AgamP4_2R | 5315120 | 5315746 |
| AgamP4_2R | 5330340 | 5330846 |
| AgamP4_2R | 5354276 | 5354780 |
| AgamP4_2R | 5354786 | 5355414 |
| AgamP4_2R | 5387521 | 5388051 |

|           |         |         |
|-----------|---------|---------|
| AgamP4_2R | 5400699 | 5401204 |
| AgamP4_2R | 5466224 | 5466889 |
| AgamP4_2R | 5530499 | 5531201 |
| AgamP4_2R | 5567690 | 5568238 |
| AgamP4_2R | 5604303 | 5604891 |
| AgamP4_2R | 5629951 | 5630481 |
| AgamP4_2R | 5673893 | 5674400 |
| AgamP4_2R | 5704349 | 5704870 |
| AgamP4_2R | 5727333 | 5727984 |
| AgamP4_2R | 5800017 | 5800554 |
| AgamP4_2R | 5804886 | 5805399 |
| AgamP4_2R | 5834931 | 5835831 |
| AgamP4_2R | 5979783 | 5980357 |
| AgamP4_2R | 5980311 | 5980938 |
| AgamP4_2R | 6011297 | 6011812 |
| AgamP4_2R | 6167369 | 6167873 |
| AgamP4_2R | 6272156 | 6272690 |
| AgamP4_2R | 6296965 | 6297470 |
| AgamP4_2R | 6297472 | 6297982 |
| AgamP4_2R | 6297982 | 6298506 |
| AgamP4_2R | 6306967 | 6307574 |
| AgamP4_2R | 6369721 | 6370246 |
| AgamP4_2R | 6501876 | 6502606 |
| AgamP4_2R | 6502382 | 6503120 |
| AgamP4_2R | 6533709 | 6534213 |
| AgamP4_2R | 6604140 | 6604677 |
| AgamP4_2R | 6665811 | 6666387 |
| AgamP4_2R | 6669362 | 6669878 |
| AgamP4_2R | 6747153 | 6747663 |
| AgamP4_2R | 6800650 | 6801173 |
| AgamP4_2R | 6801170 | 6801679 |
| AgamP4_2R | 6811425 | 6811973 |
| AgamP4_2R | 6853537 | 6854162 |
| AgamP4_2R | 7049772 | 7050292 |
| AgamP4_2R | 7056136 | 7056746 |
| AgamP4_2R | 7219155 | 7219678 |
| AgamP4_2R | 7317629 | 7318153 |
| AgamP4_2R | 7344913 | 7345468 |
| AgamP4_2R | 7348670 | 7349240 |
| AgamP4_2R | 7487865 | 7488364 |
| AgamP4_2R | 7488367 | 7488879 |
| AgamP4_2R | 7587661 | 7588220 |
| AgamP4_2R | 7594515 | 7595075 |
| AgamP4_2R | 7657503 | 7658029 |
| AgamP4_2R | 7676377 | 7676941 |
| AgamP4_2R | 7677107 | 7677661 |
| AgamP4_2R | 7720485 | 7721079 |
| AgamP4_2R | 7745878 | 7746460 |
| AgamP4_2R | 7795337 | 7796111 |
| AgamP4_2R | 7868065 | 7868597 |

|           |          |          |
|-----------|----------|----------|
| AgamP4_2R | 7931023  | 7931844  |
| AgamP4_2R | 8152232  | 8152814  |
| AgamP4_2R | 8157996  | 8158505  |
| AgamP4_2R | 8239783  | 8240329  |
| AgamP4_2R | 8275778  | 8276323  |
| AgamP4_2R | 8388433  | 8388939  |
| AgamP4_2R | 8402771  | 8403270  |
| AgamP4_2R | 8453834  | 8454587  |
| AgamP4_2R | 8502125  | 8502689  |
| AgamP4_2R | 8805781  | 8806281  |
| AgamP4_2R | 8860946  | 8861448  |
| AgamP4_2R | 8992262  | 8992765  |
| AgamP4_2R | 8998858  | 8999368  |
| AgamP4_2R | 9060647  | 9061301  |
| AgamP4_2R | 9063050  | 9063647  |
| AgamP4_2R | 9063933  | 9064556  |
| AgamP4_2R | 9227033  | 9227650  |
| AgamP4_2R | 9245670  | 9246205  |
| AgamP4_2R | 9380622  | 9381313  |
| AgamP4_2R | 9388892  | 9389503  |
| AgamP4_2R | 9473108  | 9473642  |
| AgamP4_2R | 9491241  | 9491828  |
| AgamP4_2R | 9501544  | 9502276  |
| AgamP4_2R | 9503753  | 9504277  |
| AgamP4_2R | 9545419  | 9545965  |
| AgamP4_2R | 9907026  | 9907589  |
| AgamP4_2R | 9918203  | 9918703  |
| AgamP4_2R | 9989371  | 9989870  |
| AgamP4_2R | 10013028 | 10013636 |
| AgamP4_2R | 10084896 | 10085583 |
| AgamP4_2R | 10165932 | 10166451 |
| AgamP4_2R | 10166449 | 10166963 |
| AgamP4_2R | 10171929 | 10172442 |
| AgamP4_2R | 10195727 | 10196261 |
| AgamP4_2R | 10289176 | 10289696 |
| AgamP4_2R | 10294780 | 10295340 |
| AgamP4_2R | 10319211 | 10319750 |
| AgamP4_2R | 10336934 | 10337587 |
| AgamP4_2R | 10345304 | 10345850 |
| AgamP4_2R | 10373525 | 10374024 |
| AgamP4_2R | 10393283 | 10393883 |
| AgamP4_2R | 10407907 | 10408425 |
| AgamP4_2R | 10490733 | 10491404 |
| AgamP4_2R | 10582490 | 10583060 |
| AgamP4_2R | 10583757 | 10584282 |
| AgamP4_2R | 10758149 | 10758661 |
| AgamP4_2R | 10880682 | 10881301 |
| AgamP4_2R | 10885590 | 10886110 |
| AgamP4_2R | 10932819 | 10933406 |
| AgamP4_2R | 10973892 | 10974593 |

|           |          |          |
|-----------|----------|----------|
| AgamP4_2R | 10976533 | 10977034 |
| AgamP4_2R | 10987308 | 10987893 |
| AgamP4_2R | 11057101 | 11057710 |
| AgamP4_2R | 11099279 | 11099844 |
| AgamP4_2R | 11127372 | 11127949 |
| AgamP4_2R | 11136860 | 11137435 |
| AgamP4_2R | 11140139 | 11140721 |
| AgamP4_2R | 11175327 | 11175854 |
| AgamP4_2R | 11287231 | 11287763 |
| AgamP4_2R | 11351475 | 11352076 |
| AgamP4_2R | 11483277 | 11483875 |
| AgamP4_2R | 11500470 | 11501043 |
| AgamP4_2R | 11540543 | 11541046 |
| AgamP4_2R | 11556756 | 11557296 |
| AgamP4_2R | 11566273 | 11566925 |
| AgamP4_2R | 11661635 | 11662249 |
| AgamP4_2R | 11666236 | 11666809 |
| AgamP4_2R | 11667323 | 11667834 |
| AgamP4_2R | 11691860 | 11692499 |
| AgamP4_2R | 11733914 | 11734416 |
| AgamP4_2R | 11743919 | 11744494 |
| AgamP4_2R | 11752107 | 11752634 |
| AgamP4_2R | 11811433 | 11811979 |
| AgamP4_2R | 11848752 | 11849287 |
| AgamP4_2R | 11855554 | 11856081 |
| AgamP4_2R | 11900999 | 11901516 |
| AgamP4_2R | 11944360 | 11944880 |
| AgamP4_2R | 12019763 | 12020390 |
| AgamP4_2R | 12199705 | 12200212 |
| AgamP4_2R | 12226699 | 12227328 |
| AgamP4_2R | 12380384 | 12381107 |
| AgamP4_2R | 12484008 | 12484577 |
| AgamP4_2R | 12491685 | 12492233 |
| AgamP4_2R | 12536821 | 12537321 |
| AgamP4_2R | 12564650 | 12565155 |
| AgamP4_2R | 12602086 | 12602750 |
| AgamP4_2R | 12680972 | 12681494 |
| AgamP4_2R | 12689967 | 12690643 |
| AgamP4_2R | 12777628 | 12778151 |
| AgamP4_2R | 12828484 | 12829015 |
| AgamP4_2R | 12850320 | 12850825 |
| AgamP4_2R | 12864393 | 12864934 |
| AgamP4_2R | 12865836 | 12866405 |
| AgamP4_2R | 12898844 | 12899355 |
| AgamP4_2R | 12900310 | 12900855 |
| AgamP4_2R | 12912343 | 12912893 |
| AgamP4_2R | 12915028 | 12915639 |
| AgamP4_2R | 13027769 | 13028343 |
| AgamP4_2R | 13033547 | 13034175 |
| AgamP4_2R | 13222232 | 13222878 |

|           |          |          |
|-----------|----------|----------|
| AgamP4_2R | 13326892 | 13327398 |
| AgamP4_2R | 13329332 | 13329887 |
| AgamP4_2R | 13330847 | 13331401 |
| AgamP4_2R | 13356374 | 13356897 |
| AgamP4_2R | 13387804 | 13388513 |
| AgamP4_2R | 13484220 | 13484748 |
| AgamP4_2R | 13565674 | 13566206 |
| AgamP4_2R | 13567985 | 13568543 |
| AgamP4_2R | 13573068 | 13573607 |
| AgamP4_2R | 13590689 | 13591231 |
| AgamP4_2R | 13818183 | 13818701 |
| AgamP4_2R | 13862075 | 13862577 |
| AgamP4_2R | 13878951 | 13879489 |
| AgamP4_2R | 13924870 | 13925424 |
| AgamP4_2R | 13938178 | 13938921 |
| AgamP4_2R | 14002768 | 14003333 |
| AgamP4_2R | 14066609 | 14067337 |
| AgamP4_2R | 14108219 | 14108762 |
| AgamP4_2R | 14108724 | 14109263 |
| AgamP4_2R | 14120802 | 14121325 |
| AgamP4_2R | 14135696 | 14136271 |
| AgamP4_2R | 14136198 | 14136774 |
| AgamP4_2R | 14146643 | 14147274 |
| AgamP4_2R | 14174571 | 14175158 |
| AgamP4_2R | 14177118 | 14177729 |
| AgamP4_2R | 14313839 | 14314394 |
| AgamP4_2R | 14362450 | 14362972 |
| AgamP4_2R | 14370316 | 14370910 |
| AgamP4_2R | 14373194 | 14373717 |
| AgamP4_2R | 14504612 | 14505123 |
| AgamP4_2R | 14669484 | 14669986 |
| AgamP4_2R | 14670792 | 14671375 |
| AgamP4_2R | 14723749 | 14724263 |
| AgamP4_2R | 14745235 | 14745828 |
| AgamP4_2R | 14789324 | 14789932 |
| AgamP4_2R | 14805069 | 14805607 |
| AgamP4_2R | 14871040 | 14871625 |
| AgamP4_2R | 14897690 | 14898330 |
| AgamP4_2R | 14966936 | 14967441 |
| AgamP4_2R | 14969393 | 14970012 |
| AgamP4_2R | 15012416 | 15012964 |
| AgamP4_2R | 15020539 | 15021074 |
| AgamP4_2R | 15419500 | 15420006 |
| AgamP4_2R | 15433249 | 15433806 |
| AgamP4_2R | 15518094 | 15518646 |
| AgamP4_2R | 15527313 | 15527852 |
| AgamP4_2R | 15549956 | 15550486 |
| AgamP4_2R | 15639749 | 15640395 |
| AgamP4_2R | 15668194 | 15668703 |
| AgamP4_2R | 15747969 | 15748502 |

|           |          |          |
|-----------|----------|----------|
| AgamP4_2R | 15774870 | 15775449 |
| AgamP4_2R | 15854323 | 15854852 |
| AgamP4_2R | 15866577 | 15867111 |
| AgamP4_2R | 15983873 | 15984534 |
| AgamP4_2R | 16006592 | 16007188 |
| AgamP4_2R | 16022984 | 16023493 |
| AgamP4_2R | 16141731 | 16142306 |
| AgamP4_2R | 16301056 | 16301585 |
| AgamP4_2R | 16382066 | 16382569 |
| AgamP4_2R | 16421211 | 16421717 |
| AgamP4_2R | 16448678 | 16449230 |
| AgamP4_2R | 16556251 | 16556777 |
| AgamP4_2R | 16613792 | 16614321 |
| AgamP4_2R | 16620869 | 16621382 |
| AgamP4_2R | 16621382 | 16621886 |
| AgamP4_2R | 16631373 | 16631975 |
| AgamP4_2R | 16632384 | 16632930 |
| AgamP4_2R | 16708633 | 16709200 |
| AgamP4_2R | 16743610 | 16744260 |
| AgamP4_2R | 16744232 | 16744990 |
| AgamP4_2R | 16766057 | 16766567 |
| AgamP4_2R | 16895421 | 16895924 |
| AgamP4_2R | 16952462 | 16953057 |
| AgamP4_2R | 17058129 | 17058653 |
| AgamP4_2R | 17102897 | 17103424 |
| AgamP4_2R | 17296681 | 17297279 |
| AgamP4_2R | 17324531 | 17325081 |
| AgamP4_2R | 17613691 | 17614212 |
| AgamP4_2R | 17686745 | 17687348 |
| AgamP4_2R | 17807103 | 17807783 |
| AgamP4_2R | 17976400 | 17977032 |
| AgamP4_2R | 18057599 | 18058235 |
| AgamP4_2R | 18137499 | 18138068 |
| AgamP4_2R | 18190885 | 18191434 |
| AgamP4_2R | 18238888 | 18239468 |
| AgamP4_2R | 18268621 | 18269162 |
| AgamP4_2R | 18271918 | 18272465 |
| AgamP4_2R | 18277826 | 18278334 |
| AgamP4_2R | 18291629 | 18292170 |
| AgamP4_2R | 18295279 | 18295803 |
| AgamP4_2R | 18350911 | 18351416 |
| AgamP4_2R | 18352697 | 18353215 |
| AgamP4_2R | 18353558 | 18354084 |
| AgamP4_2R | 18356162 | 18356661 |
| AgamP4_2R | 18364933 | 18365437 |
| AgamP4_2R | 18368941 | 18369459 |
| AgamP4_2R | 18465067 | 18465570 |
| AgamP4_2R | 18564836 | 18565389 |
| AgamP4_2R | 18578814 | 18579315 |
| AgamP4_2R | 18634457 | 18635037 |

|           |          |          |
|-----------|----------|----------|
| AgamP4_2R | 18714493 | 18715048 |
| AgamP4_2R | 18717596 | 18718146 |
| AgamP4_2R | 18816750 | 18817259 |
| AgamP4_2R | 18887275 | 18887978 |
| AgamP4_2R | 18985121 | 18985624 |
| AgamP4_2R | 19024193 | 19024829 |
| AgamP4_2R | 19229891 | 19230468 |
| AgamP4_2R | 19342697 | 19343203 |
| AgamP4_2R | 19483672 | 19484180 |
| AgamP4_2R | 19511523 | 19512106 |
| AgamP4_2R | 19513674 | 19514278 |
| AgamP4_2R | 19528016 | 19528567 |
| AgamP4_2R | 19529323 | 19529847 |
| AgamP4_2R | 19607173 | 19607734 |
| AgamP4_2R | 19613793 | 19614302 |
| AgamP4_2R | 19735015 | 19735525 |
| AgamP4_2R | 19746603 | 19747199 |
| AgamP4_2R | 19761889 | 19762460 |
| AgamP4_2R | 19877567 | 19878101 |
| AgamP4_2R | 19901657 | 19902301 |
| AgamP4_2R | 19961126 | 19961636 |
| AgamP4_2R | 20087986 | 20088638 |
| AgamP4_2R | 20088491 | 20089143 |
| AgamP4_2R | 20113797 | 20114297 |
| AgamP4_2R | 20192243 | 20192813 |
| AgamP4_2R | 20230112 | 20230859 |
| AgamP4_2R | 20294351 | 20294881 |
| AgamP4_2R | 20460307 | 20460834 |
| AgamP4_2R | 20819668 | 20820199 |
| AgamP4_2R | 20829589 | 20830170 |
| AgamP4_2R | 20834468 | 20835031 |
| AgamP4_2R | 20911065 | 20911589 |
| AgamP4_2R | 20974847 | 20975407 |
| AgamP4_2R | 21112928 | 21113465 |
| AgamP4_2R | 21217355 | 21217978 |
| AgamP4_2R | 21351697 | 21352291 |
| AgamP4_2R | 21354287 | 21354839 |
| AgamP4_2R | 21358765 | 21359316 |
| AgamP4_2R | 21426438 | 21427083 |
| AgamP4_2R | 21604358 | 21604874 |
| AgamP4_2R | 21607386 | 21608002 |
| AgamP4_2R | 21750256 | 21750819 |
| AgamP4_2R | 21824075 | 21824628 |
| AgamP4_2R | 21875844 | 21876359 |
| AgamP4_2R | 21986030 | 21986675 |
| AgamP4_2R | 21994335 | 21994911 |
| AgamP4_2R | 22054095 | 22054639 |
| AgamP4_2R | 22065030 | 22065794 |
| AgamP4_2R | 22193483 | 22194042 |
| AgamP4_2R | 22223312 | 22223853 |

|           |          |          |
|-----------|----------|----------|
| AgamP4_2R | 22582926 | 22583573 |
| AgamP4_2R | 22599152 | 22599687 |
| AgamP4_2R | 22857992 | 22858586 |
| AgamP4_2R | 22917057 | 22917690 |
| AgamP4_2R | 23011459 | 23011958 |
| AgamP4_2R | 23104332 | 23104861 |
| AgamP4_2R | 23118546 | 23119075 |
| AgamP4_2R | 23140442 | 23140947 |
| AgamP4_2R | 23328232 | 23328785 |
| AgamP4_2R | 23356477 | 23356994 |
| AgamP4_2R | 23393586 | 23394162 |
| AgamP4_2R | 23419707 | 23420276 |
| AgamP4_2R | 23477397 | 23478052 |
| AgamP4_2R | 23501710 | 23502258 |
| AgamP4_2R | 23525244 | 23525870 |
| AgamP4_2R | 23568092 | 23568666 |
| AgamP4_2R | 23589115 | 23589626 |
| AgamP4_2R | 23596224 | 23596735 |
| AgamP4_2R | 23626887 | 23627448 |
| AgamP4_2R | 23663542 | 23664090 |
| AgamP4_2R | 23681564 | 23682143 |
| AgamP4_2R | 23863884 | 23864482 |
| AgamP4_2R | 24045245 | 24045747 |
| AgamP4_2R | 24116547 | 24117060 |
| AgamP4_2R | 24178332 | 24178852 |
| AgamP4_2R | 24178835 | 24179353 |
| AgamP4_2R | 24179335 | 24179853 |
| AgamP4_2R | 24181483 | 24181982 |
| AgamP4_2R | 24181983 | 24182485 |
| AgamP4_2R | 24207163 | 24207707 |
| AgamP4_2R | 24207667 | 24208207 |
| AgamP4_2R | 24208167 | 24208717 |
| AgamP4_2R | 24212873 | 24213418 |
| AgamP4_2R | 24217233 | 24217746 |
| AgamP4_2R | 24229868 | 24230523 |
| AgamP4_2R | 24326957 | 24327581 |
| AgamP4_2R | 24336702 | 24337223 |
| AgamP4_2R | 24348955 | 24349512 |
| AgamP4_2R | 24357386 | 24358108 |
| AgamP4_2R | 24374228 | 24374932 |
| AgamP4_2R | 24384341 | 24384938 |
| AgamP4_2R | 24410074 | 24410676 |
| AgamP4_2R | 24428020 | 24428546 |
| AgamP4_2R | 24465993 | 24466495 |
| AgamP4_2R | 24487942 | 24488453 |
| AgamP4_2R | 24512875 | 24513492 |
| AgamP4_2R | 24557558 | 24558227 |
| AgamP4_2R | 24607409 | 24607926 |
| AgamP4_2R | 24662083 | 24662655 |
| AgamP4_2R | 24769476 | 24770024 |

|           |          |          |
|-----------|----------|----------|
| AgamP4_2R | 24771135 | 24771639 |
| AgamP4_2R | 24774540 | 24775139 |
| AgamP4_2R | 24777973 | 24778515 |
| AgamP4_2R | 24847262 | 24847810 |
| AgamP4_2R | 24957595 | 24958142 |
| AgamP4_2R | 24980437 | 24981058 |
| AgamP4_2R | 25058807 | 25059356 |
| AgamP4_2R | 25115659 | 25116167 |
| AgamP4_2R | 25242531 | 25243066 |
| AgamP4_2R | 25365454 | 25365960 |
| AgamP4_2R | 25434728 | 25435358 |
| AgamP4_2R | 25512690 | 25513409 |
| AgamP4_2R | 25525959 | 25526548 |
| AgamP4_2R | 25536953 | 25537455 |
| AgamP4_2R | 25581489 | 25582015 |
| AgamP4_2R | 25585166 | 25585694 |
| AgamP4_2R | 25653038 | 25653574 |
| AgamP4_2R | 25698414 | 25698931 |
| AgamP4_2R | 25703593 | 25704152 |
| AgamP4_2R | 25707272 | 25707842 |
| AgamP4_2R | 25707782 | 25708347 |
| AgamP4_2R | 25708363 | 25708887 |
| AgamP4_2R | 25843367 | 25843888 |
| AgamP4_2R | 26032741 | 26033366 |
| AgamP4_2R | 26039559 | 26040063 |
| AgamP4_2R | 26091388 | 26091947 |
| AgamP4_2R | 26138172 | 26138732 |
| AgamP4_2R | 26158634 | 26159166 |
| AgamP4_2R | 26175390 | 26175897 |
| AgamP4_2R | 26276080 | 26276589 |
| AgamP4_2R | 26311054 | 26311567 |
| AgamP4_2R | 26312358 | 26312860 |
| AgamP4_2R | 26357980 | 26358489 |
| AgamP4_2R | 26377685 | 26378340 |
| AgamP4_2R | 26742784 | 26743484 |
| AgamP4_2R | 26805705 | 26806340 |
| AgamP4_2R | 26934171 | 26934742 |
| AgamP4_2R | 27042748 | 27043355 |
| AgamP4_2R | 27054916 | 27055449 |
| AgamP4_2R | 27183698 | 27184232 |
| AgamP4_2R | 27209765 | 27210382 |
| AgamP4_2R | 27282504 | 27283132 |
| AgamP4_2R | 27374991 | 27375508 |
| AgamP4_2R | 27496154 | 27496703 |
| AgamP4_2R | 27497899 | 27498418 |
| AgamP4_2R | 27652756 | 27653473 |
| AgamP4_2R | 27666393 | 27666906 |
| AgamP4_2R | 27690320 | 27690841 |
| AgamP4_2R | 27693295 | 27693824 |
| AgamP4_2R | 27723111 | 27723619 |

|           |          |          |
|-----------|----------|----------|
| AgamP4_2R | 27734543 | 27735080 |
| AgamP4_2R | 27735060 | 27735581 |
| AgamP4_2R | 27854126 | 27854868 |
| AgamP4_2R | 27889012 | 27889552 |
| AgamP4_2R | 27918841 | 27919353 |
| AgamP4_2R | 27935229 | 27935749 |
| AgamP4_2R | 27996657 | 27997160 |
| AgamP4_2R | 28099200 | 28099722 |
| AgamP4_2R | 28145370 | 28145869 |
| AgamP4_2R | 28173545 | 28174066 |
| AgamP4_2R | 28186250 | 28186821 |
| AgamP4_2R | 28253037 | 28253655 |
| AgamP4_2R | 28262803 | 28263304 |
| AgamP4_2R | 28325084 | 28325594 |
| AgamP4_2R | 28332151 | 28332811 |
| AgamP4_2R | 28348325 | 28348896 |
| AgamP4_2R | 28397900 | 28398399 |
| AgamP4_2R | 28438859 | 28439462 |
| AgamP4_2R | 28500839 | 28501367 |
| AgamP4_2R | 28559135 | 28559663 |
| AgamP4_2R | 28586961 | 28587563 |
| AgamP4_2R | 28657775 | 28658294 |
| AgamP4_2R | 28658279 | 28659280 |
| AgamP4_2R | 28674149 | 28674718 |
| AgamP4_2R | 28704357 | 28704869 |
| AgamP4_2R | 28848372 | 28848966 |
| AgamP4_2R | 28895999 | 28896500 |
| AgamP4_2R | 28907547 | 28908196 |
| AgamP4_2R | 29032660 | 29033341 |
| AgamP4_2R | 29034931 | 29035628 |
| AgamP4_2R | 29064186 | 29064743 |
| AgamP4_2R | 29374361 | 29374918 |
| AgamP4_2R | 29386468 | 29387106 |
| AgamP4_2R | 29408864 | 29409394 |
| AgamP4_2R | 29416981 | 29417483 |
| AgamP4_2R | 29419176 | 29419763 |
| AgamP4_2R | 29428548 | 29429110 |
| AgamP4_2R | 29437903 | 29438404 |
| AgamP4_2R | 29526047 | 29526710 |
| AgamP4_2R | 29668566 | 29669200 |
| AgamP4_2R | 29669113 | 29669716 |
| AgamP4_2R | 29683517 | 29684063 |
| AgamP4_2R | 29777355 | 29778059 |
| AgamP4_2R | 29780328 | 29780908 |
| AgamP4_2R | 29810713 | 29811379 |
| AgamP4_2R | 29815534 | 29816079 |
| AgamP4_2R | 29816825 | 29817361 |
| AgamP4_2R | 29948234 | 29948759 |
| AgamP4_2R | 29971282 | 29971803 |
| AgamP4_2R | 30026851 | 30027379 |

|           |          |          |
|-----------|----------|----------|
| AgamP4_2R | 30077916 | 30078463 |
| AgamP4_2R | 30125329 | 30125853 |
| AgamP4_2R | 30201542 | 30202041 |
| AgamP4_2R | 30208583 | 30209139 |
| AgamP4_2R | 30241459 | 30241977 |
| AgamP4_2R | 30293179 | 30293722 |
| AgamP4_2R | 30322402 | 30322911 |
| AgamP4_2R | 30344043 | 30344756 |
| AgamP4_2R | 30344811 | 30345346 |
| AgamP4_2R | 30351544 | 30352049 |
| AgamP4_2R | 30373063 | 30373707 |
| AgamP4_2R | 30391743 | 30392383 |
| AgamP4_2R | 30418239 | 30418854 |
| AgamP4_2R | 30466849 | 30467504 |
| AgamP4_2R | 30730919 | 30731504 |
| AgamP4_2R | 30731939 | 30732481 |
| AgamP4_2R | 30737869 | 30738420 |
| AgamP4_2R | 30902792 | 30903375 |
| AgamP4_2R | 31146104 | 31146769 |
| AgamP4_2R | 31165003 | 31165504 |
| AgamP4_2R | 31196041 | 31196554 |
| AgamP4_2R | 31211891 | 31212419 |
| AgamP4_2R | 31247785 | 31248341 |
| AgamP4_2R | 31277781 | 31278311 |
| AgamP4_2R | 31285514 | 31286083 |
| AgamP4_2R | 31332415 | 31333009 |
| AgamP4_2R | 31411815 | 31412323 |
| AgamP4_2R | 31413672 | 31414240 |
| AgamP4_2R | 31643728 | 31644395 |
| AgamP4_2R | 31647851 | 31648351 |
| AgamP4_2R | 31755955 | 31756505 |
| AgamP4_2R | 31992799 | 31993387 |
| AgamP4_2R | 32039570 | 32040088 |
| AgamP4_2R | 32085231 | 32085747 |
| AgamP4_2R | 32227681 | 32228205 |
| AgamP4_2R | 32361996 | 32362503 |
| AgamP4_2R | 32404139 | 32404672 |
| AgamP4_2R | 32821177 | 32821733 |
| AgamP4_2R | 32833927 | 32834468 |
| AgamP4_2R | 32892432 | 32892932 |
| AgamP4_2R | 32978775 | 32979281 |
| AgamP4_2R | 32997283 | 32997812 |
| AgamP4_2R | 33055533 | 33056048 |
| AgamP4_2R | 33160611 | 33161133 |
| AgamP4_2R | 33185271 | 33185784 |
| AgamP4_2R | 33215940 | 33216677 |
| AgamP4_2R | 33219766 | 33220419 |
| AgamP4_2R | 33257990 | 33258504 |
| AgamP4_2R | 33330439 | 33330977 |
| AgamP4_2R | 33375720 | 33376222 |

|           |          |          |
|-----------|----------|----------|
| AgamP4_2R | 33419146 | 33420159 |
| AgamP4_2R | 33450420 | 33450926 |
| AgamP4_2R | 33507144 | 33507691 |
| AgamP4_2R | 33594962 | 33595494 |
| AgamP4_2R | 33612304 | 33612939 |
| AgamP4_2R | 33632816 | 33633378 |
| AgamP4_2R | 33636616 | 33637152 |
| AgamP4_2R | 33836959 | 33837465 |
| AgamP4_2R | 34022654 | 34023206 |
| AgamP4_2R | 34023154 | 34023739 |
| AgamP4_2R | 34296711 | 34297279 |
| AgamP4_2R | 34297871 | 34298404 |
| AgamP4_2R | 34608837 | 34609359 |
| AgamP4_2R | 34609359 | 34609914 |
| AgamP4_2R | 34949748 | 34950440 |
| AgamP4_2R | 35008682 | 35009256 |
| AgamP4_2R | 35101340 | 35101869 |
| AgamP4_2R | 35211631 | 35212233 |
| AgamP4_2R | 35243066 | 35243565 |
| AgamP4_2R | 35307651 | 35308281 |
| AgamP4_2R | 35331655 | 35332234 |
| AgamP4_2R | 35343002 | 35343522 |
| AgamP4_2R | 35354110 | 35354696 |
| AgamP4_2R | 35362795 | 35363306 |
| AgamP4_2R | 35409720 | 35410344 |
| AgamP4_2R | 35440145 | 35440676 |
| AgamP4_2R | 35474688 | 35475196 |
| AgamP4_2R | 35570028 | 35570595 |
| AgamP4_2R | 35627444 | 35627988 |
| AgamP4_2R | 35679471 | 35679970 |
| AgamP4_2R | 35685335 | 35685846 |
| AgamP4_2R | 35691726 | 35692464 |
| AgamP4_2R | 35692229 | 35692968 |
| AgamP4_2R | 35773186 | 35773687 |
| AgamP4_2R | 35791523 | 35792066 |
| AgamP4_2R | 35913105 | 35913615 |
| AgamP4_2R | 35915783 | 35916532 |
| AgamP4_2R | 35961974 | 35962495 |
| AgamP4_2R | 35983917 | 35984425 |
| AgamP4_2R | 35993829 | 35994389 |
| AgamP4_2R | 36049782 | 36050345 |
| AgamP4_2R | 36083977 | 36084583 |
| AgamP4_2R | 36112610 | 36113217 |
| AgamP4_2R | 36134105 | 36134660 |
| AgamP4_2R | 36273623 | 36274127 |
| AgamP4_2R | 36329883 | 36330514 |
| AgamP4_2R | 36342724 | 36343266 |
| AgamP4_2R | 36385254 | 36385765 |
| AgamP4_2R | 36464385 | 36465143 |
| AgamP4_2R | 36467962 | 36468571 |

|           |          |          |
|-----------|----------|----------|
| AgamP4_2R | 36816007 | 36816518 |
| AgamP4_2R | 36891326 | 36891874 |
| AgamP4_2R | 36920213 | 36920771 |
| AgamP4_2R | 36921249 | 36921820 |
| AgamP4_2R | 36948196 | 36948834 |
| AgamP4_2R | 36983630 | 36984192 |
| AgamP4_2R | 36987428 | 36988056 |
| AgamP4_2R | 36991842 | 36992430 |
| AgamP4_2R | 37081306 | 37081851 |
| AgamP4_2R | 37083143 | 37083649 |
| AgamP4_2R | 37122300 | 37122895 |
| AgamP4_2R | 37158690 | 37159255 |
| AgamP4_2R | 37292620 | 37293157 |
| AgamP4_2R | 37372625 | 37373127 |
| AgamP4_2R | 37384088 | 37384651 |
| AgamP4_2R | 37643916 | 37644447 |
| AgamP4_2R | 37657466 | 37658184 |
| AgamP4_2R | 37681394 | 37681910 |
| AgamP4_2R | 37703763 | 37704265 |
| AgamP4_2R | 37736060 | 37736630 |
| AgamP4_2R | 37911860 | 37912408 |
| AgamP4_2R | 37965092 | 37965722 |
| AgamP4_2R | 38042423 | 38042961 |
| AgamP4_2R | 38332595 | 38333135 |
| AgamP4_2R | 38390962 | 38391494 |
| AgamP4_2R | 38396712 | 38397231 |
| AgamP4_2R | 38402037 | 38402557 |
| AgamP4_2R | 38402550 | 38403070 |
| AgamP4_2R | 38474644 | 38475220 |
| AgamP4_2R | 38560819 | 38561404 |
| AgamP4_2R | 38616634 | 38617444 |
| AgamP4_2R | 38623046 | 38623665 |
| AgamP4_2R | 38684048 | 38684568 |
| AgamP4_2R | 38685389 | 38686002 |
| AgamP4_2R | 38709931 | 38710467 |
| AgamP4_2R | 38828903 | 38829452 |
| AgamP4_2R | 38874224 | 38874824 |
| AgamP4_2R | 38892465 | 38892996 |
| AgamP4_2R | 38929141 | 38929668 |
| AgamP4_2R | 39001291 | 39001842 |
| AgamP4_2R | 39018539 | 39019118 |
| AgamP4_2R | 39035586 | 39036103 |
| AgamP4_2R | 39036094 | 39036609 |
| AgamP4_2R | 39120536 | 39121123 |
| AgamP4_2R | 39248727 | 39249729 |
| AgamP4_2R | 39252701 | 39253258 |
| AgamP4_2R | 39261616 | 39262188 |
| AgamP4_2R | 39266467 | 39267178 |
| AgamP4_2R | 39268648 | 39269221 |
| AgamP4_2R | 39313126 | 39313655 |

|           |          |          |
|-----------|----------|----------|
| AgamP4_2R | 39313892 | 39314426 |
| AgamP4_2R | 39328986 | 39329522 |
| AgamP4_2R | 39373676 | 39374192 |
| AgamP4_2R | 39428237 | 39428742 |
| AgamP4_2R | 39431227 | 39431753 |
| AgamP4_2R | 39431728 | 39432255 |
| AgamP4_2R | 39490182 | 39490713 |
| AgamP4_2R | 39615317 | 39615980 |
| AgamP4_2R | 39727776 | 39728294 |
| AgamP4_2R | 39922830 | 39923332 |
| AgamP4_2R | 39927974 | 39928533 |
| AgamP4_2R | 39944226 | 39944782 |
| AgamP4_2R | 39972781 | 39973298 |
| AgamP4_2R | 39990379 | 39990929 |
| AgamP4_2R | 40005972 | 40006630 |
| AgamP4_2R | 40065510 | 40066028 |
| AgamP4_2R | 40075385 | 40075887 |
| AgamP4_2R | 40088369 | 40088901 |
| AgamP4_2R | 40196339 | 40196839 |
| AgamP4_2R | 40214407 | 40214971 |
| AgamP4_2R | 40263218 | 40263886 |
| AgamP4_2R | 40457026 | 40457555 |
| AgamP4_2R | 40550002 | 40550516 |
| AgamP4_2R | 40595563 | 40596062 |
| AgamP4_2R | 40598414 | 40598938 |
| AgamP4_2R | 40624669 | 40625181 |
| AgamP4_2R | 40639474 | 40639978 |
| AgamP4_2R | 40698929 | 40699471 |
| AgamP4_2R | 40943732 | 40944267 |
| AgamP4_2R | 40952392 | 40952948 |
| AgamP4_2R | 40989641 | 40990309 |
| AgamP4_2R | 41074275 | 41074844 |
| AgamP4_2R | 41211371 | 41211871 |
| AgamP4_2R | 41361606 | 41362145 |
| AgamP4_2R | 41408243 | 41408779 |
| AgamP4_2R | 41478197 | 41478793 |
| AgamP4_2R | 41543198 | 41543711 |
| AgamP4_2R | 41685605 | 41686110 |
| AgamP4_2R | 41718264 | 41718782 |
| AgamP4_2R | 41785502 | 41786037 |
| AgamP4_2R | 41786920 | 41787429 |
| AgamP4_2R | 41974448 | 41975085 |
| AgamP4_2R | 42030690 | 42031204 |
| AgamP4_2R | 42172530 | 42173230 |
| AgamP4_2R | 42210236 | 42210746 |
| AgamP4_2R | 42307434 | 42308050 |
| AgamP4_2R | 42408325 | 42408875 |
| AgamP4_2R | 42481764 | 42482278 |
| AgamP4_2R | 42543606 | 42544127 |
| AgamP4_2R | 42556091 | 42556620 |

|           |          |          |
|-----------|----------|----------|
| AgamP4_2R | 42665230 | 42665738 |
| AgamP4_2R | 42689284 | 42689834 |
| AgamP4_2R | 42750335 | 42750841 |
| AgamP4_2R | 43132955 | 43133477 |
| AgamP4_2R | 43270106 | 43270649 |
| AgamP4_2R | 43469079 | 43469683 |
| AgamP4_2R | 43626624 | 43627230 |
| AgamP4_2R | 43843141 | 43843712 |
| AgamP4_2R | 43883985 | 43884488 |
| AgamP4_2R | 43893443 | 43894017 |
| AgamP4_2R | 43912089 | 43912640 |
| AgamP4_2R | 43938422 | 43938922 |
| AgamP4_2R | 44202588 | 44203189 |
| AgamP4_2R | 44203170 | 44203716 |
| AgamP4_2R | 44249378 | 44249881 |
| AgamP4_2R | 44284796 | 44285312 |
| AgamP4_2R | 44313704 | 44314212 |
| AgamP4_2R | 44375541 | 44376188 |
| AgamP4_2R | 44391674 | 44392267 |
| AgamP4_2R | 44394169 | 44394690 |
| AgamP4_2R | 44506647 | 44507191 |
| AgamP4_2R | 44652212 | 44652762 |
| AgamP4_2R | 44678240 | 44678754 |
| AgamP4_2R | 44835633 | 44836173 |
| AgamP4_2R | 44847639 | 44848157 |
| AgamP4_2R | 45129866 | 45130386 |
| AgamP4_2R | 45617014 | 45617514 |
| AgamP4_2R | 45618749 | 45619258 |
| AgamP4_2R | 45671074 | 45671775 |
| AgamP4_2R | 45677028 | 45677701 |
| AgamP4_2R | 45692923 | 45693440 |
| AgamP4_2R | 45700587 | 45701110 |
| AgamP4_2R | 45749404 | 45749945 |
| AgamP4_2R | 45776413 | 45776916 |
| AgamP4_2R | 46159666 | 46160177 |
| AgamP4_2R | 46166391 | 46166894 |
| AgamP4_2R | 46278593 | 46279099 |
| AgamP4_2R | 46291138 | 46291753 |
| AgamP4_2R | 46407202 | 46407710 |
| AgamP4_2R | 46460232 | 46460731 |
| AgamP4_2R | 46461022 | 46461556 |
| AgamP4_2R | 46469010 | 46469516 |
| AgamP4_2R | 46573589 | 46574146 |
| AgamP4_2R | 46574330 | 46574844 |
| AgamP4_2R | 46586893 | 46587512 |
| AgamP4_2R | 46588218 | 46588781 |
| AgamP4_2R | 46619572 | 46620133 |
| AgamP4_2R | 46778167 | 46778729 |
| AgamP4_2R | 46901332 | 46901865 |
| AgamP4_2R | 46905414 | 46905945 |

|           |          |          |
|-----------|----------|----------|
| AgamP4_2R | 47042519 | 47043058 |
| AgamP4_2R | 47433573 | 47434075 |
| AgamP4_2R | 47464090 | 47464617 |
| AgamP4_2R | 47550127 | 47550665 |
| AgamP4_2R | 47559568 | 47560075 |
| AgamP4_2R | 47596816 | 47597330 |
| AgamP4_2R | 47643005 | 47643548 |
| AgamP4_2R | 47652492 | 47653212 |
| AgamP4_2R | 47791758 | 47792281 |
| AgamP4_2R | 48082999 | 48083603 |
| AgamP4_2R | 48175906 | 48176451 |
| AgamP4_2R | 48329472 | 48330176 |
| AgamP4_2R | 48331305 | 48331821 |
| AgamP4_2R | 48371131 | 48371675 |
| AgamP4_2R | 48431523 | 48432046 |
| AgamP4_2R | 48501304 | 48501818 |
| AgamP4_2R | 48565163 | 48565906 |
| AgamP4_2R | 48583148 | 48583650 |
| AgamP4_2R | 48596471 | 48597056 |
| AgamP4_2R | 48611495 | 48612023 |
| AgamP4_2R | 48634389 | 48634965 |
| AgamP4_2R | 48698868 | 48699555 |
| AgamP4_2R | 48910894 | 48911432 |
| AgamP4_2R | 48979539 | 48980064 |
| AgamP4_2R | 49107067 | 49107665 |
| AgamP4_2R | 49135927 | 49136430 |
| AgamP4_2R | 49171737 | 49172359 |
| AgamP4_2R | 49174101 | 49174684 |
| AgamP4_2R | 49186993 | 49187542 |
| AgamP4_2R | 49235812 | 49236321 |
| AgamP4_2R | 49243156 | 49243711 |
| AgamP4_2R | 49318343 | 49318976 |
| AgamP4_2R | 49347096 | 49347611 |
| AgamP4_2R | 49347613 | 49348116 |
| AgamP4_2R | 49486034 | 49486584 |
| AgamP4_2R | 49536753 | 49537255 |
| AgamP4_2R | 49632565 | 49633115 |
| AgamP4_2R | 49685752 | 49686374 |
| AgamP4_2R | 49868454 | 49869018 |
| AgamP4_2R | 49871195 | 49871694 |
| AgamP4_2R | 49932919 | 49933473 |
| AgamP4_2R | 50089037 | 50089543 |
| AgamP4_2R | 50099283 | 50099868 |
| AgamP4_2R | 50169567 | 50170081 |
| AgamP4_2R | 50279277 | 50279797 |
| AgamP4_2R | 50334352 | 50334865 |
| AgamP4_2R | 50367681 | 50368187 |
| AgamP4_2R | 50456858 | 50457431 |
| AgamP4_2R | 50462562 | 50463070 |
| AgamP4_2R | 50719716 | 50720242 |

|           |          |          |
|-----------|----------|----------|
| AgamP4_2R | 50730006 | 50730542 |
| AgamP4_2R | 50737458 | 50737978 |
| AgamP4_2R | 50869003 | 50869531 |
| AgamP4_2R | 51120225 | 51120751 |
| AgamP4_2R | 51155648 | 51156231 |
| AgamP4_2R | 51526592 | 51527319 |
| AgamP4_2R | 51537556 | 51538077 |
| AgamP4_2R | 51567527 | 51568249 |
| AgamP4_2R | 51590693 | 51591198 |
| AgamP4_2R | 51837236 | 51837775 |
| AgamP4_2R | 51861654 | 51862157 |
| AgamP4_2R | 51922980 | 51923590 |
| AgamP4_2R | 52465209 | 52465741 |
| AgamP4_2R | 52572686 | 52573194 |
| AgamP4_2R | 52611561 | 52612093 |
| AgamP4_2R | 52693032 | 52693645 |
| AgamP4_2R | 52931236 | 52931959 |
| AgamP4_2R | 52970863 | 52971475 |
| AgamP4_2R | 53082716 | 53083257 |
| AgamP4_2R | 53097120 | 53097701 |
| AgamP4_2R | 53236562 | 53237121 |
| AgamP4_2R | 53285129 | 53285755 |
| AgamP4_2R | 53411246 | 53411790 |
| AgamP4_2R | 53484252 | 53484806 |
| AgamP4_2R | 53491317 | 53491872 |
| AgamP4_2R | 53551046 | 53551719 |
| AgamP4_2R | 53555778 | 53556282 |
| AgamP4_2R | 53596786 | 53597292 |
| AgamP4_2R | 53644279 | 53644797 |
| AgamP4_2R | 53658534 | 53659228 |
| AgamP4_2R | 53696291 | 53696807 |
| AgamP4_2R | 53917630 | 53918154 |
| AgamP4_2R | 53972474 | 53972995 |
| AgamP4_2R | 54127745 | 54128340 |
| AgamP4_2R | 54237287 | 54237867 |
| AgamP4_2R | 54344448 | 54344968 |
| AgamP4_2R | 54446485 | 54446990 |
| AgamP4_2R | 54643741 | 54644242 |
| AgamP4_2R | 54691329 | 54691855 |
| AgamP4_2R | 54705286 | 54705844 |
| AgamP4_2R | 54708625 | 54709137 |
| AgamP4_2R | 54712180 | 54712736 |
| AgamP4_2R | 54741454 | 54741998 |
| AgamP4_2R | 54779815 | 54780314 |
| AgamP4_2R | 54802437 | 54802983 |
| AgamP4_2R | 54807974 | 54808538 |
| AgamP4_2R | 54878463 | 54878985 |
| AgamP4_2R | 54878966 | 54879535 |
| AgamP4_2R | 54898191 | 54898939 |
| AgamP4_2R | 54969824 | 54970362 |

|           |          |          |
|-----------|----------|----------|
| AgamP4_2R | 54977185 | 54977830 |
| AgamP4_2R | 55030017 | 55030526 |
| AgamP4_2R | 55053802 | 55054304 |
| AgamP4_2R | 55332925 | 55333437 |
| AgamP4_2R | 55336206 | 55336707 |
| AgamP4_2R | 55336707 | 55337209 |
| AgamP4_2R | 55350126 | 55350774 |
| AgamP4_2R | 55389484 | 55390029 |
| AgamP4_2R | 55448425 | 55449219 |
| AgamP4_2R | 55520309 | 55520812 |
| AgamP4_2R | 55844821 | 55845446 |
| AgamP4_2R | 55851988 | 55852506 |
| AgamP4_2R | 56000268 | 56000820 |
| AgamP4_2R | 56151100 | 56151653 |
| AgamP4_2R | 56176265 | 56176822 |
| AgamP4_2R | 56287070 | 56287600 |
| AgamP4_2R | 56345524 | 56346121 |
| AgamP4_2R | 56394907 | 56395461 |
| AgamP4_2R | 56492963 | 56493469 |
| AgamP4_2R | 56605495 | 56606118 |
| AgamP4_2R | 56681696 | 56682205 |
| AgamP4_2R | 56698906 | 56699413 |
| AgamP4_2R | 56735888 | 56736390 |
| AgamP4_2R | 56812810 | 56813382 |
| AgamP4_2R | 56890947 | 56891517 |
| AgamP4_2R | 56893876 | 56894397 |
| AgamP4_2R | 56938353 | 56938862 |
| AgamP4_2R | 56989875 | 56990616 |
| AgamP4_2R | 56999768 | 57000471 |
| AgamP4_2R | 57354788 | 57355345 |
| AgamP4_2R | 57851165 | 57851685 |
| AgamP4_2R | 58194553 | 58195247 |
| AgamP4_2R | 58470653 | 58471232 |
| AgamP4_2R | 58477156 | 58477677 |
| AgamP4_2R | 59132822 | 59133326 |
| AgamP4_2R | 59601487 | 59602036 |
| AgamP4_2R | 60215286 | 60215835 |
| AgamP4_2R | 60803828 | 60804417 |
| AgamP4_3L | 430461   | 430990   |
| AgamP4_3L | 731208   | 731718   |
| AgamP4_3L | 757876   | 758411   |
| AgamP4_3L | 2586112  | 2586619  |
| AgamP4_3L | 2713963  | 2714481  |
| AgamP4_3L | 2984919  | 2985483  |
| AgamP4_3L | 3183933  | 3184451  |
| AgamP4_3L | 3318306  | 3318808  |
| AgamP4_3L | 3388979  | 3389508  |
| AgamP4_3L | 3753776  | 3754340  |
| AgamP4_3L | 4044351  | 4044887  |
| AgamP4_3L | 4183028  | 4183530  |

|           |          |         |          |
|-----------|----------|---------|----------|
| AgamP4_3L | 4625581  | 4626086 |          |
| AgamP4_3L | 4863498  | 4864085 |          |
| AgamP4_3L | 5039318  | 5039871 |          |
| AgamP4_3L | 5079655  | 5080165 |          |
| AgamP4_3L | 5255066  | 5255702 |          |
| AgamP4_3L | 5261329  | 5261843 |          |
| AgamP4_3L | 5314314  | 5314887 |          |
| AgamP4_3L | 5586131  | 5586701 |          |
| AgamP4_3L | 5998247  | 5998774 |          |
| AgamP4_3L | 6006533  | 6007188 |          |
| AgamP4_3L | 6016076  | 6016656 |          |
| AgamP4_3L | 6165354  | 6165859 |          |
| AgamP4_3L | 6362458  | 6362988 |          |
| AgamP4_3L | 6550039  | 6550542 |          |
| AgamP4_3L | 6755085  | 6755673 |          |
| AgamP4_3L | 6891060  | 6891651 |          |
| AgamP4_3L | 6947850  | 6948608 |          |
| AgamP4_3L | 6957439  | 6957955 |          |
| AgamP4_3L | 7634384  | 7635004 |          |
| AgamP4_3L | 7838682  | 7839295 |          |
| AgamP4_3L | 7868500  | 7869016 |          |
| AgamP4_3L | 7882503  | 7883026 |          |
| AgamP4_3L | 8045940  | 8046456 |          |
| AgamP4_3L | 8203916  | 8204429 |          |
| AgamP4_3L | 8204435  | 8204942 |          |
| AgamP4_3L | 8554349  | 8554939 |          |
| AgamP4_3L | 8577156  | 8577682 |          |
| AgamP4_3L | 9012318  | 9012934 |          |
| AgamP4_3L | 9151529  | 9152206 |          |
| AgamP4_3L | 9261300  | 9261863 |          |
| AgamP4_3L | 9308178  | 9308732 |          |
| AgamP4_3L | 9450372  | 9450879 |          |
| AgamP4_3L | 9574849  | 9575348 |          |
| AgamP4_3L | 9887657  | 9888211 |          |
| AgamP4_3L | 10017019 |         | 10017522 |
| AgamP4_3L | 10030570 |         | 10031112 |
| AgamP4_3L | 10048734 |         | 10049301 |
| AgamP4_3L | 10082636 |         | 10083141 |
| AgamP4_3L | 10244843 |         | 10245438 |
| AgamP4_3L | 10265566 |         | 10266107 |
| AgamP4_3L | 10353955 |         | 10354464 |
| AgamP4_3L | 10373489 |         | 10374024 |
| AgamP4_3L | 10579794 |         | 10580396 |
| AgamP4_3L | 10615571 |         | 10616077 |
| AgamP4_3L | 10808489 |         | 10809041 |
| AgamP4_3L | 10883211 |         | 10883764 |
| AgamP4_3L | 10946582 |         | 10947149 |
| AgamP4_3L | 11009909 |         | 11010470 |
| AgamP4_3L | 11128068 |         | 11128603 |
| AgamP4_3L | 11359109 |         | 11359613 |

|           |          |          |
|-----------|----------|----------|
| AgamP4_3L | 11361670 | 11362190 |
| AgamP4_3L | 11366371 | 11366886 |
| AgamP4_3L | 11705111 | 11705630 |
| AgamP4_3L | 11851528 | 11852067 |
| AgamP4_3L | 11855554 | 11856184 |
| AgamP4_3L | 11856077 | 11856705 |
| AgamP4_3L | 11880093 | 11880632 |
| AgamP4_3L | 12014894 | 12015412 |
| AgamP4_3L | 12024313 | 12024829 |
| AgamP4_3L | 12304914 | 12305428 |
| AgamP4_3L | 12306633 | 12307198 |
| AgamP4_3L | 12315406 | 12315977 |
| AgamP4_3L | 12343666 | 12344190 |
| AgamP4_3L | 12414282 | 12414820 |
| AgamP4_3L | 12699163 | 12699686 |
| AgamP4_3L | 12701677 | 12702219 |
| AgamP4_3L | 12719744 | 12720281 |
| AgamP4_3L | 12758258 | 12758820 |
| AgamP4_3L | 12871990 | 12872554 |
| AgamP4_3L | 12873518 | 12874105 |
| AgamP4_3L | 13258041 | 13258553 |
| AgamP4_3L | 13290848 | 13291398 |
| AgamP4_3L | 13310780 | 13311302 |
| AgamP4_3L | 13312042 | 13312617 |
| AgamP4_3L | 13364646 | 13365208 |
| AgamP4_3L | 13396770 | 13397398 |
| AgamP4_3L | 13435656 | 13436266 |
| AgamP4_3L | 13440134 | 13440717 |
| AgamP4_3L | 13476142 | 13476657 |
| AgamP4_3L | 13632163 | 13632716 |
| AgamP4_3L | 13635466 | 13635970 |
| AgamP4_3L | 13644807 | 13645373 |
| AgamP4_3L | 13660969 | 13661700 |
| AgamP4_3L | 13669329 | 13669863 |
| AgamP4_3L | 13728392 | 13728922 |
| AgamP4_3L | 13795976 | 13796619 |
| AgamP4_3L | 13812723 | 13813252 |
| AgamP4_3L | 13962528 | 13963028 |
| AgamP4_3L | 13995323 | 13995832 |
| AgamP4_3L | 14126584 | 14127285 |
| AgamP4_3L | 14170540 | 14171105 |
| AgamP4_3L | 14356648 | 14357264 |
| AgamP4_3L | 14456571 | 14457072 |
| AgamP4_3L | 14581324 | 14581929 |
| AgamP4_3L | 14634202 | 14634753 |
| AgamP4_3L | 14721700 | 14722277 |
| AgamP4_3L | 14867563 | 14868133 |
| AgamP4_3L | 15052422 | 15052965 |
| AgamP4_3L | 15073497 | 15074118 |
| AgamP4_3L | 15087262 | 15087842 |

|           |          |          |
|-----------|----------|----------|
| AgamP4_3L | 15090744 | 15091273 |
| AgamP4_3L | 15092648 | 15093310 |
| AgamP4_3L | 15129799 | 15130456 |
| AgamP4_3L | 15159216 | 15159720 |
| AgamP4_3L | 15224731 | 15225261 |
| AgamP4_3L | 15301333 | 15301970 |
| AgamP4_3L | 15327291 | 15327841 |
| AgamP4_3L | 15351770 | 15352316 |
| AgamP4_3L | 15401226 | 15401743 |
| AgamP4_3L | 15528821 | 15529447 |
| AgamP4_3L | 15642573 | 15643131 |
| AgamP4_3L | 15681917 | 15682629 |
| AgamP4_3L | 15682428 | 15683139 |
| AgamP4_3L | 15683806 | 15684317 |
| AgamP4_3L | 15700550 | 15701052 |
| AgamP4_3L | 15704240 | 15704741 |
| AgamP4_3L | 15704741 | 15705247 |
| AgamP4_3L | 15726691 | 15727231 |
| AgamP4_3L | 15737530 | 15738105 |
| AgamP4_3L | 15819912 | 15820450 |
| AgamP4_3L | 15851451 | 15852078 |
| AgamP4_3L | 15981074 | 15981578 |
| AgamP4_3L | 15983989 | 15984492 |
| AgamP4_3L | 16088915 | 16089426 |
| AgamP4_3L | 16200955 | 16201460 |
| AgamP4_3L | 16201455 | 16201964 |
| AgamP4_3L | 16317380 | 16317885 |
| AgamP4_3L | 16466841 | 16467430 |
| AgamP4_3L | 16545590 | 16546095 |
| AgamP4_3L | 16568262 | 16568794 |
| AgamP4_3L | 16577522 | 16578077 |
| AgamP4_3L | 16582485 | 16583063 |
| AgamP4_3L | 16585305 | 16585836 |
| AgamP4_3L | 16690900 | 16691449 |
| AgamP4_3L | 16838317 | 16838838 |
| AgamP4_3L | 16873704 | 16874235 |
| AgamP4_3L | 16901511 | 16902032 |
| AgamP4_3L | 17001923 | 17002455 |
| AgamP4_3L | 17035091 | 17035613 |
| AgamP4_3L | 17222872 | 17223647 |
| AgamP4_3L | 17226060 | 17226593 |
| AgamP4_3L | 17249991 | 17250527 |
| AgamP4_3L | 17271901 | 17272483 |
| AgamP4_3L | 17306035 | 17306685 |
| AgamP4_3L | 17365205 | 17365833 |
| AgamP4_3L | 17527356 | 17527955 |
| AgamP4_3L | 17819685 | 17820191 |
| AgamP4_3L | 17949711 | 17950210 |
| AgamP4_3L | 17950233 | 17950744 |
| AgamP4_3L | 17991433 | 17992046 |

|           |          |          |
|-----------|----------|----------|
| AgamP4_3L | 18009204 | 18009725 |
| AgamP4_3L | 18094462 | 18094967 |
| AgamP4_3L | 18148052 | 18148552 |
| AgamP4_3L | 18255114 | 18255638 |
| AgamP4_3L | 18358627 | 18359156 |
| AgamP4_3L | 18408392 | 18409065 |
| AgamP4_3L | 18490975 | 18491494 |
| AgamP4_3L | 18517662 | 18518239 |
| AgamP4_3L | 18657505 | 18658004 |
| AgamP4_3L | 18706376 | 18707093 |
| AgamP4_3L | 18730062 | 18730662 |
| AgamP4_3L | 18764778 | 18765353 |
| AgamP4_3L | 18912500 | 18913037 |
| AgamP4_3L | 18938316 | 18938823 |
| AgamP4_3L | 18955110 | 18955626 |
| AgamP4_3L | 19151458 | 19151978 |
| AgamP4_3L | 19185010 | 19185521 |
| AgamP4_3L | 19243333 | 19243913 |
| AgamP4_3L | 19252558 | 19253107 |
| AgamP4_3L | 19363725 | 19364348 |
| AgamP4_3L | 19472079 | 19472817 |
| AgamP4_3L | 19479294 | 19479821 |
| AgamP4_3L | 19481728 | 19482233 |
| AgamP4_3L | 19515019 | 19515525 |
| AgamP4_3L | 19517296 | 19517850 |
| AgamP4_3L | 19667969 | 19668482 |
| AgamP4_3L | 19716831 | 19717337 |
| AgamP4_3L | 19717332 | 19717841 |
| AgamP4_3L | 19724571 | 19725228 |
| AgamP4_3L | 19821933 | 19822484 |
| AgamP4_3L | 19868996 | 19869506 |
| AgamP4_3L | 20033137 | 20033670 |
| AgamP4_3L | 20142308 | 20142836 |
| AgamP4_3L | 20180725 | 20181320 |
| AgamP4_3L | 20230690 | 20231214 |
| AgamP4_3L | 20242726 | 20243265 |
| AgamP4_3L | 20316799 | 20317493 |
| AgamP4_3L | 20432050 | 20432727 |
| AgamP4_3L | 20465999 | 20466534 |
| AgamP4_3L | 20590386 | 20591041 |
| AgamP4_3L | 20769074 | 20769587 |
| AgamP4_3L | 20803906 | 20804658 |
| AgamP4_3L | 20837876 | 20838464 |
| AgamP4_3L | 20936596 | 20937138 |
| AgamP4_3L | 20945883 | 20946431 |
| AgamP4_3L | 20980984 | 20981538 |
| AgamP4_3L | 21273828 | 21274355 |
| AgamP4_3L | 21334568 | 21335105 |
| AgamP4_3L | 21412328 | 21412978 |
| AgamP4_3L | 21422477 | 21423105 |

|           |          |          |
|-----------|----------|----------|
| AgamP4_3L | 21574661 | 21575183 |
| AgamP4_3L | 21924347 | 21924860 |
| AgamP4_3L | 21994880 | 21995423 |
| AgamP4_3L | 22297020 | 22297627 |
| AgamP4_3L | 22505329 | 22505847 |
| AgamP4_3L | 22505984 | 22506484 |
| AgamP4_3L | 22532717 | 22533251 |
| AgamP4_3L | 22542158 | 22542866 |
| AgamP4_3L | 22593308 | 22593905 |
| AgamP4_3L | 22604364 | 22604880 |
| AgamP4_3L | 22680652 | 22681262 |
| AgamP4_3L | 22696862 | 22697491 |
| AgamP4_3L | 22863210 | 22863961 |
| AgamP4_3L | 22879713 | 22880345 |
| AgamP4_3L | 22945319 | 22945883 |
| AgamP4_3L | 22946693 | 22947217 |
| AgamP4_3L | 23021925 | 23022471 |
| AgamP4_3L | 23051096 | 23051632 |
| AgamP4_3L | 23196539 | 23197047 |
| AgamP4_3L | 23418376 | 23418926 |
| AgamP4_3L | 23420528 | 23421063 |
| AgamP4_3L | 24034046 | 24034581 |
| AgamP4_3L | 24089653 | 24090178 |
| AgamP4_3L | 24253468 | 24254008 |
| AgamP4_3L | 24348522 | 24349069 |
| AgamP4_3L | 24364564 | 24365066 |
| AgamP4_3L | 24389823 | 24390410 |
| AgamP4_3L | 24415772 | 24416290 |
| AgamP4_3L | 24811045 | 24811566 |
| AgamP4_3L | 24817895 | 24818568 |
| AgamP4_3L | 24830682 | 24831250 |
| AgamP4_3L | 24925372 | 24925886 |
| AgamP4_3L | 24961626 | 24962157 |
| AgamP4_3L | 24966439 | 24967013 |
| AgamP4_3L | 24968569 | 24969122 |
| AgamP4_3L | 25017575 | 25018215 |
| AgamP4_3L | 25027205 | 25027734 |
| AgamP4_3L | 25227434 | 25228078 |
| AgamP4_3L | 25266310 | 25266819 |
| AgamP4_3L | 25343062 | 25343609 |
| AgamP4_3L | 25597757 | 25598259 |
| AgamP4_3L | 25676276 | 25676934 |
| AgamP4_3L | 25676783 | 25677518 |
| AgamP4_3L | 25695911 | 25696419 |
| AgamP4_3L | 25923978 | 25924502 |
| AgamP4_3L | 25950579 | 25951114 |
| AgamP4_3L | 26018424 | 26018973 |
| AgamP4_3L | 26024894 | 26025492 |
| AgamP4_3L | 26228065 | 26228576 |
| AgamP4_3L | 26371895 | 26372507 |

|           |          |          |
|-----------|----------|----------|
| AgamP4_3L | 26461828 | 26462350 |
| AgamP4_3L | 26678300 | 26678955 |
| AgamP4_3L | 26679625 | 26680202 |
| AgamP4_3L | 26724518 | 26725074 |
| AgamP4_3L | 26829544 | 26830065 |
| AgamP4_3L | 26880434 | 26881040 |
| AgamP4_3L | 26886078 | 26886580 |
| AgamP4_3L | 26900529 | 26901062 |
| AgamP4_3L | 26966260 | 26966877 |
| AgamP4_3L | 27018747 | 27019411 |
| AgamP4_3L | 27068957 | 27069509 |
| AgamP4_3L | 27135575 | 27136182 |
| AgamP4_3L | 27287647 | 27288175 |
| AgamP4_3L | 27334655 | 27335257 |
| AgamP4_3L | 27392918 | 27393486 |
| AgamP4_3L | 27494426 | 27494973 |
| AgamP4_3L | 27572281 | 27572788 |
| AgamP4_3L | 27793022 | 27793533 |
| AgamP4_3L | 27881806 | 27882470 |
| AgamP4_3L | 27911234 | 27911841 |
| AgamP4_3L | 27966508 | 27967067 |
| AgamP4_3L | 27972673 | 27973286 |
| AgamP4_3L | 27990422 | 27990932 |
| AgamP4_3L | 28025379 | 28025898 |
| AgamP4_3L | 28074163 | 28074684 |
| AgamP4_3L | 28114315 | 28114956 |
| AgamP4_3L | 28125340 | 28125854 |
| AgamP4_3L | 28397315 | 28397837 |
| AgamP4_3L | 28433937 | 28434456 |
| AgamP4_3L | 28507499 | 28508054 |
| AgamP4_3L | 28516462 | 28517034 |
| AgamP4_3L | 28597562 | 28598219 |
| AgamP4_3L | 28657600 | 28658241 |
| AgamP4_3L | 28666679 | 28667252 |
| AgamP4_3L | 28801981 | 28802537 |
| AgamP4_3L | 28808020 | 28808588 |
| AgamP4_3L | 28817105 | 28817653 |
| AgamP4_3L | 28883097 | 28883640 |
| AgamP4_3L | 28899898 | 28900421 |
| AgamP4_3L | 29005077 | 29005592 |
| AgamP4_3L | 29038109 | 29038621 |
| AgamP4_3L | 29149436 | 29150005 |
| AgamP4_3L | 29156860 | 29157589 |
| AgamP4_3L | 29166672 | 29167238 |
| AgamP4_3L | 29214510 | 29215090 |
| AgamP4_3L | 29417494 | 29418157 |
| AgamP4_3L | 29488446 | 29489031 |
| AgamP4_3L | 29488970 | 29489598 |
| AgamP4_3L | 29522375 | 29522929 |
| AgamP4_3L | 29644276 | 29644850 |

|           |          |          |
|-----------|----------|----------|
| AgamP4_3L | 29778566 | 29779112 |
| AgamP4_3L | 29847821 | 29848327 |
| AgamP4_3L | 29858736 | 29859280 |
| AgamP4_3L | 29911867 | 29912402 |
| AgamP4_3L | 30221447 | 30221950 |
| AgamP4_3L | 30323191 | 30323726 |
| AgamP4_3L | 30328019 | 30328657 |
| AgamP4_3L | 30477567 | 30478175 |
| AgamP4_3L | 30510993 | 30511514 |
| AgamP4_3L | 30513017 | 30513518 |
| AgamP4_3L | 30540819 | 30541321 |
| AgamP4_3L | 30548230 | 30548800 |
| AgamP4_3L | 30718404 | 30718919 |
| AgamP4_3L | 30785191 | 30785837 |
| AgamP4_3L | 30817261 | 30817764 |
| AgamP4_3L | 30819958 | 30820501 |
| AgamP4_3L | 30963377 | 30964015 |
| AgamP4_3L | 30996240 | 30996753 |
| AgamP4_3L | 31097633 | 31098135 |
| AgamP4_3L | 31362174 | 31362743 |
| AgamP4_3L | 31391614 | 31392153 |
| AgamP4_3L | 31393464 | 31393992 |
| AgamP4_3L | 31514153 | 31514671 |
| AgamP4_3L | 31541078 | 31541596 |
| AgamP4_3L | 31706694 | 31707284 |
| AgamP4_3L | 31729843 | 31730367 |
| AgamP4_3L | 31730698 | 31731221 |
| AgamP4_3L | 31734331 | 31734859 |
| AgamP4_3L | 31880480 | 31881019 |
| AgamP4_3L | 31983925 | 31984488 |
| AgamP4_3L | 32061681 | 32062187 |
| AgamP4_3L | 32077643 | 32078183 |
| AgamP4_3L | 32400459 | 32400959 |
| AgamP4_3L | 32874308 | 32874813 |
| AgamP4_3L | 32895670 | 32896213 |
| AgamP4_3L | 32907008 | 32907512 |
| AgamP4_3L | 32927234 | 32927853 |
| AgamP4_3L | 32932412 | 32933010 |
| AgamP4_3L | 32994348 | 32994854 |
| AgamP4_3L | 32995710 | 32996217 |
| AgamP4_3L | 33014468 | 33014995 |
| AgamP4_3L | 33072509 | 33073056 |
| AgamP4_3L | 33113746 | 33114299 |
| AgamP4_3L | 33148305 | 33148881 |
| AgamP4_3L | 33160109 | 33160682 |
| AgamP4_3L | 33188037 | 33188539 |
| AgamP4_3L | 33239291 | 33239802 |
| AgamP4_3L | 33241321 | 33241850 |
| AgamP4_3L | 33335440 | 33335951 |
| AgamP4_3L | 33362515 | 33363083 |

|           |          |          |
|-----------|----------|----------|
| AgamP4_3L | 33428084 | 33428585 |
| AgamP4_3L | 33598919 | 33599749 |
| AgamP4_3L | 33611243 | 33611789 |
| AgamP4_3L | 33644784 | 33645340 |
| AgamP4_3L | 33656812 | 33657338 |
| AgamP4_3L | 33658537 | 33659081 |
| AgamP4_3L | 33725235 | 33725744 |
| AgamP4_3L | 33806728 | 33807258 |
| AgamP4_3L | 33872650 | 33873373 |
| AgamP4_3L | 33874240 | 33874795 |
| AgamP4_3L | 33936341 | 33936869 |
| AgamP4_3L | 34028441 | 34029025 |
| AgamP4_3L | 34079920 | 34080465 |
| AgamP4_3L | 34097557 | 34098069 |
| AgamP4_3L | 34136818 | 34137383 |
| AgamP4_3L | 34146795 | 34147426 |
| AgamP4_3L | 34157050 | 34157585 |
| AgamP4_3L | 34193625 | 34194235 |
| AgamP4_3L | 34210756 | 34211347 |
| AgamP4_3L | 34213274 | 34213819 |
| AgamP4_3L | 34213858 | 34214473 |
| AgamP4_3L | 34219979 | 34220496 |
| AgamP4_3L | 34230491 | 34231007 |
| AgamP4_3L | 34280468 | 34281012 |
| AgamP4_3L | 34298149 | 34298770 |
| AgamP4_3L | 34318149 | 34318757 |
| AgamP4_3L | 34348365 | 34348926 |
| AgamP4_3L | 34367089 | 34367644 |
| AgamP4_3L | 34374313 | 34374855 |
| AgamP4_3L | 34493014 | 34493528 |
| AgamP4_3L | 34519751 | 34520276 |
| AgamP4_3L | 34520577 | 34521194 |
| AgamP4_3L | 34559031 | 34559554 |
| AgamP4_3L | 34573974 | 34574487 |
| AgamP4_3L | 34591647 | 34592147 |
| AgamP4_3L | 34601325 | 34601997 |
| AgamP4_3L | 34603868 | 34604372 |
| AgamP4_3L | 34652558 | 34653058 |
| AgamP4_3L | 34705516 | 34706147 |
| AgamP4_3L | 34721072 | 34721700 |
| AgamP4_3L | 34722415 | 34723065 |
| AgamP4_3L | 34755355 | 34755883 |
| AgamP4_3L | 34902333 | 34902842 |
| AgamP4_3L | 34935969 | 34936505 |
| AgamP4_3L | 34946468 | 34946983 |
| AgamP4_3L | 34990437 | 34990952 |
| AgamP4_3L | 34993559 | 34994107 |
| AgamP4_3L | 35015396 | 35016009 |
| AgamP4_3L | 35093795 | 35094353 |
| AgamP4_3L | 35120341 | 35120860 |

|           |          |          |
|-----------|----------|----------|
| AgamP4_3L | 35152580 | 35153087 |
| AgamP4_3L | 35179565 | 35180119 |
| AgamP4_3L | 35192267 | 35192807 |
| AgamP4_3L | 35342704 | 35343220 |
| AgamP4_3L | 35355319 | 35355825 |
| AgamP4_3L | 35420496 | 35421037 |
| AgamP4_3L | 35655370 | 35655901 |
| AgamP4_3L | 35657547 | 35658062 |
| AgamP4_3L | 35664353 | 35664854 |
| AgamP4_3L | 35714458 | 35714984 |
| AgamP4_3L | 35717021 | 35717652 |
| AgamP4_3L | 35726418 | 35726959 |
| AgamP4_3L | 35752068 | 35752571 |
| AgamP4_3L | 35769648 | 35770178 |
| AgamP4_3L | 35868362 | 35868916 |
| AgamP4_3L | 35902327 | 35902881 |
| AgamP4_3L | 36010566 | 36011295 |
| AgamP4_3L | 36056976 | 36057494 |
| AgamP4_3L | 36057577 | 36058084 |
| AgamP4_3L | 36147953 | 36148542 |
| AgamP4_3L | 36168323 | 36168831 |
| AgamP4_3L | 36177016 | 36177525 |
| AgamP4_3L | 36207668 | 36208168 |
| AgamP4_3L | 36236943 | 36237478 |
| AgamP4_3L | 36527075 | 36527785 |
| AgamP4_3L | 36533970 | 36534534 |
| AgamP4_3L | 36538974 | 36539565 |
| AgamP4_3L | 36554614 | 36555132 |
| AgamP4_3L | 36620414 | 36621008 |
| AgamP4_3L | 36638737 | 36639436 |
| AgamP4_3L | 36791269 | 36791775 |
| AgamP4_3L | 36887951 | 36888646 |
| AgamP4_3L | 36950975 | 36951476 |
| AgamP4_3L | 36989007 | 36989646 |
| AgamP4_3L | 37028905 | 37029432 |
| AgamP4_3L | 37157920 | 37158616 |
| AgamP4_3L | 37160635 | 37161326 |
| AgamP4_3L | 37235475 | 37236016 |
| AgamP4_3L | 37258528 | 37259088 |
| AgamP4_3L | 37279664 | 37280289 |
| AgamP4_3L | 37409528 | 37410082 |
| AgamP4_3L | 37511492 | 37512000 |
| AgamP4_3L | 37665045 | 37665661 |
| AgamP4_3L | 37678309 | 37678836 |
| AgamP4_3L | 37687552 | 37688181 |
| AgamP4_3L | 37714072 | 37714611 |
| AgamP4_3L | 37861545 | 37862050 |
| AgamP4_3L | 38053747 | 38054322 |
| AgamP4_3L | 38073521 | 38074109 |
| AgamP4_3L | 38080499 | 38081102 |

|           |          |          |
|-----------|----------|----------|
| AgamP4_3L | 38126374 | 38126891 |
| AgamP4_3L | 38207662 | 38208171 |
| AgamP4_3L | 38249955 | 38250698 |
| AgamP4_3L | 38265548 | 38266073 |
| AgamP4_3L | 38363317 | 38363942 |
| AgamP4_3L | 38436611 | 38437152 |
| AgamP4_3L | 38472935 | 38473504 |
| AgamP4_3L | 38502420 | 38502992 |
| AgamP4_3L | 38503288 | 38503870 |
| AgamP4_3L | 38521533 | 38522041 |
| AgamP4_3L | 38524213 | 38524722 |
| AgamP4_3L | 38556265 | 38556835 |
| AgamP4_3L | 38569376 | 38569913 |
| AgamP4_3L | 38578764 | 38579268 |
| AgamP4_3L | 38640506 | 38641067 |
| AgamP4_3L | 38722918 | 38723457 |
| AgamP4_3L | 38779791 | 38780465 |
| AgamP4_3L | 38840121 | 38840633 |
| AgamP4_3L | 38927435 | 38927964 |
| AgamP4_3L | 38938227 | 38938779 |
| AgamP4_3L | 38941581 | 38942129 |
| AgamP4_3L | 38942082 | 38942631 |
| AgamP4_3L | 38949491 | 38950197 |
| AgamP4_3L | 39133988 | 39134609 |
| AgamP4_3L | 39185492 | 39186000 |
| AgamP4_3L | 39199644 | 39200172 |
| AgamP4_3L | 39210486 | 39211027 |
| AgamP4_3L | 39219402 | 39219945 |
| AgamP4_3L | 39223822 | 39224339 |
| AgamP4_3L | 39224325 | 39224857 |
| AgamP4_3L | 39224894 | 39225397 |
| AgamP4_3L | 39229112 | 39229627 |
| AgamP4_3L | 39233520 | 39234025 |
| AgamP4_3L | 39234883 | 39235439 |
| AgamP4_3L | 39320080 | 39320598 |
| AgamP4_3L | 39371870 | 39372374 |
| AgamP4_3L | 39401814 | 39402330 |
| AgamP4_3L | 39417047 | 39417612 |
| AgamP4_3L | 39519536 | 39520078 |
| AgamP4_3L | 39534117 | 39534621 |
| AgamP4_3L | 39596383 | 39596944 |
| AgamP4_3L | 39615510 | 39616012 |
| AgamP4_3L | 39621489 | 39621989 |
| AgamP4_3L | 39673110 | 39673610 |
| AgamP4_3L | 39675808 | 39676326 |
| AgamP4_3L | 39812131 | 39812763 |
| AgamP4_3L | 39821196 | 39821778 |
| AgamP4_3L | 39836405 | 39836949 |
| AgamP4_3L | 39839030 | 39839540 |
| AgamP4_3L | 39853322 | 39853915 |

|           |          |          |
|-----------|----------|----------|
| AgamP4_3L | 39885249 | 39885757 |
| AgamP4_3L | 39887579 | 39888204 |
| AgamP4_3L | 40014038 | 40014632 |
| AgamP4_3L | 40031781 | 40032288 |
| AgamP4_3L | 40081688 | 40082268 |
| AgamP4_3L | 40132148 | 40132710 |
| AgamP4_3L | 40156177 | 40156679 |
| AgamP4_3L | 40164829 | 40165385 |
| AgamP4_3L | 40191238 | 40191820 |
| AgamP4_3L | 40215955 | 40216563 |
| AgamP4_3L | 40304108 | 40304643 |
| AgamP4_3L | 40473957 | 40474504 |
| AgamP4_3L | 40475870 | 40476438 |
| AgamP4_3L | 40623997 | 40624544 |
| AgamP4_3L | 40629858 | 40630380 |
| AgamP4_3L | 40669558 | 40670073 |
| AgamP4_3L | 40727040 | 40727599 |
| AgamP4_3L | 40802507 | 40803116 |
| AgamP4_3L | 40916408 | 40917025 |
| AgamP4_3L | 40948414 | 40948988 |
| AgamP4_3L | 41068334 | 41068954 |
| AgamP4_3L | 41071163 | 41071662 |
| AgamP4_3L | 41249173 | 41249721 |
| AgamP4_3L | 41252965 | 41253525 |
| AgamP4_3L | 41270314 | 41270874 |
| AgamP4_3L | 41298066 | 41298725 |
| AgamP4_3L | 41361273 | 41361794 |
| AgamP4_3L | 41449110 | 41449613 |
| AgamP4_3L | 41505492 | 41506049 |
| AgamP4_3L | 41546850 | 41547530 |
| AgamP4_3L | 41598901 | 41599581 |
| AgamP4_3L | 41873667 | 41874234 |
| AgamP4_3R | 183324   | 183877   |
| AgamP4_3R | 204528   | 205036   |
| AgamP4_3R | 289757   | 290329   |
| AgamP4_3R | 324224   | 324795   |
| AgamP4_3R | 349420   | 349960   |
| AgamP4_3R | 501231   | 501747   |
| AgamP4_3R | 580357   | 580893   |
| AgamP4_3R | 580861   | 581394   |
| AgamP4_3R | 627319   | 627850   |
| AgamP4_3R | 629578   | 630129   |
| AgamP4_3R | 771441   | 771967   |
| AgamP4_3R | 777743   | 778258   |
| AgamP4_3R | 813771   | 814309   |
| AgamP4_3R | 878444   | 878987   |
| AgamP4_3R | 961282   | 961793   |
| AgamP4_3R | 970075   | 970646   |
| AgamP4_3R | 977186   | 977701   |
| AgamP4_3R | 1130555  | 1131123  |

|           |         |         |
|-----------|---------|---------|
| AgamP4_3R | 1173135 | 1173640 |
| AgamP4_3R | 1195114 | 1195640 |
| AgamP4_3R | 1197413 | 1197995 |
| AgamP4_3R | 1203610 | 1204218 |
| AgamP4_3R | 1205540 | 1206148 |
| AgamP4_3R | 1391373 | 1391890 |
| AgamP4_3R | 1399864 | 1400514 |
| AgamP4_3R | 1417492 | 1418002 |
| AgamP4_3R | 1453446 | 1453977 |
| AgamP4_3R | 1480240 | 1480893 |
| AgamP4_3R | 1517260 | 1517834 |
| AgamP4_3R | 1536411 | 1537046 |
| AgamP4_3R | 1623425 | 1624083 |
| AgamP4_3R | 1631543 | 1632199 |
| AgamP4_3R | 1761546 | 1762108 |
| AgamP4_3R | 1788078 | 1788783 |
| AgamP4_3R | 1849606 | 1850120 |
| AgamP4_3R | 1881827 | 1882385 |
| AgamP4_3R | 1992663 | 1993167 |
| AgamP4_3R | 2125185 | 2125810 |
| AgamP4_3R | 2156502 | 2157011 |
| AgamP4_3R | 2165023 | 2165601 |
| AgamP4_3R | 2190669 | 2191229 |
| AgamP4_3R | 2280111 | 2280843 |
| AgamP4_3R | 2315469 | 2316016 |
| AgamP4_3R | 2352500 | 2353101 |
| AgamP4_3R | 2546112 | 2546633 |
| AgamP4_3R | 2586294 | 2586816 |
| AgamP4_3R | 2800596 | 2801142 |
| AgamP4_3R | 2810373 | 2811003 |
| AgamP4_3R | 2830337 | 2830858 |
| AgamP4_3R | 2960017 | 2960569 |
| AgamP4_3R | 2989481 | 2990016 |
| AgamP4_3R | 3095801 | 3096437 |
| AgamP4_3R | 3134118 | 3134622 |
| AgamP4_3R | 3183088 | 3183649 |
| AgamP4_3R | 3300416 | 3300933 |
| AgamP4_3R | 3421135 | 3421706 |
| AgamP4_3R | 3602595 | 3603104 |
| AgamP4_3R | 3664220 | 3664747 |
| AgamP4_3R | 3919273 | 3919830 |
| AgamP4_3R | 3934061 | 3934582 |
| AgamP4_3R | 3987033 | 3987618 |
| AgamP4_3R | 3996787 | 3997521 |
| AgamP4_3R | 4078988 | 4079568 |
| AgamP4_3R | 4143088 | 4143680 |
| AgamP4_3R | 4192357 | 4192871 |
| AgamP4_3R | 4221530 | 4222072 |
| AgamP4_3R | 4280413 | 4281062 |
| AgamP4_3R | 4375247 | 4375769 |

|           |         |         |
|-----------|---------|---------|
| AgamP4_3R | 4553987 | 4554527 |
| AgamP4_3R | 4639239 | 4639754 |
| AgamP4_3R | 4644361 | 4645027 |
| AgamP4_3R | 4661735 | 4662289 |
| AgamP4_3R | 4774352 | 4774931 |
| AgamP4_3R | 4775597 | 4776109 |
| AgamP4_3R | 4952011 | 4952554 |
| AgamP4_3R | 4963228 | 4963827 |
| AgamP4_3R | 5151912 | 5152420 |
| AgamP4_3R | 5166811 | 5167363 |
| AgamP4_3R | 5300085 | 5300629 |
| AgamP4_3R | 5413765 | 5414278 |
| AgamP4_3R | 5485217 | 5485722 |
| AgamP4_3R | 5506832 | 5507364 |
| AgamP4_3R | 5512282 | 5512798 |
| AgamP4_3R | 5522046 | 5522591 |
| AgamP4_3R | 5560135 | 5560779 |
| AgamP4_3R | 5563210 | 5563713 |
| AgamP4_3R | 5590092 | 5590605 |
| AgamP4_3R | 5660396 | 5660946 |
| AgamP4_3R | 5813184 | 5813821 |
| AgamP4_3R | 5827649 | 5828203 |
| AgamP4_3R | 5975650 | 5976198 |
| AgamP4_3R | 6003565 | 6004083 |
| AgamP4_3R | 6021396 | 6021956 |
| AgamP4_3R | 6041640 | 6042209 |
| AgamP4_3R | 6125988 | 6126617 |
| AgamP4_3R | 6192810 | 6193331 |
| AgamP4_3R | 6226810 | 6227313 |
| AgamP4_3R | 6262693 | 6263217 |
| AgamP4_3R | 6383754 | 6384287 |
| AgamP4_3R | 6410323 | 6410830 |
| AgamP4_3R | 6415457 | 6415997 |
| AgamP4_3R | 6455133 | 6455638 |
| AgamP4_3R | 6472020 | 6472742 |
| AgamP4_3R | 6567580 | 6568136 |
| AgamP4_3R | 6573189 | 6573927 |
| AgamP4_3R | 6584633 | 6585383 |
| AgamP4_3R | 6754063 | 6754606 |
| AgamP4_3R | 6809726 | 6810274 |
| AgamP4_3R | 6811700 | 6812285 |
| AgamP4_3R | 6909833 | 6910434 |
| AgamP4_3R | 6916266 | 6916858 |
| AgamP4_3R | 7129380 | 7130038 |
| AgamP4_3R | 7200841 | 7201470 |
| AgamP4_3R | 7301275 | 7301888 |
| AgamP4_3R | 7304513 | 7305107 |
| AgamP4_3R | 7329666 | 7330201 |
| AgamP4_3R | 7459330 | 7460022 |
| AgamP4_3R | 7481840 | 7482588 |

|           |          |          |
|-----------|----------|----------|
| AgamP4_3R | 7516633  | 7517140  |
| AgamP4_3R | 7701662  | 7702216  |
| AgamP4_3R | 7877026  | 7877553  |
| AgamP4_3R | 8025136  | 8025677  |
| AgamP4_3R | 8107116  | 8107627  |
| AgamP4_3R | 8117017  | 8117648  |
| AgamP4_3R | 8183111  | 8183694  |
| AgamP4_3R | 8263379  | 8264052  |
| AgamP4_3R | 8274824  | 8275333  |
| AgamP4_3R | 8638103  | 8638603  |
| AgamP4_3R | 8750807  | 8751323  |
| AgamP4_3R | 8804079  | 8804682  |
| AgamP4_3R | 8805062  | 8805602  |
| AgamP4_3R | 8903478  | 8904155  |
| AgamP4_3R | 9004464  | 9005063  |
| AgamP4_3R | 9387496  | 9388224  |
| AgamP4_3R | 9423049  | 9423571  |
| AgamP4_3R | 9442142  | 9442653  |
| AgamP4_3R | 9601109  | 9601626  |
| AgamP4_3R | 9606842  | 9607343  |
| AgamP4_3R | 9727080  | 9727609  |
| AgamP4_3R | 9730510  | 9731020  |
| AgamP4_3R | 10001413 | 10001963 |
| AgamP4_3R | 10013783 | 10014302 |
| AgamP4_3R | 10049119 | 10049648 |
| AgamP4_3R | 10054058 | 10054640 |
| AgamP4_3R | 10209693 | 10210205 |
| AgamP4_3R | 10231915 | 10232507 |
| AgamP4_3R | 10232415 | 10233017 |
| AgamP4_3R | 10246550 | 10247293 |
| AgamP4_3R | 10310765 | 10311314 |
| AgamP4_3R | 10360209 | 10360888 |
| AgamP4_3R | 10423458 | 10424021 |
| AgamP4_3R | 10439871 | 10440512 |
| AgamP4_3R | 10536448 | 10537062 |
| AgamP4_3R | 10598348 | 10598971 |
| AgamP4_3R | 10635847 | 10636379 |
| AgamP4_3R | 10714723 | 10715270 |
| AgamP4_3R | 10724838 | 10725363 |
| AgamP4_3R | 10735128 | 10735660 |
| AgamP4_3R | 10741653 | 10742173 |
| AgamP4_3R | 10830636 | 10831182 |
| AgamP4_3R | 10895760 | 10896305 |
| AgamP4_3R | 11171333 | 11171941 |
| AgamP4_3R | 11254001 | 11254502 |
| AgamP4_3R | 11265780 | 11266344 |
| AgamP4_3R | 11314104 | 11314826 |
| AgamP4_3R | 11334890 | 11335419 |
| AgamP4_3R | 11376658 | 11377169 |
| AgamP4_3R | 11556198 | 11556751 |

|           |          |          |
|-----------|----------|----------|
| AgamP4_3R | 11721584 | 11722109 |
| AgamP4_3R | 11751947 | 11752566 |
| AgamP4_3R | 11790103 | 11790634 |
| AgamP4_3R | 11805489 | 11805998 |
| AgamP4_3R | 11930347 | 11930927 |
| AgamP4_3R | 11968159 | 11968756 |
| AgamP4_3R | 12104919 | 12105603 |
| AgamP4_3R | 12107822 | 12108351 |
| AgamP4_3R | 12133406 | 12133987 |
| AgamP4_3R | 12210758 | 12211263 |
| AgamP4_3R | 12237923 | 12238427 |
| AgamP4_3R | 12273496 | 12274018 |
| AgamP4_3R | 12333108 | 12333625 |
| AgamP4_3R | 12380227 | 12380809 |
| AgamP4_3R | 12470790 | 12471469 |
| AgamP4_3R | 12582314 | 12582906 |
| AgamP4_3R | 12816658 | 12817196 |
| AgamP4_3R | 12901809 | 12902348 |
| AgamP4_3R | 13036921 | 13037466 |
| AgamP4_3R | 13127352 | 13127920 |
| AgamP4_3R | 13285877 | 13286638 |
| AgamP4_3R | 13355657 | 13356156 |
| AgamP4_3R | 13387998 | 13388612 |
| AgamP4_3R | 13391327 | 13391939 |
| AgamP4_3R | 13490296 | 13490810 |
| AgamP4_3R | 13645965 | 13646577 |
| AgamP4_3R | 13722762 | 13723279 |
| AgamP4_3R | 13803705 | 13804427 |
| AgamP4_3R | 13808886 | 13809504 |
| AgamP4_3R | 13863045 | 13863565 |
| AgamP4_3R | 13866209 | 13866788 |
| AgamP4_3R | 13900082 | 13900806 |
| AgamP4_3R | 13915610 | 13916167 |
| AgamP4_3R | 14012941 | 14013469 |
| AgamP4_3R | 14105443 | 14105948 |
| AgamP4_3R | 14280434 | 14281030 |
| AgamP4_3R | 14384929 | 14385452 |
| AgamP4_3R | 14407158 | 14407661 |
| AgamP4_3R | 14494718 | 14495498 |
| AgamP4_3R | 14610315 | 14610848 |
| AgamP4_3R | 14669984 | 14670566 |
| AgamP4_3R | 14674074 | 14674816 |
| AgamP4_3R | 14694939 | 14695505 |
| AgamP4_3R | 14766415 | 14766968 |
| AgamP4_3R | 14798230 | 14798767 |
| AgamP4_3R | 14843499 | 14844124 |
| AgamP4_3R | 14945846 | 14946418 |
| AgamP4_3R | 14961127 | 14961627 |
| AgamP4_3R | 14992070 | 14992600 |
| AgamP4_3R | 15061600 | 15062115 |

|           |          |          |
|-----------|----------|----------|
| AgamP4_3R | 15228177 | 15228712 |
| AgamP4_3R | 15235456 | 15236108 |
| AgamP4_3R | 15403192 | 15403738 |
| AgamP4_3R | 15404032 | 15404632 |
| AgamP4_3R | 15420934 | 15421449 |
| AgamP4_3R | 15452041 | 15452659 |
| AgamP4_3R | 15468813 | 15469400 |
| AgamP4_3R | 15486006 | 15486516 |
| AgamP4_3R | 15499580 | 15500155 |
| AgamP4_3R | 15620251 | 15620752 |
| AgamP4_3R | 15698592 | 15699097 |
| AgamP4_3R | 15725153 | 15725749 |
| AgamP4_3R | 15727151 | 15727869 |
| AgamP4_3R | 15824319 | 15824930 |
| AgamP4_3R | 15844115 | 15844649 |
| AgamP4_3R | 15969907 | 15970423 |
| AgamP4_3R | 15989072 | 15989577 |
| AgamP4_3R | 16011467 | 16011975 |
| AgamP4_3R | 16062147 | 16062693 |
| AgamP4_3R | 16100724 | 16101246 |
| AgamP4_3R | 16121938 | 16122514 |
| AgamP4_3R | 16175717 | 16176245 |
| AgamP4_3R | 16176222 | 16176762 |
| AgamP4_3R | 16262827 | 16263371 |
| AgamP4_3R | 16346013 | 16346726 |
| AgamP4_3R | 16349208 | 16349756 |
| AgamP4_3R | 16349756 | 16350259 |
| AgamP4_3R | 16350324 | 16350952 |
| AgamP4_3R | 16408793 | 16409351 |
| AgamP4_3R | 16548253 | 16548790 |
| AgamP4_3R | 16579663 | 16580399 |
| AgamP4_3R | 16661618 | 16662145 |
| AgamP4_3R | 16831037 | 16831554 |
| AgamP4_3R | 16903206 | 16903753 |
| AgamP4_3R | 17253038 | 17253582 |
| AgamP4_3R | 17269912 | 17270437 |
| AgamP4_3R | 17345960 | 17346466 |
| AgamP4_3R | 17384600 | 17385138 |
| AgamP4_3R | 17706573 | 17707248 |
| AgamP4_3R | 17754903 | 17755438 |
| AgamP4_3R | 17795623 | 17796217 |
| AgamP4_3R | 17881924 | 17882445 |
| AgamP4_3R | 18125514 | 18126075 |
| AgamP4_3R | 18173305 | 18173869 |
| AgamP4_3R | 18195282 | 18195782 |
| AgamP4_3R | 18209751 | 18210261 |
| AgamP4_3R | 18245037 | 18245584 |
| AgamP4_3R | 18250910 | 18251438 |
| AgamP4_3R | 18455744 | 18456346 |
| AgamP4_3R | 18475752 | 18476404 |

|           |          |          |
|-----------|----------|----------|
| AgamP4_3R | 18612387 | 18613078 |
| AgamP4_3R | 18616832 | 18617358 |
| AgamP4_3R | 18943194 | 18943707 |
| AgamP4_3R | 19154449 | 19155005 |
| AgamP4_3R | 19181483 | 19182105 |
| AgamP4_3R | 19434379 | 19434916 |
| AgamP4_3R | 19456351 | 19456857 |
| AgamP4_3R | 19468538 | 19469162 |
| AgamP4_3R | 19472428 | 19473003 |
| AgamP4_3R | 19709372 | 19709890 |
| AgamP4_3R | 19768092 | 19768662 |
| AgamP4_3R | 19776328 | 19776894 |
| AgamP4_3R | 19789229 | 19789729 |
| AgamP4_3R | 19817794 | 19818378 |
| AgamP4_3R | 19843509 | 19844023 |
| AgamP4_3R | 19848390 | 19848919 |
| AgamP4_3R | 19898007 | 19898535 |
| AgamP4_3R | 19921397 | 19921896 |
| AgamP4_3R | 20006714 | 20007346 |
| AgamP4_3R | 20080565 | 20081065 |
| AgamP4_3R | 20083604 | 20084119 |
| AgamP4_3R | 20106613 | 20107134 |
| AgamP4_3R | 20126189 | 20126727 |
| AgamP4_3R | 20251981 | 20252574 |
| AgamP4_3R | 20306412 | 20306994 |
| AgamP4_3R | 20511792 | 20512355 |
| AgamP4_3R | 20607936 | 20608548 |
| AgamP4_3R | 20618218 | 20618731 |
| AgamP4_3R | 20623017 | 20623528 |
| AgamP4_3R | 20625691 | 20626233 |
| AgamP4_3R | 20752347 | 20752983 |
| AgamP4_3R | 20941160 | 20941682 |
| AgamP4_3R | 21032861 | 21033491 |
| AgamP4_3R | 21110508 | 21111011 |
| AgamP4_3R | 21124008 | 21124523 |
| AgamP4_3R | 21124940 | 21125512 |
| AgamP4_3R | 21313120 | 21313661 |
| AgamP4_3R | 21351282 | 21351830 |
| AgamP4_3R | 21356762 | 21357264 |
| AgamP4_3R | 21410974 | 21411639 |
| AgamP4_3R | 21581665 | 21582208 |
| AgamP4_3R | 21602336 | 21602838 |
| AgamP4_3R | 21612621 | 21613265 |
| AgamP4_3R | 21666882 | 21667413 |
| AgamP4_3R | 21695923 | 21696481 |
| AgamP4_3R | 21740303 | 21740853 |
| AgamP4_3R | 21741324 | 21741830 |
| AgamP4_3R | 21746150 | 21746658 |
| AgamP4_3R | 21792031 | 21792532 |
| AgamP4_3R | 21891187 | 21891700 |

|           |          |          |
|-----------|----------|----------|
| AgamP4_3R | 21949541 | 21950121 |
| AgamP4_3R | 21956252 | 21956829 |
| AgamP4_3R | 21993116 | 21993648 |
| AgamP4_3R | 22005376 | 22005899 |
| AgamP4_3R | 22022314 | 22022970 |
| AgamP4_3R | 22123338 | 22123841 |
| AgamP4_3R | 22242122 | 22242693 |
| AgamP4_3R | 22311739 | 22312267 |
| AgamP4_3R | 22382245 | 22382768 |
| AgamP4_3R | 22393442 | 22394002 |
| AgamP4_3R | 22602926 | 22603597 |
| AgamP4_3R | 22607060 | 22607694 |
| AgamP4_3R | 22610248 | 22610824 |
| AgamP4_3R | 22645162 | 22645678 |
| AgamP4_3R | 22745106 | 22745606 |
| AgamP4_3R | 22777050 | 22777585 |
| AgamP4_3R | 22804599 | 22805107 |
| AgamP4_3R | 22814088 | 22814610 |
| AgamP4_3R | 22917042 | 22917565 |
| AgamP4_3R | 22967951 | 22968460 |
| AgamP4_3R | 22981133 | 22981671 |
| AgamP4_3R | 23054401 | 23054917 |
| AgamP4_3R | 23123634 | 23124154 |
| AgamP4_3R | 23182636 | 23183201 |
| AgamP4_3R | 23281886 | 23282395 |
| AgamP4_3R | 23335814 | 23336342 |
| AgamP4_3R | 23364348 | 23365040 |
| AgamP4_3R | 23462965 | 23463495 |
| AgamP4_3R | 23552211 | 23552718 |
| AgamP4_3R | 23558581 | 23559084 |
| AgamP4_3R | 23571321 | 23571982 |
| AgamP4_3R | 23606293 | 23606801 |
| AgamP4_3R | 23629719 | 23630230 |
| AgamP4_3R | 23699207 | 23699712 |
| AgamP4_3R | 23740339 | 23740968 |
| AgamP4_3R | 23767955 | 23768589 |
| AgamP4_3R | 23784202 | 23784808 |
| AgamP4_3R | 23881161 | 23881661 |
| AgamP4_3R | 24326739 | 24327251 |
| AgamP4_3R | 24343521 | 24344043 |
| AgamP4_3R | 24381802 | 24382353 |
| AgamP4_3R | 24413069 | 24413622 |
| AgamP4_3R | 24422016 | 24422542 |
| AgamP4_3R | 24474475 | 24475243 |
| AgamP4_3R | 24483831 | 24484344 |
| AgamP4_3R | 24656379 | 24656886 |
| AgamP4_3R | 24706790 | 24707463 |
| AgamP4_3R | 24748579 | 24749117 |
| AgamP4_3R | 24749081 | 24749617 |
| AgamP4_3R | 24876401 | 24876928 |

|           |          |          |
|-----------|----------|----------|
| AgamP4_3R | 24880275 | 24880778 |
| AgamP4_3R | 24901353 | 24901864 |
| AgamP4_3R | 24957953 | 24958463 |
| AgamP4_3R | 24958456 | 24958985 |
| AgamP4_3R | 25018174 | 25018680 |
| AgamP4_3R | 25195572 | 25196071 |
| AgamP4_3R | 25204047 | 25204563 |
| AgamP4_3R | 25282609 | 25283128 |
| AgamP4_3R | 25313537 | 25314038 |
| AgamP4_3R | 25321860 | 25322359 |
| AgamP4_3R | 25327551 | 25328052 |
| AgamP4_3R | 25328911 | 25329439 |
| AgamP4_3R | 25335057 | 25335573 |
| AgamP4_3R | 25341687 | 25342217 |
| AgamP4_3R | 25345145 | 25345659 |
| AgamP4_3R | 25345650 | 25346159 |
| AgamP4_3R | 25380477 | 25381040 |
| AgamP4_3R | 25381882 | 25382477 |
| AgamP4_3R | 25388337 | 25388890 |
| AgamP4_3R | 25431404 | 25431980 |
| AgamP4_3R | 25444939 | 25445453 |
| AgamP4_3R | 25534913 | 25535435 |
| AgamP4_3R | 25747422 | 25747992 |
| AgamP4_3R | 25756726 | 25757394 |
| AgamP4_3R | 25810867 | 25811399 |
| AgamP4_3R | 25953490 | 25954002 |
| AgamP4_3R | 26015553 | 26016104 |
| AgamP4_3R | 26074260 | 26074794 |
| AgamP4_3R | 26158942 | 26159504 |
| AgamP4_3R | 26217305 | 26217823 |
| AgamP4_3R | 26388775 | 26389279 |
| AgamP4_3R | 26413575 | 26414086 |
| AgamP4_3R | 26426410 | 26426931 |
| AgamP4_3R | 26431208 | 26431753 |
| AgamP4_3R | 26453583 | 26454193 |
| AgamP4_3R | 26486035 | 26486581 |
| AgamP4_3R | 26530999 | 26531520 |
| AgamP4_3R | 26550442 | 26550996 |
| AgamP4_3R | 26556719 | 26557275 |
| AgamP4_3R | 26754080 | 26754586 |
| AgamP4_3R | 26799145 | 26799679 |
| AgamP4_3R | 26814298 | 26814809 |
| AgamP4_3R | 27005549 | 27006212 |
| AgamP4_3R | 27026663 | 27027228 |
| AgamP4_3R | 27196131 | 27196708 |
| AgamP4_3R | 27361096 | 27361673 |
| AgamP4_3R | 27374708 | 27375224 |
| AgamP4_3R | 27454959 | 27455575 |
| AgamP4_3R | 27472688 | 27473213 |
| AgamP4_3R | 27482525 | 27483038 |

|           |          |          |
|-----------|----------|----------|
| AgamP4_3R | 27484032 | 27484575 |
| AgamP4_3R | 27566697 | 27567201 |
| AgamP4_3R | 27602912 | 27603522 |
| AgamP4_3R | 27674862 | 27675560 |
| AgamP4_3R | 27762027 | 27762713 |
| AgamP4_3R | 27820337 | 27820849 |
| AgamP4_3R | 27917764 | 27918263 |
| AgamP4_3R | 27935957 | 27936465 |
| AgamP4_3R | 28052025 | 28052736 |
| AgamP4_3R | 28062822 | 28063487 |
| AgamP4_3R | 28071493 | 28072092 |
| AgamP4_3R | 28131176 | 28131704 |
| AgamP4_3R | 28132276 | 28132812 |
| AgamP4_3R | 28138077 | 28138595 |
| AgamP4_3R | 28160082 | 28160704 |
| AgamP4_3R | 28416264 | 28416868 |
| AgamP4_3R | 28490273 | 28490794 |
| AgamP4_3R | 28563491 | 28564025 |
| AgamP4_3R | 28570316 | 28570829 |
| AgamP4_3R | 28607898 | 28608471 |
| AgamP4_3R | 28620683 | 28621256 |
| AgamP4_3R | 28626825 | 28627372 |
| AgamP4_3R | 28639519 | 28640025 |
| AgamP4_3R | 28640037 | 28640538 |
| AgamP4_3R | 28642276 | 28642797 |
| AgamP4_3R | 28705580 | 28706332 |
| AgamP4_3R | 28819010 | 28819524 |
| AgamP4_3R | 28880398 | 28881018 |
| AgamP4_3R | 28898196 | 28898744 |
| AgamP4_3R | 28923919 | 28924451 |
| AgamP4_3R | 28967941 | 28968472 |
| AgamP4_3R | 29035930 | 29036503 |
| AgamP4_3R | 29051600 | 29052127 |
| AgamP4_3R | 29232654 | 29233175 |
| AgamP4_3R | 29238065 | 29238630 |
| AgamP4_3R | 29247809 | 29248310 |
| AgamP4_3R | 29263607 | 29264181 |
| AgamP4_3R | 29342720 | 29343302 |
| AgamP4_3R | 29353507 | 29354031 |
| AgamP4_3R | 29466561 | 29467165 |
| AgamP4_3R | 29486383 | 29486891 |
| AgamP4_3R | 29613307 | 29613904 |
| AgamP4_3R | 29703865 | 29704472 |
| AgamP4_3R | 29756253 | 29756769 |
| AgamP4_3R | 29775709 | 29776422 |
| AgamP4_3R | 29778656 | 29779157 |
| AgamP4_3R | 29967654 | 29968189 |
| AgamP4_3R | 29968159 | 29968713 |
| AgamP4_3R | 30054988 | 30055516 |
| AgamP4_3R | 30068139 | 30068733 |

|           |          |          |
|-----------|----------|----------|
| AgamP4_3R | 30085886 | 30086408 |
| AgamP4_3R | 30086416 | 30087001 |
| AgamP4_3R | 30091558 | 30092105 |
| AgamP4_3R | 30107590 | 30108121 |
| AgamP4_3R | 30194201 | 30194762 |
| AgamP4_3R | 30223908 | 30224451 |
| AgamP4_3R | 30249433 | 30249973 |
| AgamP4_3R | 30262260 | 30262837 |
| AgamP4_3R | 30271600 | 30272173 |
| AgamP4_3R | 30318164 | 30318684 |
| AgamP4_3R | 30318668 | 30319209 |
| AgamP4_3R | 30662001 | 30662535 |
| AgamP4_3R | 30667310 | 30667930 |
| AgamP4_3R | 30672971 | 30673582 |
| AgamP4_3R | 30689483 | 30690071 |
| AgamP4_3R | 31050676 | 31051224 |
| AgamP4_3R | 31122589 | 31123099 |
| AgamP4_3R | 31200805 | 31201320 |
| AgamP4_3R | 31265486 | 31266108 |
| AgamP4_3R | 31363621 | 31364175 |
| AgamP4_3R | 31381195 | 31381837 |
| AgamP4_3R | 31415752 | 31416276 |
| AgamP4_3R | 31423115 | 31423630 |
| AgamP4_3R | 31456579 | 31457178 |
| AgamP4_3R | 31459177 | 31459895 |
| AgamP4_3R | 31469194 | 31469719 |
| AgamP4_3R | 31603779 | 31604380 |
| AgamP4_3R | 31604350 | 31604918 |
| AgamP4_3R | 31619841 | 31620409 |
| AgamP4_3R | 31629015 | 31629527 |
| AgamP4_3R | 31640758 | 31641295 |
| AgamP4_3R | 31795356 | 31795911 |
| AgamP4_3R | 32004552 | 32005281 |
| AgamP4_3R | 32119877 | 32120465 |
| AgamP4_3R | 32125677 | 32126190 |
| AgamP4_3R | 32230329 | 32230875 |
| AgamP4_3R | 32238482 | 32238981 |
| AgamP4_3R | 32904691 | 32905193 |
| AgamP4_3R | 33066307 | 33067029 |
| AgamP4_3R | 33080260 | 33080883 |
| AgamP4_3R | 33174939 | 33175459 |
| AgamP4_3R | 33189162 | 33189691 |
| AgamP4_3R | 33284817 | 33285363 |
| AgamP4_3R | 33296480 | 33297183 |
| AgamP4_3R | 33319973 | 33320519 |
| AgamP4_3R | 33449878 | 33450507 |
| AgamP4_3R | 33565602 | 33566175 |
| AgamP4_3R | 33628454 | 33628971 |
| AgamP4_3R | 33702274 | 33702869 |
| AgamP4_3R | 33959908 | 33960412 |

|           |          |          |
|-----------|----------|----------|
| AgamP4_3R | 34007404 | 34008069 |
| AgamP4_3R | 34018894 | 34019416 |
| AgamP4_3R | 34055321 | 34055826 |
| AgamP4_3R | 34260268 | 34260916 |
| AgamP4_3R | 34275249 | 34275802 |
| AgamP4_3R | 34523756 | 34524259 |
| AgamP4_3R | 34534902 | 34535470 |
| AgamP4_3R | 34878161 | 34878704 |
| AgamP4_3R | 34980265 | 34980768 |
| AgamP4_3R | 34980765 | 34981282 |
| AgamP4_3R | 34983417 | 34984045 |
| AgamP4_3R | 35016400 | 35016968 |
| AgamP4_3R | 35220625 | 35221176 |
| AgamP4_3R | 35250610 | 35251419 |
| AgamP4_3R | 35321183 | 35321697 |
| AgamP4_3R | 35323525 | 35324126 |
| AgamP4_3R | 35324772 | 35325300 |
| AgamP4_3R | 35337555 | 35338226 |
| AgamP4_3R | 35350758 | 35351260 |
| AgamP4_3R | 35548072 | 35548653 |
| AgamP4_3R | 35609130 | 35609657 |
| AgamP4_3R | 35618928 | 35619458 |
| AgamP4_3R | 35944769 | 35945284 |
| AgamP4_3R | 36089951 | 36090457 |
| AgamP4_3R | 36109991 | 36110518 |
| AgamP4_3R | 36128647 | 36129165 |
| AgamP4_3R | 36174017 | 36174657 |
| AgamP4_3R | 36277880 | 36278599 |
| AgamP4_3R | 36355501 | 36356049 |
| AgamP4_3R | 36452138 | 36452676 |
| AgamP4_3R | 36470778 | 36471302 |
| AgamP4_3R | 36485780 | 36486318 |
| AgamP4_3R | 36679916 | 36680434 |
| AgamP4_3R | 36687726 | 36688238 |
| AgamP4_3R | 36760000 | 36760499 |
| AgamP4_3R | 36760505 | 36761048 |
| AgamP4_3R | 36826689 | 36827193 |
| AgamP4_3R | 36838325 | 36838852 |
| AgamP4_3R | 37132374 | 37132926 |
| AgamP4_3R | 37152927 | 37153547 |
| AgamP4_3R | 37233429 | 37233967 |
| AgamP4_3R | 37410448 | 37410992 |
| AgamP4_3R | 37491532 | 37492075 |
| AgamP4_3R | 37493172 | 37493687 |
| AgamP4_3R | 37505080 | 37505591 |
| AgamP4_3R | 37557336 | 37557889 |
| AgamP4_3R | 37632149 | 37632732 |
| AgamP4_3R | 37723120 | 37723663 |
| AgamP4_3R | 37809480 | 37809986 |
| AgamP4_3R | 37851319 | 37851907 |

|           |          |          |
|-----------|----------|----------|
| AgamP4_3R | 37853376 | 37853886 |
| AgamP4_3R | 37945373 | 37945963 |
| AgamP4_3R | 37974161 | 37974694 |
| AgamP4_3R | 38173755 | 38174285 |
| AgamP4_3R | 38204164 | 38204705 |
| AgamP4_3R | 38219398 | 38219908 |
| AgamP4_3R | 38226693 | 38227194 |
| AgamP4_3R | 38378235 | 38378743 |
| AgamP4_3R | 38380633 | 38381138 |
| AgamP4_3R | 38382606 | 38383157 |
| AgamP4_3R | 38385384 | 38385893 |
| AgamP4_3R | 38452623 | 38453237 |
| AgamP4_3R | 38566691 | 38567534 |
| AgamP4_3R | 38727289 | 38727838 |
| AgamP4_3R | 38890627 | 38891132 |
| AgamP4_3R | 38938075 | 38938660 |
| AgamP4_3R | 38944288 | 38944810 |
| AgamP4_3R | 39240060 | 39240605 |
| AgamP4_3R | 39277347 | 39277877 |
| AgamP4_3R | 39682925 | 39683529 |
| AgamP4_3R | 39923558 | 39924115 |
| AgamP4_3R | 40210866 | 40211463 |
| AgamP4_3R | 40439905 | 40440447 |
| AgamP4_3R | 40593059 | 40593597 |
| AgamP4_3R | 40709132 | 40709637 |
| AgamP4_3R | 40901359 | 40901882 |
| AgamP4_3R | 40968052 | 40968635 |
| AgamP4_3R | 41316475 | 41317063 |
| AgamP4_3R | 41331710 | 41332211 |
| AgamP4_3R | 41386495 | 41387006 |
| AgamP4_3R | 41390385 | 41390913 |
| AgamP4_3R | 41419214 | 41419755 |
| AgamP4_3R | 41588465 | 41589069 |
| AgamP4_3R | 41615419 | 41615921 |
| AgamP4_3R | 41616082 | 41616597 |
| AgamP4_3R | 41660684 | 41661193 |
| AgamP4_3R | 41680846 | 41681382 |
| AgamP4_3R | 41708433 | 41708954 |
| AgamP4_3R | 41773921 | 41774493 |
| AgamP4_3R | 41815791 | 41816524 |
| AgamP4_3R | 41816304 | 41817067 |
| AgamP4_3R | 41876851 | 41877396 |
| AgamP4_3R | 41890705 | 41891226 |
| AgamP4_3R | 42059344 | 42059846 |
| AgamP4_3R | 42070736 | 42071295 |
| AgamP4_3R | 42247600 | 42248115 |
| AgamP4_3R | 42460487 | 42460990 |
| AgamP4_3R | 42462680 | 42463205 |
| AgamP4_3R | 42463679 | 42464209 |
| AgamP4_3R | 42466441 | 42466990 |

|           |          |          |
|-----------|----------|----------|
| AgamP4_3R | 42532893 | 42533427 |
| AgamP4_3R | 42568543 | 42569120 |
| AgamP4_3R | 42591647 | 42592220 |
| AgamP4_3R | 42603374 | 42603944 |
| AgamP4_3R | 42620004 | 42620545 |
| AgamP4_3R | 42620844 | 42621654 |
| AgamP4_3R | 42621745 | 42622290 |
| AgamP4_3R | 42622531 | 42623224 |
| AgamP4_3R | 42624124 | 42624623 |
| AgamP4_3R | 42626381 | 42626901 |
| AgamP4_3R | 42645179 | 42645745 |
| AgamP4_3R | 42804499 | 42805137 |
| AgamP4_3R | 42972608 | 42973120 |
| AgamP4_3R | 43283304 | 43283849 |
| AgamP4_3R | 43296070 | 43296591 |
| AgamP4_3R | 43406364 | 43406888 |
| AgamP4_3R | 43563417 | 43563930 |
| AgamP4_3R | 43654103 | 43654628 |
| AgamP4_3R | 43842701 | 43843230 |
| AgamP4_3R | 44071266 | 44071787 |
| AgamP4_3R | 44095447 | 44095977 |
| AgamP4_3R | 44095957 | 44096478 |
| AgamP4_3R | 44271873 | 44272452 |
| AgamP4_3R | 44285405 | 44285918 |
| AgamP4_3R | 44438778 | 44439282 |
| AgamP4_3R | 44493959 | 44494491 |
| AgamP4_3R | 44500813 | 44501326 |
| AgamP4_3R | 44501324 | 44501839 |
| AgamP4_3R | 44506746 | 44507446 |
| AgamP4_3R | 44508788 | 44509353 |
| AgamP4_3R | 44550563 | 44551224 |
| AgamP4_3R | 44558430 | 44559018 |
| AgamP4_3R | 44571914 | 44572458 |
| AgamP4_3R | 44572453 | 44572989 |
| AgamP4_3R | 44737149 | 44737816 |
| AgamP4_3R | 44780849 | 44781421 |
| AgamP4_3R | 44998259 | 44998781 |
| AgamP4_3R | 45052867 | 45053403 |
| AgamP4_3R | 45055328 | 45055857 |
| AgamP4_3R | 45115533 | 45116035 |
| AgamP4_3R | 45171459 | 45171965 |
| AgamP4_3R | 45305117 | 45305685 |
| AgamP4_3R | 45617231 | 45617767 |
| AgamP4_3R | 45763790 | 45764309 |
| AgamP4_3R | 45804833 | 45805346 |
| AgamP4_3R | 45805333 | 45805846 |
| AgamP4_3R | 45961915 | 45962482 |
| AgamP4_3R | 46154725 | 46155230 |
| AgamP4_3R | 46240265 | 46240788 |
| AgamP4_3R | 46418064 | 46418593 |

|           |          |          |
|-----------|----------|----------|
| AgamP4_3R | 47086259 | 47086817 |
| AgamP4_3R | 47141304 | 47141814 |
| AgamP4_3R | 47266696 | 47267198 |
| AgamP4_3R | 47267198 | 47267698 |
| AgamP4_3R | 47268006 | 47268553 |
| AgamP4_3R | 47280170 | 47280769 |
| AgamP4_3R | 47315461 | 47315981 |
| AgamP4_3R | 47315961 | 47316841 |
| AgamP4_3R | 47448913 | 47449454 |
| AgamP4_3R | 47748544 | 47749133 |
| AgamP4_3R | 48088871 | 48089501 |
| AgamP4_3R | 48409192 | 48409835 |
| AgamP4_3R | 48412504 | 48413048 |
| AgamP4_3R | 48689544 | 48690059 |
| AgamP4_3R | 48863818 | 48864351 |
| AgamP4_3R | 49518209 | 49518720 |
| AgamP4_3R | 49827977 | 49828500 |
| AgamP4_3R | 49840988 | 49841493 |
| AgamP4_3R | 50359723 | 50360265 |
| AgamP4_3R | 50378621 | 50379129 |
| AgamP4_3R | 50459594 | 50460144 |
| AgamP4_3R | 50628774 | 50629374 |
| AgamP4_3R | 50672658 | 50673193 |
| AgamP4_3R | 51179254 | 51179777 |
| AgamP4_3R | 51241445 | 51242086 |
| AgamP4_3R | 51261192 | 51261714 |
| AgamP4_3R | 51547271 | 51547786 |
| AgamP4_3R | 51912612 | 51913197 |
| AgamP4_3R | 52533831 | 52534358 |
| AgamP4_X  | 19931    | 20439    |
| AgamP4_X  | 135449   | 135950   |
| AgamP4_X  | 149741   | 150249   |
| AgamP4_X  | 151140   | 151714   |
| AgamP4_X  | 178428   | 178939   |
| AgamP4_X  | 336001   | 336518   |
| AgamP4_X  | 362003   | 362562   |
| AgamP4_X  | 411684   | 412204   |
| AgamP4_X  | 558394   | 558894   |
| AgamP4_X  | 569841   | 570350   |
| AgamP4_X  | 583059   | 583750   |
| AgamP4_X  | 635012   | 635543   |
| AgamP4_X  | 745245   | 745779   |
| AgamP4_X  | 849864   | 850488   |
| AgamP4_X  | 850365   | 850993   |
| AgamP4_X  | 866120   | 866684   |
| AgamP4_X  | 883904   | 884461   |
| AgamP4_X  | 966103   | 966616   |
| AgamP4_X  | 983613   | 984256   |
| AgamP4_X  | 1008336  | 1008908  |
| AgamP4_X  | 1064929  | 1065512  |

|          |         |         |
|----------|---------|---------|
| AgamP4_X | 1252875 | 1253565 |
| AgamP4_X | 1260508 | 1261038 |
| AgamP4_X | 1278607 | 1279242 |
| AgamP4_X | 1460451 | 1460994 |
| AgamP4_X | 1476515 | 1477036 |
| AgamP4_X | 1492606 | 1493106 |
| AgamP4_X | 1519398 | 1519930 |
| AgamP4_X | 1553649 | 1554151 |
| AgamP4_X | 1675678 | 1676324 |
| AgamP4_X | 1679524 | 1680115 |
| AgamP4_X | 1889001 | 1889536 |
| AgamP4_X | 1930397 | 1930916 |
| AgamP4_X | 2031212 | 2031802 |
| AgamP4_X | 2211663 | 2212268 |
| AgamP4_X | 2242377 | 2242912 |
| AgamP4_X | 2251456 | 2252076 |
| AgamP4_X | 2261510 | 2262186 |
| AgamP4_X | 2306692 | 2307241 |
| AgamP4_X | 2484149 | 2484669 |
| AgamP4_X | 2507161 | 2507705 |
| AgamP4_X | 2795852 | 2796362 |
| AgamP4_X | 2829747 | 2830316 |
| AgamP4_X | 2839620 | 2840165 |
| AgamP4_X | 2862130 | 2862659 |
| AgamP4_X | 2914003 | 2914527 |
| AgamP4_X | 3013206 | 3013707 |
| AgamP4_X | 3382823 | 3383336 |
| AgamP4_X | 3433714 | 3434256 |
| AgamP4_X | 3495646 | 3496205 |
| AgamP4_X | 3572862 | 3573419 |
| AgamP4_X | 3636906 | 3637439 |
| AgamP4_X | 3739103 | 3739621 |
| AgamP4_X | 3751647 | 3752255 |
| AgamP4_X | 3856499 | 3857065 |
| AgamP4_X | 3857505 | 3858125 |
| AgamP4_X | 3860133 | 3860703 |
| AgamP4_X | 3860723 | 3861274 |
| AgamP4_X | 3873693 | 3874257 |
| AgamP4_X | 3948166 | 3948666 |
| AgamP4_X | 3960923 | 3961434 |
| AgamP4_X | 4120443 | 4120981 |
| AgamP4_X | 4188683 | 4189372 |
| AgamP4_X | 4286837 | 4287407 |
| AgamP4_X | 4292491 | 4293112 |
| AgamP4_X | 4419921 | 4420537 |
| AgamP4_X | 4589258 | 4589802 |
| AgamP4_X | 4589843 | 4590358 |
| AgamP4_X | 4711668 | 4712485 |
| AgamP4_X | 4737916 | 4738470 |
| AgamP4_X | 4749416 | 4749922 |

|          |         |         |
|----------|---------|---------|
| AgamP4_X | 4816439 | 4817014 |
| AgamP4_X | 4820529 | 4821030 |
| AgamP4_X | 4963371 | 4963933 |
| AgamP4_X | 4998866 | 4999531 |
| AgamP4_X | 5006576 | 5007142 |
| AgamP4_X | 5037693 | 5038206 |
| AgamP4_X | 5080933 | 5081517 |
| AgamP4_X | 5247880 | 5248440 |
| AgamP4_X | 5316132 | 5316884 |
| AgamP4_X | 5332771 | 5333399 |
| AgamP4_X | 5405677 | 5406187 |
| AgamP4_X | 5407950 | 5408454 |
| AgamP4_X | 5408450 | 5408954 |
| AgamP4_X | 5426789 | 5427296 |
| AgamP4_X | 5488216 | 5488815 |
| AgamP4_X | 5700686 | 5701265 |
| AgamP4_X | 5729932 | 5730483 |
| AgamP4_X | 5777530 | 5778075 |
| AgamP4_X | 5817443 | 5817956 |
| AgamP4_X | 5874151 | 5874716 |
| AgamP4_X | 5925974 | 5926522 |
| AgamP4_X | 6015898 | 6016501 |
| AgamP4_X | 6027975 | 6028768 |
| AgamP4_X | 6073126 | 6073660 |
| AgamP4_X | 6094724 | 6095372 |
| AgamP4_X | 6124082 | 6124613 |
| AgamP4_X | 6311332 | 6311866 |
| AgamP4_X | 6336825 | 6337402 |
| AgamP4_X | 6404731 | 6405295 |
| AgamP4_X | 6535414 | 6535926 |
| AgamP4_X | 6582574 | 6583077 |
| AgamP4_X | 6609218 | 6609718 |
| AgamP4_X | 6734851 | 6735366 |
| AgamP4_X | 6768086 | 6768776 |
| AgamP4_X | 6784596 | 6785122 |
| AgamP4_X | 6848176 | 6848722 |
| AgamP4_X | 6884255 | 6884959 |
| AgamP4_X | 6884980 | 6885479 |
| AgamP4_X | 7260333 | 7260931 |
| AgamP4_X | 7464934 | 7465443 |
| AgamP4_X | 7488553 | 7489068 |
| AgamP4_X | 7507570 | 7508198 |
| AgamP4_X | 7562801 | 7563322 |
| AgamP4_X | 7643629 | 7644129 |
| AgamP4_X | 7698248 | 7698749 |
| AgamP4_X | 7705878 | 7706388 |
| AgamP4_X | 8130142 | 8130791 |
| AgamP4_X | 8190779 | 8191370 |
| AgamP4_X | 8393620 | 8394230 |
| AgamP4_X | 8568916 | 8569550 |

|          |          |          |
|----------|----------|----------|
| AgamP4_X | 8722436  | 8723095  |
| AgamP4_X | 9094118  | 9094703  |
| AgamP4_X | 9384292  | 9384943  |
| AgamP4_X | 9434019  | 9434559  |
| AgamP4_X | 9475651  | 9476160  |
| AgamP4_X | 9499018  | 9499537  |
| AgamP4_X | 9675659  | 9676197  |
| AgamP4_X | 9725780  | 9726384  |
| AgamP4_X | 9766851  | 9767402  |
| AgamP4_X | 9880490  | 9880995  |
| AgamP4_X | 9905642  | 9906283  |
| AgamP4_X | 9913997  | 9914511  |
| AgamP4_X | 9949427  | 9949930  |
| AgamP4_X | 9976707  | 9977414  |
| AgamP4_X | 9978135  | 9978648  |
| AgamP4_X | 9994652  | 9995227  |
| AgamP4_X | 10024801 | 10025317 |
| AgamP4_X | 10063969 | 10064499 |
| AgamP4_X | 10102108 | 10102627 |
| AgamP4_X | 10301018 | 10301689 |
| AgamP4_X | 10354242 | 10354883 |
| AgamP4_X | 10369854 | 10370450 |
| AgamP4_X | 10576993 | 10577492 |
| AgamP4_X | 10651851 | 10652418 |
| AgamP4_X | 10660865 | 10661415 |
| AgamP4_X | 10751533 | 10752032 |
| AgamP4_X | 10806898 | 10807438 |
| AgamP4_X | 10956360 | 10956878 |
| AgamP4_X | 10989219 | 10989727 |
| AgamP4_X | 10991869 | 10992446 |
| AgamP4_X | 10997992 | 10998500 |
| AgamP4_X | 11066452 | 11066954 |
| AgamP4_X | 11288224 | 11288754 |
| AgamP4_X | 11452457 | 11452982 |
| AgamP4_X | 11490600 | 11491245 |
| AgamP4_X | 11499113 | 11499646 |
| AgamP4_X | 11520950 | 11521488 |
| AgamP4_X | 11545622 | 11546240 |
| AgamP4_X | 11561770 | 11562275 |
| AgamP4_X | 11563274 | 11563907 |
| AgamP4_X | 11564735 | 11565270 |
| AgamP4_X | 11581535 | 11582059 |
| AgamP4_X | 11627480 | 11628010 |
| AgamP4_X | 11663646 | 11664183 |
| AgamP4_X | 11674927 | 11675439 |
| AgamP4_X | 11831843 | 11832374 |
| AgamP4_X | 12057912 | 12058420 |
| AgamP4_X | 12195060 | 12195577 |
| AgamP4_X | 12317126 | 12317684 |
| AgamP4_X | 12328834 | 12329373 |

|          |          |          |
|----------|----------|----------|
| AgamP4_X | 12389677 | 12390190 |
| AgamP4_X | 12423543 | 12424105 |
| AgamP4_X | 12428174 | 12428686 |
| AgamP4_X | 12480862 | 12481369 |
| AgamP4_X | 12520759 | 12521478 |
| AgamP4_X | 12564499 | 12565044 |
| AgamP4_X | 12697673 | 12698186 |
| AgamP4_X | 12727415 | 12727931 |
| AgamP4_X | 12846847 | 12847519 |
| AgamP4_X | 12868883 | 12869538 |
| AgamP4_X | 12906489 | 12906989 |
| AgamP4_X | 12956331 | 12956962 |
| AgamP4_X | 12958194 | 12958698 |
| AgamP4_X | 12978656 | 12979206 |
| AgamP4_X | 13248082 | 13248758 |
| AgamP4_X | 13249052 | 13249575 |
| AgamP4_X | 13274697 | 13275270 |
| AgamP4_X | 13312762 | 13313310 |
| AgamP4_X | 13565827 | 13566415 |
| AgamP4_X | 13579083 | 13579595 |
| AgamP4_X | 13594059 | 13594813 |
| AgamP4_X | 13690224 | 13690775 |
| AgamP4_X | 13753126 | 13753627 |
| AgamP4_X | 13848349 | 13848898 |
| AgamP4_X | 13851251 | 13851757 |
| AgamP4_X | 13886735 | 13887259 |
| AgamP4_X | 13934160 | 13934660 |
| AgamP4_X | 13983599 | 13984297 |
| AgamP4_X | 13992922 | 13993443 |
| AgamP4_X | 13994195 | 13994828 |
| AgamP4_X | 14182409 | 14182957 |
| AgamP4_X | 14274731 | 14275283 |
| AgamP4_X | 14290293 | 14290896 |
| AgamP4_X | 14374875 | 14375558 |
| AgamP4_X | 14568736 | 14569376 |
| AgamP4_X | 14645548 | 14646059 |
| AgamP4_X | 14689704 | 14690322 |
| AgamP4_X | 14788765 | 14789369 |
| AgamP4_X | 14825025 | 14825560 |
| AgamP4_X | 14955840 | 14956411 |
| AgamP4_X | 15084398 | 15084903 |
| AgamP4_X | 15285308 | 15285853 |
| AgamP4_X | 15348231 | 15348771 |
| AgamP4_X | 15610364 | 15610974 |
| AgamP4_X | 15650327 | 15650892 |
| AgamP4_X | 15690261 | 15690897 |
| AgamP4_X | 15824339 | 15824860 |
| AgamP4_X | 15904000 | 15904539 |
| AgamP4_X | 15915378 | 15915935 |
| AgamP4_X | 16130718 | 16131294 |

|          |          |          |
|----------|----------|----------|
| AgamP4_X | 16140383 | 16140900 |
| AgamP4_X | 16168415 | 16168950 |
| AgamP4_X | 16209429 | 16209987 |
| AgamP4_X | 16354017 | 16354586 |
| AgamP4_X | 16587101 | 16587719 |
| AgamP4_X | 16669751 | 16670318 |
| AgamP4_X | 16754145 | 16754800 |
| AgamP4_X | 16755748 | 16756287 |
| AgamP4_X | 16808311 | 16808815 |
| AgamP4_X | 16843384 | 16843958 |
| AgamP4_X | 16881366 | 16881944 |
| AgamP4_X | 16920540 | 16921196 |
| AgamP4_X | 17017851 | 17018355 |
| AgamP4_X | 17105358 | 17105864 |
| AgamP4_X | 17174689 | 17175255 |
| AgamP4_X | 17323811 | 17324324 |
| AgamP4_X | 17384708 | 17385273 |
| AgamP4_X | 17510936 | 17511441 |
| AgamP4_X | 17536970 | 17537480 |
| AgamP4_X | 17564264 | 17564809 |
| AgamP4_X | 17585822 | 17586489 |
| AgamP4_X | 17623438 | 17623970 |
| AgamP4_X | 17683286 | 17683859 |
| AgamP4_X | 17807012 | 17807728 |
| AgamP4_X | 17870785 | 17871306 |
| AgamP4_X | 17894959 | 17895503 |
| AgamP4_X | 17994531 | 17995058 |
| AgamP4_X | 18111006 | 18111515 |
| AgamP4_X | 18115581 | 18116114 |
| AgamP4_X | 18240134 | 18240745 |
| AgamP4_X | 18258374 | 18258939 |
| AgamP4_X | 18425940 | 18426441 |
| AgamP4_X | 18472314 | 18472822 |
| AgamP4_X | 18569550 | 18570109 |
| AgamP4_X | 18579158 | 18579660 |
| AgamP4_X | 18598074 | 18598581 |
| AgamP4_X | 18646922 | 18647440 |
| AgamP4_X | 18654775 | 18655291 |
| AgamP4_X | 18856133 | 18856643 |
| AgamP4_X | 18858299 | 18858804 |
| AgamP4_X | 18898254 | 18898776 |
| AgamP4_X | 18912279 | 18912783 |
| AgamP4_X | 18949623 | 18950219 |
| AgamP4_X | 19006824 | 19007365 |
| AgamP4_X | 19084685 | 19085272 |
| AgamP4_X | 19201460 | 19201984 |
| AgamP4_X | 19227480 | 19228028 |
| AgamP4_X | 19240317 | 19240867 |
| AgamP4_X | 19250104 | 19250608 |
| AgamP4_X | 19270532 | 19271051 |

|          |          |          |
|----------|----------|----------|
| AgamP4_X | 19378064 | 19378669 |
| AgamP4_X | 19415692 | 19416299 |
| AgamP4_X | 19537443 | 19538169 |
| AgamP4_X | 19548676 | 19549412 |
| AgamP4_X | 19634914 | 19635482 |
| AgamP4_X | 19640085 | 19640692 |
| AgamP4_X | 19744415 | 19744959 |
| AgamP4_X | 19856014 | 19856540 |
| AgamP4_X | 20294850 | 20295447 |
| AgamP4_X | 20478462 | 20479014 |
| AgamP4_X | 20702875 | 20703426 |
| AgamP4_X | 20727764 | 20728288 |
| AgamP4_X | 20928658 | 20929200 |
| AgamP4_X | 21226841 | 21227518 |
| AgamP4_X | 21555289 | 21555964 |
| AgamP4_X | 22681863 | 22682369 |
| AgamP4_X | 22880840 | 22881414 |
| AgamP4_X | 23356198 | 23356699 |
| AgamP4_X | 23662164 | 23662666 |
| AgamP4_X | 23787051 | 23787566 |
| AgamP4_X | 23793167 | 23793677 |
| AgamP4_X | 24036430 | 24036968 |
| AgamP4_X | 24110619 | 24111223 |
| AgamP4_X | 24125531 | 24126066 |
| AgamP4_X | 24300759 | 24301263 |
| AgamP4_X | 24366962 | 24367641 |
| AgamP4_X | 24384068 | 24384581 |

**Table S2. All 329 differential interactions between 2La and 2L+ cells spanning a 2La inversion breakpoint**

| chromosom | start1   | end1       | chromosom | start2   | end2     | Distance b | logFC   | logCPM  | p.value  | p.adj    | reason for inclusion/exclusion                                                                           |
|-----------|----------|------------|-----------|----------|----------|------------|---------|---------|----------|----------|----------------------------------------------------------------------------------------------------------|
| AgamP4_2  | 150000   | 154999     | AgamP4_2  | 37520000 | 37524999 | 7474       | -2.5109 | 12.1049 | 0.00679  | 0.0106   | no_promoter_or_enhancer                                                                                  |
| AgamP4_2  | 505000   | 509999     | AgamP4_2  | 22495000 | 22499999 | 4398       | 4.0758  | 10.8452 | 0.0313   | 0.0368   | no_promoter_or_enhancer                                                                                  |
| AgamP4_2  | 505000   | 509999     | AgamP4_2  | 22500000 | 22504999 | 4399       | 4.8097  | 11.1596 | 0.00195  | 0.00336  | no_promoter                                                                                              |
| AgamP4_2  | 505000   | 509999     | AgamP4_2  | 22505000 | 22509999 | 4400       | 4.7772  | 11.1445 | 0.00195  | 0.00336  | no_promoter_or_enhancer                                                                                  |
| AgamP4_2  | 505000   | 509999     | AgamP4_2  | 22525000 | 22529999 | 4404       | 6.6181  | 12.3126 | 1.47E-11 | 1.27E-10 | no_promoter_or_enhancer                                                                                  |
| AgamP4_2  | 505000   | 509999     | AgamP4_2  | 22530000 | 22534999 | 4405       | 6.6792  | 12.3613 | 3.68E-12 | 3.61E-11 | no_promoter                                                                                              |
| AgamP4_2  | 505000   | 509999     | AgamP4_2  | 22535000 | 22539999 | 4406       | 4.2533  | 10.9122 | 0.0156   | 0.0206   | no_promoter_or_enhancer                                                                                  |
| AgamP4_2  | 1980000  | 1984999    | AgamP4_2  | 32360000 | 32364999 | 6076       | -9.673  | 14.9026 | 2.02E-46 | 1.43E-44 | no_enhancer                                                                                              |
| AgamP4_2  | 1980000  | 1984999    | AgamP4_2  | 32365000 | 32369999 | 6077       | -9.1293 | 14.3763 | 1.22E-28 | 3.46E-27 | no_enhancer                                                                                              |
| AgamP4_2  | 6325000  | 6329999    | AgamP4_2  | 23560000 | 23564999 | 3447       | 5.3542  | 11.4525 | 6.11E-05 | 0.000131 | no_enhancer                                                                                              |
| AgamP4_2  | 6620000  | 6624999    | AgamP4_2  | 47080000 | 47084999 | 8092       | 5.3036  | 11.4238 | 6.11E-05 | 0.000131 | no_promoter_or_enhancer                                                                                  |
| AgamP4_2  | 6625000  | 6629999    | AgamP4_2  | 47080000 | 47084999 | 8091       | 5.8036  | 11.7319 | 9.57E-07 | 3.18E-06 | no_promoter_or_enhancer                                                                                  |
| AgamP4_2  | 6630000  | 6634999    | AgamP4_2  | 47080000 | 47084999 | 8090       | 4.4689  | 11.0023 | 0.00782  | 0.0114   | no_promoter                                                                                              |
| AgamP4_2  | 7015000  | 7019999    | AgamP4_2  | 25430000 | 25434999 | 3683       | 4.23    | 10.904  | 0.0156   | 0.0206   | no_promoter_or_enhancer                                                                                  |
| AgamP4_2  | 7015000  | 7019999    | AgamP4_2  | 25435000 | 25439999 | 3684       | 5.6394  | 11.6267 | 3.83E-06 | 1.11E-05 | no_promoter_or_enhancer                                                                                  |
| AgamP4_2  | 7015000  | 7019999    | AgamP4_2  | 25440000 | 25444999 | 3685       | 6.9828  | 12.5996 | 7.24E-15 | 9.79E-14 | no_promoter_or_enhancer                                                                                  |
| AgamP4_2  | 7015000  | 7019999    | AgamP4_2  | 25445000 | 25449999 | 3686       | 5.0438  | 11.2795 | 0.000489 | 0.000932 | no_enhancer                                                                                              |
| AgamP4_2  | 7015000  | 7019999    | AgamP4_2  | 40890000 | 40894999 | 6775       | 4.5977  | 11.0591 | 0.00391  | 0.00617  | no_promoter_or_enhancer                                                                                  |
| AgamP4_2  | 7305000  | 7309999    | AgamP4_2  | 25850000 | 25854999 | 3709       | -3.569  | 13.379  | 1.04E-14 | 1.35E-13 | no_enhancer                                                                                              |
| AgamP4_2  | 9170000  | 9174999    | AgamP4_2  | 24275000 | 24279999 | 3021       | 4.3518  | 10.9524 | 0.0156   | 0.0206   | no_promoter_or_enhancer                                                                                  |
| AgamP4_2  | 9910000  | 9914999    | AgamP4_2  | 26750000 | 26754999 | 3368       | -8.5346 | 13.8083 | 6.28E-28 | 1.62E-26 | no_enhancer                                                                                              |
| AgamP4_2  | 17420000 | 17424999   | AgamP4_2  | 36135000 | 36139999 | 3743       | -8.7897 | 14.0496 | 1.66E-37 | 6.75E-36 | no_enhancer                                                                                              |
| AgamP4_2  | 20260000 | 20264999   | AgamP4_2  | 41945000 | 41949999 | 4337       | 4.2618  | 10.9162 | 0.0156   | 0.0206   | no_promoter_or_enhancer                                                                                  |
| AgamP4_2  | 20385000 | 20389999   | AgamP4_2  | 20540000 | 20544999 | 31         | -6.2358 | 4.8708  | 1.73E-08 | 4.88E-06 | no_enhancer                                                                                              |
| AgamP4_2  | 20395000 | 20399999   | AgamP4_2  | 20545000 | 20549999 | 30         | -4.1274 | 4.8608  | 5.08E-07 | 7.30E-05 | no_enhancer                                                                                              |
| AgamP4_2  | 20405000 | 20409999   | AgamP4_2  | 20530000 | 20534999 | 25         | -6.4282 | 4.4595  | 5.46E-10 | 1.47E-07 | no_promoter_or_enhancer                                                                                  |
| AgamP4_2  | 20405000 | 20409999   | AgamP4_2  | 20540000 | 20544999 | 27         | -3.3293 | 4.3893  | 1.82E-06 | 0.000132 | no_promoter_or_enhancer                                                                                  |
| AgamP4_2  | 20420000 | 20424999   | AgamP4_2  | 20525000 | 20529999 | 21         | -6.1928 | 4.2911  | 3.27E-08 | 4.62E-06 | valid_nonDEG_promoter-enhancer_pair_but_not_valid_DEG_promoter-enhancer_pair                             |
| AgamP4_2  | 20420000 | 20424999   | AgamP4_2  | 20545000 | 20549999 | 25         | -6.4074 | 4.4443  | 1.39E-09 | 3.17E-07 | valid_DEG_promoter-enhancer_pair_but_promoter_not_in_valid_DEG_promoter-enhancer_pair_in_2La_interaction |
| AgamP4_2  | 20425000 | 20429999   | AgamP4_2  | 20525000 | 20529999 | 20         | -6.4987 | 4.0277  | 3.73E-10 | 5.63E-08 | no_enhancer                                                                                              |
| AgamP4_2  | 20425000 | 20429999   | AgamP4_2  | 20570000 | 20574999 | 29         | -6.6508 | 5.1755  | 1.70E-11 | 1.69E-08 | valid_nonDEG_promoter-enhancer_pair_but_not_valid_DEG_promoter-enhancer_pair                             |
| AgamP4_2  | 20430000 | 20434999   | AgamP4_2  | 20530000 | 20534999 | 20         | -6.2816 | 3.8701  | 1.68E-08 | 1.63E-06 | no_promoter_or_enhancer                                                                                  |
| AgamP4_2  | 20430000 | 20434999   | AgamP4_2  | 20545000 | 20549999 | 23         | -6.2492 | 4.3307  | 8.31E-09 | 1.49E-06 | no_enhancer                                                                                              |
| AgamP4_2  | 20435000 | 20439999   | AgamP4_2  | 20540000 | 20544999 | 21         | -6.4179 | 4.452   | 1.44E-09 | 3.24E-07 | no_promoter_or_enhancer                                                                                  |
| AgamP4_2  | 20450000 | 20454999   | AgamP4_2  | 20530000 | 20534999 | 16         | -4.2681 | 3.9107  | 7.52E-08 | 6.17E-06 | no_enhancer                                                                                              |
| AgamP4_2  | 20455000 | 20459999   | AgamP4_2  | 20525000 | 20529999 | 14         | -6.436  | 3.5274  | 7.54E-10 | 6.57E-08 | no_enhancer                                                                                              |
| AgamP4_2  | 20470000 | 20474999   | AgamP4_2  | 20525000 | 20529999 | 11         | -6.3222 | 3.445   | 6.05E-09 | 4.08E-07 | no_enhancer                                                                                              |
| AgamP4_2  | 20475000 | 20479999   | AgamP4_2  | 20530000 | 20534999 | 11         | -6.3183 | 3.4423  | 5.60E-09 | 3.86E-07 | no_promoter                                                                                              |
| AgamP4_2  | 20480000 | 20484999   | AgamP4_2  | 20525000 | 20529999 | 9          | -6.506  | 3.1112  | 3.53E-10 | 1.56E-08 | valid_nonDEG_promoter-enhancer_pair_but_not_valid_DEG_promoter-enhancer_pair                             |
| AgamP4_2  | 20480000 | 20484999   | AgamP4_2  | 20530000 | 20534999 | 10         | -6.4324 | 3.5248  | 7.45E-10 | 6.52E-08 | no_promoter                                                                                              |
| AgamP4_2  | 20480000 | 20484999   | AgamP4_2  | 20535000 | 20539999 | 11         | -6.2607 | 3.4013  | 1.13E-08 | 7.08E-07 | no_promoter                                                                                              |
| AgamP4_2  | 20480000 | 20484999   | AgamP4_2  | 20540000 | 20544999 | 12         | -6.5924 | 3.6435  | 5.57E-11 | 6.29E-09 | no_promoter                                                                                              |
| AgamP4_2  | 20480000 | 20484999   | AgamP4_2  | 20545000 | 20549999 | 13         | -6.5244 | 3.5926  | 1.95E-10 | 1.95E-08 | valid_DEG_promoter-enhancer_pair_but_enhancer_not_in_valid_DEG_promoter-enhancer_pair_in_2La_interaction |
| AgamP4_2  | 20480000 | 20484999   | AgamP4_2  | 42140000 | 42144999 | 4332       | 4.3085  | 10.9345 | 0.0156   | 0.0206   | no_promoter                                                                                              |
| AgamP4_2  | 20480000 | 20484999   | AgamP4_2  | 42150000 | 42154999 | 4334       | 4.0931  | 10.8516 | 0.0313   | 0.0368   | no_promoter                                                                                              |
| AgamP4_2  | 20485000 | 20489999   | AgamP4_2  | 20525000 | 20529999 | 8          | -7.0977 | 3.5715  | 4.57E-15 | 4.76E-13 | valid_nonDEG_promoter-enhancer_pair_but_not_valid_DEG_promoter-enhancer_pair                             |
| AgamP4_2  | 20485000 | 20489999   | AgamP4_2  | 20530000 | 20534999 | 9          | -6.8794 | 3.3968  | 4.49E-13 | 3.50E-11 | no_promoter                                                                                              |
| AgamP4_2  | 20485000 | 20489999   | AgamP4_2  | 20535000 | 20539999 | 10         | -6.4008 | 3.5018  | 1.52E-09 | 1.21E-07 | no_promoter                                                                                              |
| AgamP4_2  | 20485000 | 20489999   | AgamP4_2  | 20540000 | 20544999 | 11         | -4.5576 | 3.741   | 2.65E-10 | 2.56E-08 | no_promoter                                                                                              |
| AgamP4_2  | 20485000 | 20489999   | AgamP4_2  | 20545000 | 20549999 | 12         | -6.9552 | 3.9246  | 6.78E-14 | 1.31E-11 | valid_DEG_promoter-enhancer_pair_and_one_of_13_final_interactions                                        |
| AgamP4_2  | 20485000 | 20489999   | AgamP4_2  | 20565000 | 20569999 | 16         | -6.5826 | 4.0903  | 9.69E-11 | 1.68E-08 | no_promoter                                                                                              |
| AgamP4_2  | 20485000 | 20489999   | AgamP4_2  | 20570000 | 20574999 | 17         | -6.3407 | 3.9123  | 3.63E-09 | 4.23E-07 | no_promoter                                                                                              |
| AgamP4_2  | 20485000 | 20489999   | AgamP4_2  | 42145000 | 42149999 | 4332       | 3.986   | 10.8124 | 0.0313   | 0.0368   | valid_nonDEG_promoter-enhancer_pair_but_not_valid_DEG_promoter-enhancer_pair                             |
| AgamP4_2  | 20485000 | 20489999   | AgamP4_2  | 42160000 | 42164999 | 4335       | 3.9797  | 10.8099 | 0.0313   | 0.0368   | valid_DEG_promoter-enhancer_pair_and_one_of_13_final_interactions                                        |
| AgamP4_2  | 20490000 | 20494999   | AgamP4_2  | 20525000 | 20529999 | 7          | -4.9573 | 3.625   | 3.15E-14 | 2.94E-12 | valid_nonDEG_promoter-enhancer_pair_but_not_valid_DEG_promoter-enhancer_pair                             |
| AgamP4_2  | 20490000 | 20494999   | AgamP4_2  | 20530000 | 20534999 | 8          | -4.9178 | 3.5963  | 1.38E-13 | 1.17E-11 | promoter_and_enhancer_within_same_anchor                                                                 |
| AgamP4_2  | 20490000 | 20494999   | AgamP4_2  | 20535000 | 20539999 | 9          | -6.3172 | 2.9739  | 5.17E-09 | 1.76E-07 | promoter_and_enhancer_within_same_anchor                                                                 |
| AgamP4_2  | 20490000 | 20494999   | AgamP4_2  | 20540000 | 20544999 | 10         | -6.8838 | 3.868   | 2.98E-13 | 5.03E-11 | promoter_and_enhancer_within_same_anchor                                                                 |
| AgamP4_2  | 20490000 | 20494999   | AgamP4_2  | 20545000 | 20549999 | 11         | -6.7122 | 3.7345  | 7.39E-12 | 9.59E-10 | valid_DEG_promoter-enhancer_pair_and_one_of_13_final_interactions                                        |
| AgamP4_2  | 20490000 | 20494999   | AgamP4_2  | 20560000 | 20564999 | 14         | -6.5357 | 3.6011  | 2.28E-10 | 2.25E-08 | valid_nonDEG_promoter-enhancer_pair_but_not_valid_DEG_promoter-enhancer_pair                             |
| AgamP4_2  | 20490000 | 20494999   | AgamP4_2  | 20565000 | 20569999 | 15         | -6.5126 | 4.038   | 1.99E-10 | 3.19E-08 | promoter_and_enhancer_within_same_anchor                                                                 |
| AgamP4_2  | 20490000 | 20494999   | AgamP4_2  | 42155000 | 42159999 | 4333       | 4.2123  | 10.8959 | 0.0156   | 0.0206   | promoter_and_enhancer_within_same_anchor                                                                 |
| AgamP4_2  | 20495000 | 20499999   | AgamP4_2  | 20525000 | 20529999 | 6          | -7.6858 | 4.066   | 2.85E-22 | 6.28E-20 | no_enhancer                                                                                              |
| AgamP4_2  | 20495000 | 20499999   | AgamP4_2  | 20530000 | 20534999 | 7          | -5.1859 | 3.8109  | 1.91E-15 | 2.14E-13 | no_enhancer                                                                                              |
| AgamP4_2  | 20495000 | 20499999   | AgamP4_2  | 20535000 | 20539999 | 8          | -6.4343 | 3.0584  | 6.88E-10 | 2.92E-08 | no_enhancer                                                                                              |
| AgamP4_2  | 20495000 | 20499999   | AgamP4_2  | 20540000 | 20544999 | 9          | -6.9889 | 3.4838  | 4.05E-14 | 3.73E-12 | no_enhancer                                                                                              |
| AgamP4_2  | 20495000 | 20499999   | AgamP4_2  | 20545000 | 20549999 | 10         | -7.2581 | 4.1708  | 5.38E-17 | 1.56E-14 | no_enhancer                                                                                              |
| AgamP4_2  | 20495000 | 20499999   | AgamP4_2  | 20555000 | 20559999 | 12         | -6.3214 | 3.4446  | 5.81E-09 | 3.95E-07 | valid_DEG_promoter-enhancer_pair_but_promoter_not_in_valid_DEG_promoter-enhancer_pair_in_2La_interaction |
| AgamP4_2  | 20495000 | 20499999   | AgamP4_2  | 42130000 | 42134999 | 4327       | 4.2944  | 10.9295 | 0.0156   | 0.0206   | no_enhancer                                                                                              |
| AgamP4_2  | 20495000 | 20499999   | AgamP4_2  | 42140000 | 42144999 | 4329       | 4.6541  | 11.0852 | 0.00391  | 0.00617  | no_enhancer                                                                                              |
| AgamP4_2  | 20495000 | 20499999   | AgamP4_2  | 42145000 | 42149999 | 4330       | 4.0688  | 10.8417 | 0.0313   | 0.0368   | no_enhancer                                                                                              |
| AgamP4_2  | 20495000 | 20499999   | AgamP4_2  | 42150000 | 42154999 | 4331       | 4.1319  | 10.8645 | 0.0313   | 0.0368   | no_enhancer                                                                                              |
| AgamP4_2  | 20495000 | 20499999   | AgamP4_2  | 42160000 | 42164999 | 4333       | 5.2975  | 11.4201 | 6.11E-05 | 0.000131 | no_enhancer                                                                                              |
| AgamP4_2  | 20500000 | 20504999   | AgamP4_2  | 20525000 | 20529999 | 5          | -8.765  | 4.436   | 1.04E-45 | 3.90E-43 | no_enhancer                                                                                              |
| AgamP4_2  | 20500000 | 20504999   | AgamP4_2  | 20530000 | 20534999 | 6          | -7.734  | 4.1078  | 8.31E-23 | 1.95E-20 | no_enhancer                                                                                              |
| AgamP4_2  | 20500000 | 20504999   | AgamP4_2  | 20535000 | 20539999 | 7          | -4.7958 | 3.3681  | 3.35E-11 | 1.88E-09 | no_enhancer                                                                                              |
| AgamP4_2  | 20500000 | 20504999   | AgamP4_2  | 20540000 | 20544999 | 8          | -5.1021 | 3.7444  | 1.17E-15 | 1.36E-13 | no_enhancer                                                                                              |
| AgamP4_2  | 20500000 | 20504999   | AgamP4_2  | 20545000 | 20549999 | 9          | -8.0107 | 4.3519  | 6.88E-28 | 2.32E-25 | no_enhancer                                                                                              |
| AgamP4_2  | 20500000 | 20504999   | AgamP4_2  | 20555000 | 20559999 | 11         | -6.7212 | 3.7414  | 7.37E-12 | 9.59E-10 | valid_nonDEG_promoter-enhancer_pair_but_not_valid_DEG_promoter-enhancer_pair                             |
| AgamP4_2  | 20500000 | 20504999   | AgamP4_2  | 20560000 | 20564999 | 12         | -7.1263 | 4.0625  | 1.48E-15 | 3.77E-13 | valid_nonDEG_promoter-enhancer_pair_but_not_valid_DEG_promoter-enhancer_pair                             |
| AgamP4_2  | 20500000 | 20504999   | AgamP4_2  | 20565000 | 20569999 | 13         | -6.8323 | 3.8275  | 9.66E-13 | 1.47E-10 | no_enhancer                                                                                              |
| AgamP4_2  | 20500000 | 20504999   | AgamP4_2  | 20570000 | 20574999 | 14         | -4.5448 | 3.6508  | 1.99E-09 | 1.54E-07 | valid_nonDEG_promoter-enhancer_pair_but_not_valid_DEG_promoter-enhancer_pair                             |
| AgamP4_2  | 20500000 | 20504999   | AgamP4_2  | 42125000 | 42129999 | 4325       | 4.2601  | 10.9156 | 0.0156   | 0.0206   | no_enhancer                                                                                              |
| AgamP4_2  | 20500000 | 20504999</ |           |          |          |            |         |         |          |          |                                                                                                          |

|          |          |          |          |          |          |      |          |         |           |           |                                                                              |
|----------|----------|----------|----------|----------|----------|------|----------|---------|-----------|-----------|------------------------------------------------------------------------------|
| AgamP4_2 | 20505000 | 20509999 | AgamP4_2 | 20570000 | 20574999 | 13   | -6.4618  | 3.5463  | 7.58E-10  | 6.58E-08  | valid_nonDEG_promoter-enhancer_pair_but_not_valid_DEG_promoter-enhancer_pair |
| AgamP4_2 | 20505000 | 20509999 | AgamP4_2 | 42125000 | 42129999 | 4324 | 4.3241   | 10.941  | 0.0156    | 0.0206    | no_enhancer                                                                  |
| AgamP4_2 | 20505000 | 20509999 | AgamP4_2 | 42130000 | 42134999 | 4325 | 6.0096   | 11.8692 | 1.20E-07  | 4.47E-07  | no_enhancer                                                                  |
| AgamP4_2 | 20505000 | 20509999 | AgamP4_2 | 42135000 | 42139999 | 4326 | 5.5052   | 11.5427 | 1.53E-05  | 3.71E-05  | no_enhancer                                                                  |
| AgamP4_2 | 20505000 | 20509999 | AgamP4_2 | 42140000 | 42144999 | 4327 | 5.3505   | 11.4505 | 6.11E-05  | 0.000131  | no_enhancer                                                                  |
| AgamP4_2 | 20505000 | 20509999 | AgamP4_2 | 42145000 | 42149999 | 4328 | 5.5621   | 11.5727 | 5.29E-05  | 0.000117  | no_enhancer                                                                  |
| AgamP4_2 | 20505000 | 20509999 | AgamP4_2 | 42150000 | 42154999 | 4329 | 5.4427   | 11.5052 | 3.06E-05  | 7.00E-05  | no_enhancer                                                                  |
| AgamP4_2 | 20505000 | 20509999 | AgamP4_2 | 42155000 | 42159999 | 4330 | 5.1712   | 11.3486 | 0.000313  | 0.000618  | no_enhancer                                                                  |
| AgamP4_2 | 20505000 | 20509999 | AgamP4_2 | 42160000 | 42164999 | 4331 | 6.6628   | 12.3471 | 7.36E-12  | 6.77E-11  | no_enhancer                                                                  |
| AgamP4_2 | 20510000 | 20514999 | AgamP4_2 | 20525000 | 20529999 | 3    | -8.9911  | 4.6484  | 1.31E-52  | 5.98E-50  | no_enhancer                                                                  |
| AgamP4_2 | 20510000 | 20514999 | AgamP4_2 | 20530000 | 20534999 | 4    | -8.2842  | 3.9925  | 2.93E-32  | 5.11E-30  | no_promoter_or_enhancer                                                      |
| AgamP4_2 | 20510000 | 20514999 | AgamP4_2 | 20535000 | 20539999 | 5    | -7.7765  | 3.5391  | 8.61E-24  | 9.42E-22  | no_promoter_or_enhancer                                                      |
| AgamP4_2 | 20510000 | 20514999 | AgamP4_2 | 20540000 | 20544999 | 6    | -8.0792  | 4.4132  | 4.97E-29  | 1.90E-26  | no_promoter_or_enhancer                                                      |
| AgamP4_2 | 20510000 | 20514999 | AgamP4_2 | 20545000 | 20549999 | 7    | -8.1261  | 4.4554  | 3.90E-30  | 1.71E-27  | no_enhancer                                                                  |
| AgamP4_2 | 20510000 | 20514999 | AgamP4_2 | 20555000 | 20559999 | 9    | -4.8173  | 3.5161  | 7.82E-13  | 5.86E-11  | promoter_and_enhancer_within_same_anchor                                     |
| AgamP4_2 | 20510000 | 20514999 | AgamP4_2 | 20560000 | 20564999 | 10   | -6.7996  | 3.8021  | 2.13E-12  | 3.08E-10  | no_promoter                                                                  |
| AgamP4_2 | 20510000 | 20514999 | AgamP4_2 | 20565000 | 20569999 | 11   | -4.7386  | 3.9176  | 6.21E-12  | 8.25E-10  | no_promoter_or_enhancer                                                      |
| AgamP4_2 | 20510000 | 20514999 | AgamP4_2 | 20570000 | 20574999 | 12   | -4.1837  | 3.5109  | 4.42E-08  | 2.30E-06  | no_promoter                                                                  |
| AgamP4_2 | 20510000 | 20514999 | AgamP4_2 | 20575000 | 20579999 | 13   | -4.518   | 3.7071  | 9.77E-10  | 8.26E-08  | no_promoter_or_enhancer                                                      |
| AgamP4_2 | 20510000 | 20514999 | AgamP4_2 | 42130000 | 42134999 | 4324 | 5.5453   | 11.5678 | 1.53E-05  | 3.71E-05  | no_promoter_or_enhancer                                                      |
| AgamP4_2 | 20510000 | 20514999 | AgamP4_2 | 42135000 | 42139999 | 4325 | 5.6504   | 11.6332 | 3.83E-06  | 1.11E-05  | no_promoter_or_enhancer                                                      |
| AgamP4_2 | 20510000 | 20514999 | AgamP4_2 | 42145000 | 42149999 | 4327 | 5.4727   | 11.5223 | 3.06E-05  | 7.00E-05  | no_enhancer                                                                  |
| AgamP4_2 | 20510000 | 20514999 | AgamP4_2 | 42150000 | 42154999 | 4328 | 4.8365   | 11.1722 | 0.00195   | 0.00336   | no_promoter_or_enhancer                                                      |
| AgamP4_2 | 20510000 | 20514999 | AgamP4_2 | 42160000 | 42164999 | 4330 | 6.5426   | 12.2546 | 5.88E-11  | 4.39E-10  | no_enhancer                                                                  |
| AgamP4_2 | 20515000 | 20519999 | AgamP4_2 | 20525000 | 20529999 | 2    | -6.9966  | 1.5787  | 4.73E-14  | 5.23E-13  | no_enhancer                                                                  |
| AgamP4_2 | 20515000 | 20519999 | AgamP4_2 | 20530000 | 20534999 | 3    | -6.2509  | 2.3208  | 1.22E-08  | 1.75E-07  | no_promoter_or_enhancer                                                      |
| AgamP4_2 | 20515000 | 20519999 | AgamP4_2 | 20540000 | 20544999 | 5    | -6.3963  | 2.4247  | 1.60E-09  | 2.72E-08  | no_promoter_or_enhancer                                                      |
| AgamP4_2 | 20515000 | 20519999 | AgamP4_2 | 42160000 | 42164999 | 4329 | 4.7705   | 11.1396 | 0.00195   | 0.00336   | no_enhancer                                                                  |
| AgamP4_2 | 20520000 | 20524999 | AgamP4_2 | 20525000 | 20529999 | 1    | -10.6589 | 4.9579  | 1.28E-143 | 1.48E-140 | valid_nonDEG_promoter-enhancer_pair_but_not_valid_DEG_promoter-enhancer_pair |
| AgamP4_2 | 20520000 | 20524999 | AgamP4_2 | 20530000 | 20534999 | 2    | -7.1553  | 3.576   | 3.39E-58  | 5.44E-56  | promoter_and_enhancer_within_same_anchor                                     |
| AgamP4_2 | 20520000 | 20524999 | AgamP4_2 | 20535000 | 20539999 | 3    | -8.3043  | 4.0107  | 9.61E-34  | 1.87E-31  | promoter_and_enhancer_within_same_anchor                                     |
| AgamP4_2 | 20520000 | 20524999 | AgamP4_2 | 20540000 | 20544999 | 4    | -8.6713  | 4.3486  | 3.01E-42  | 8.91E-40  | promoter_and_enhancer_within_same_anchor                                     |
| AgamP4_2 | 20520000 | 20524999 | AgamP4_2 | 20545000 | 20549999 | 5    | -5.8974  | 4.4535  | 7.65E-42  | 2.21E-39  | valid_DEG_promoter-enhancer_pair_and_one_of_13_final_interactions            |
| AgamP4_2 | 20520000 | 20524999 | AgamP4_2 | 20555000 | 20559999 | 7    | -7.2753  | 3.7172  | 4.87E-17  | 6.93E-15  | valid_nonDEG_promoter-enhancer_pair_but_not_valid_DEG_promoter-enhancer_pair |
| AgamP4_2 | 20520000 | 20524999 | AgamP4_2 | 20560000 | 20564999 | 8    | -6.84    | 3.3658  | 1.04E-12  | 7.59E-11  | valid_nonDEG_promoter-enhancer_pair_but_not_valid_DEG_promoter-enhancer_pair |
| AgamP4_2 | 20520000 | 20524999 | AgamP4_2 | 20565000 | 20569999 | 9    | -7.0712  | 3.5499  | 4.88E-15  | 5.06E-13  | promoter_and_enhancer_within_same_anchor                                     |
| AgamP4_2 | 20520000 | 20524999 | AgamP4_2 | 20570000 | 20574999 | 10   | -6.9485  | 3.9192  | 6.72E-14  | 1.31E-11  | valid_nonDEG_promoter-enhancer_pair_but_not_valid_DEG_promoter-enhancer_pair |
| AgamP4_2 | 20520000 | 20524999 | AgamP4_2 | 20575000 | 20579999 | 11   | -6.5199  | 3.5892  | 2.00E-10  | 1.99E-08  | promoter_and_enhancer_within_same_anchor                                     |
| AgamP4_2 | 20520000 | 20524999 | AgamP4_2 | 20580000 | 20584999 | 12   | -6.4422  | 3.5319  | 7.42E-10  | 6.52E-08  | promoter_and_enhancer_within_same_anchor                                     |
| AgamP4_2 | 20520000 | 20524999 | AgamP4_2 | 42125000 | 42129999 | 4321 | 4.5897   | 11.0551 | 0.00391   | 0.00617   | valid_DEG_promoter-enhancer_pair_and_one_of_13_final_interactions            |
| AgamP4_2 | 20520000 | 20524999 | AgamP4_2 | 42130000 | 42134999 | 4322 | 1.5052   | 11.9935 | 0.0377    | 0.0442    | promoter_and_enhancer_within_same_anchor                                     |
| AgamP4_2 | 20520000 | 20524999 | AgamP4_2 | 42135000 | 42139999 | 4323 | 6.0372   | 11.8898 | 5.99E-08  | 2.33E-07  | promoter_and_enhancer_within_same_anchor                                     |
| AgamP4_2 | 20520000 | 20524999 | AgamP4_2 | 42140000 | 42144999 | 4324 | 5.6216   | 11.6156 | 7.65E-06  | 2.05E-05  | promoter_and_enhancer_within_same_anchor                                     |
| AgamP4_2 | 20520000 | 20524999 | AgamP4_2 | 42145000 | 42149999 | 4325 | 5.2426   | 11.3877 | 0.000122  | 0.000252  | valid_nonDEG_promoter-enhancer_pair_but_not_valid_DEG_promoter-enhancer_pair |
| AgamP4_2 | 20520000 | 20524999 | AgamP4_2 | 42150000 | 42154999 | 4326 | 5.0174   | 11.2655 | 0.000489  | 0.000932  | promoter_and_enhancer_within_same_anchor                                     |
| AgamP4_2 | 20520000 | 20524999 | AgamP4_2 | 42155000 | 42159999 | 4327 | 5.5795   | 11.588  | 7.65E-06  | 2.05E-05  | promoter_and_enhancer_within_same_anchor                                     |
| AgamP4_2 | 20520000 | 20524999 | AgamP4_2 | 42160000 | 42164999 | 4328 | 7.6919   | 13.1943 | 4.88E-21  | 1.07E-19  | valid_DEG_promoter-enhancer_pair_and_one_of_13_final_interactions            |
| AgamP4_2 | 20525000 | 20529999 | AgamP4_2 | 20530000 | 20534999 | 1    | -1.2377  | 6.2164  | 3.18E-30  | 1.40E-28  | no_enhancer                                                                  |
| AgamP4_2 | 20525000 | 20529999 | AgamP4_2 | 20535000 | 20539999 | 2    | -1.3083  | 4.6051  | 2.56E-15  | 3.19E-14  | no_enhancer                                                                  |
| AgamP4_2 | 20525000 | 20529999 | AgamP4_2 | 20540000 | 20544999 | 3    | -1.1265  | 6.0202  | 9.22E-13  | 2.87E-11  | no_enhancer                                                                  |
| AgamP4_2 | 20525000 | 20529999 | AgamP4_2 | 20565000 | 20569999 | 8    | -1.7014  | 4.2272  | 1.39E-06  | 2.35E-05  | no_enhancer                                                                  |
| AgamP4_2 | 20525000 | 20529999 | AgamP4_2 | 20570000 | 20574999 | 9    | -1.0428  | 4.1417  | 0.00339   | 0.0169    | valid_nonDEG_promoter-enhancer_pair_but_not_valid_DEG_promoter-enhancer_pair |
| AgamP4_2 | 20525000 | 20529999 | AgamP4_2 | 20585000 | 20589999 | 12   | -1.5843  | 4.1429  | 0.000255  | 0.00323   | no_enhancer                                                                  |
| AgamP4_2 | 20525000 | 20529999 | AgamP4_2 | 42165000 | 42169999 | 4328 | 6.9208   | 12.5497 | 2.89E-14  | 3.42E-13  | valid_nonDEG_promoter-enhancer_pair_but_not_valid_DEG_promoter-enhancer_pair |
| AgamP4_2 | 20525000 | 20529999 | AgamP4_2 | 42170000 | 42174999 | 4329 | 5.5654   | 11.5802 | 7.65E-06  | 2.05E-05  | no_enhancer                                                                  |
| AgamP4_2 | 20525000 | 20529999 | AgamP4_2 | 42175000 | 42179999 | 4330 | 4.9312   | 11.2247 | 0.00232   | 0.00397   | no_enhancer                                                                  |
| AgamP4_2 | 20525000 | 20529999 | AgamP4_2 | 42225000 | 42229999 | 4340 | 4        | 10.8165 | 0.0313    | 0.0368    | no_enhancer                                                                  |
| AgamP4_2 | 20530000 | 20534999 | AgamP4_2 | 42165000 | 42169999 | 4327 | 6.9942   | 12.6079 | 7.24E-15  | 9.79E-14  | promoter_and_enhancer_within_same_anchor                                     |
| AgamP4_2 | 20530000 | 20534999 | AgamP4_2 | 42170000 | 42174999 | 4328 | 6.4858   | 12.212  | 1.17E-10  | 8.34E-10  | no_promoter_or_enhancer                                                      |
| AgamP4_2 | 20530000 | 20534999 | AgamP4_2 | 42180000 | 42184999 | 4330 | 4.7611   | 11.1359 | 0.00195   | 0.00336   | no_enhancer                                                                  |
| AgamP4_2 | 20530000 | 20534999 | AgamP4_2 | 42190000 | 42194999 | 4332 | 4.109    | 10.857  | 0.0313    | 0.0368    | no_enhancer                                                                  |
| AgamP4_2 | 20530000 | 20534999 | AgamP4_2 | 42210000 | 42214999 | 4336 | 4.2181   | 10.8982 | 0.0156    | 0.0206    | no_enhancer                                                                  |
| AgamP4_2 | 20530000 | 20534999 | AgamP4_2 | 42220000 | 42224999 | 4338 | 4.535    | 11.0305 | 0.00782   | 0.0114    | promoter_and_enhancer_within_same_anchor                                     |
| AgamP4_2 | 20530000 | 20534999 | AgamP4_2 | 42225000 | 42229999 | 4339 | 4.4862   | 11.0098 | 0.00782   | 0.0114    | no_enhancer                                                                  |
| AgamP4_2 | 20530000 | 20534999 | AgamP4_2 | 42235000 | 42239999 | 4341 | 4.1049   | 10.8551 | 0.0313    | 0.0368    | no_enhancer                                                                  |
| AgamP4_2 | 20530000 | 20534999 | AgamP4_2 | 42240000 | 42244999 | 4342 | 4.4601   | 10.9975 | 0.00782   | 0.0114    | no_promoter_or_enhancer                                                      |
| AgamP4_2 | 20530000 | 20534999 | AgamP4_2 | 42255000 | 42259999 | 4345 | 4.2163   | 10.8977 | 0.0156    | 0.0206    | no_enhancer                                                                  |
| AgamP4_2 | 20530000 | 20534999 | AgamP4_2 | 42260000 | 42264999 | 4346 | 3.9775   | 10.8094 | 0.0313    | 0.0368    | no_promoter                                                                  |
| AgamP4_2 | 20535000 | 20539999 | AgamP4_2 | 42165000 | 42169999 | 4326 | 5.569    | 11.5821 | 7.65E-06  | 2.05E-05  | promoter_and_enhancer_within_same_anchor                                     |
| AgamP4_2 | 20535000 | 20539999 | AgamP4_2 | 42170000 | 42174999 | 4327 | 5.1847   | 11.3557 | 0.000244  | 0.000489  | no_promoter_or_enhancer                                                      |
| AgamP4_2 | 20535000 | 20539999 | AgamP4_2 | 42180000 | 42184999 | 4329 | 4.0562   | 10.8371 | 0.0313    | 0.0368    | no_enhancer                                                                  |
| AgamP4_2 | 20540000 | 20544999 | AgamP4_2 | 42165000 | 42169999 | 4325 | 6.2624   | 12.0478 | 3.75E-09  | 1.94E-08  | promoter_and_enhancer_within_same_anchor                                     |
| AgamP4_2 | 20540000 | 20544999 | AgamP4_2 | 42170000 | 42174999 | 4326 | 5.7741   | 11.7123 | 1.91E-06  | 5.91E-06  | no_promoter_or_enhancer                                                      |
| AgamP4_2 | 20540000 | 20544999 | AgamP4_2 | 42175000 | 42179999 | 4327 | 4.9868   | 11.2491 | 0.000489  | 0.000932  | no_enhancer                                                                  |
| AgamP4_2 | 20540000 | 20544999 | AgamP4_2 | 42180000 | 42184999 | 4328 | 4.7143   | 11.1145 | 0.00195   | 0.00336   | no_enhancer                                                                  |
| AgamP4_2 | 20540000 | 20544999 | AgamP4_2 | 42215000 | 42219999 | 4335 | 4.3123   | 10.9366 | 0.0156    | 0.0206    | no_enhancer                                                                  |
| AgamP4_2 | 20540000 | 20544999 | AgamP4_2 | 42225000 | 42229999 | 4337 | 5.0499   | 11.2827 | 0.000489  | 0.000932  | no_enhancer                                                                  |
| AgamP4_2 | 20540000 | 20544999 | AgamP4_2 | 42230000 | 42234999 | 4338 | 4.5367   | 11.0319 | 0.00782   | 0.0114    | no_promoter_or_enhancer                                                      |
| AgamP4_2 | 20540000 | 20544999 | AgamP4_2 | 42235000 | 42239999 | 4339 | 4.1677   | 10.8788 | 0.0313    | 0.0368    | no_enhancer                                                                  |
| AgamP4_2 | 20540000 | 20544999 | AgamP4_2 | 42255000 | 42259999 | 4343 | 4.3136   | 10.9366 | 0.0156    | 0.0206    | no_enhancer                                                                  |
| AgamP4_2 | 20540000 | 20544999 | AgamP4_2 | 42270000 | 42274999 | 4346 | 4.6145   | 11.0671 | 0.00391   | 0.00617   | no_promoter_or_enhancer                                                      |
| AgamP4_2 | 20540000 | 20544999 | AgamP4_2 | 42275000 | 42279999 | 4347 | 4.8612   | 11.1852 | 0.000977  | 0.00181   | no_promoter_or_enhancer                                                      |
| AgamP4_2 | 20545000 | 20549999 | AgamP4_2 | 42165000 | 42169999 | 4324 | 6.1392   | 11.9605 | 3.00E-08  | 1.22E-07  | valid_DEG_promoter-enhancer_pair_and_one_of_13_final_interactions            |
| AgamP4_2 | 20545000 | 20549999 | AgamP4_2 | 42175000 | 42179999 | 4326 | 4.7896   | 11.15   | 0.00195   | 0.00336   | no_enh                                                                       |

|          |          |          |          |          |          |      |         |         |          |          |                                                                                                          |
|----------|----------|----------|----------|----------|----------|------|---------|---------|----------|----------|----------------------------------------------------------------------------------------------------------|
| AgamP4_2 | 20555000 | 20559999 | AgamP4_2 | 42170000 | 42174999 | 4323 | 4.3115  | 10.9355 | 0.0156   | 0.0206   | promoter_and_enhancer_within_same_anchor                                                                 |
| AgamP4_2 | 20555000 | 20559999 | AgamP4_2 | 42260000 | 42264999 | 4341 | 4.7064  | 11.1095 | 0.00245  | 0.00417  | valid_nonDEG_promoter-enhancer_pair_but_not_valid_DEG_promoter-enhancer_pair                             |
| AgamP4_2 | 20555000 | 20559999 | AgamP4_2 | 42265000 | 42269999 | 4342 | 4.853   | 11.1814 | 0.000977 | 0.00181  | valid_nonDEG_promoter-enhancer_pair_but_not_valid_DEG_promoter-enhancer_pair                             |
| AgamP4_2 | 20555000 | 20559999 | AgamP4_2 | 42275000 | 42279999 | 4344 | 3.9688  | 10.8066 | 0.0313   | 0.0368   | promoter_and_enhancer_within_same_anchor                                                                 |
| AgamP4_2 | 20555000 | 20559999 | AgamP4_2 | 42280000 | 42284999 | 4345 | 3.9839  | 10.8113 | 0.0313   | 0.0368   | valid_nonDEG_promoter-enhancer_pair_but_not_valid_DEG_promoter-enhancer_pair                             |
| AgamP4_2 | 20560000 | 20564999 | AgamP4_2 | 42165000 | 42169999 | 4321 | 4.5359  | 11.0311 | 0.00782  | 0.0114   | valid_nonDEG_promoter-enhancer_pair_but_not_valid_DEG_promoter-enhancer_pair                             |
| AgamP4_2 | 20560000 | 20564999 | AgamP4_2 | 42170000 | 42174999 | 4322 | 4.3179  | 10.9378 | 0.0156   | 0.0206   | no_promoter                                                                                              |
| AgamP4_2 | 20560000 | 20564999 | AgamP4_2 | 42250000 | 42254999 | 4338 | 4.2491  | 10.9114 | 0.0156   | 0.0206   | no_promoter                                                                                              |
| AgamP4_2 | 20560000 | 20564999 | AgamP4_2 | 42255000 | 42259999 | 4339 | 4.5644  | 11.044  | 0.00391  | 0.00617  | valid_DEG_promoter-enhancer_pair_but_promoter_not_in_valid_DEG_promoter-enhancer_pair_in_2L+_interaction |
| AgamP4_2 | 20560000 | 20564999 | AgamP4_2 | 42260000 | 42264999 | 4340 | 4.7782  | 11.1438 | 0.00249  | 0.00421  | no_promoter                                                                                              |
| AgamP4_2 | 20560000 | 20564999 | AgamP4_2 | 42265000 | 42269999 | 4341 | 4.8416  | 11.1747 | 0.00195  | 0.00336  | valid_nonDEG_promoter-enhancer_pair_but_not_valid_DEG_promoter-enhancer_pair                             |
| AgamP4_2 | 20565000 | 20569999 | AgamP4_2 | 42165000 | 42169999 | 4320 | 4.5969  | 11.0598 | 0.00391  | 0.00617  | promoter_and_enhancer_within_same_anchor                                                                 |
| AgamP4_2 | 20565000 | 20569999 | AgamP4_2 | 42175000 | 42179999 | 4322 | 4.415   | 10.9786 | 0.00782  | 0.0114   | no_enhancer                                                                                              |
| AgamP4_2 | 20565000 | 20569999 | AgamP4_2 | 42220000 | 42224999 | 4331 | 4.0613  | 10.8392 | 0.0313   | 0.0368   | promoter_and_enhancer_within_same_anchor                                                                 |
| AgamP4_2 | 20570000 | 20574999 | AgamP4_2 | 42165000 | 42169999 | 4319 | 4.7922  | 11.1517 | 0.00195  | 0.00336  | valid_nonDEG_promoter-enhancer_pair_but_not_valid_DEG_promoter-enhancer_pair                             |
| AgamP4_2 | 20570000 | 20574999 | AgamP4_2 | 42170000 | 42174999 | 4320 | 4.6172  | 11.068  | 0.00391  | 0.00617  | no_promoter                                                                                              |
| AgamP4_2 | 20570000 | 20574999 | AgamP4_2 | 42175000 | 42179999 | 4321 | 4.1721  | 10.8809 | 0.0313   | 0.0368   | valid_nonDEG_promoter-enhancer_pair_but_not_valid_DEG_promoter-enhancer_pair                             |
| AgamP4_2 | 20575000 | 20579999 | AgamP4_2 | 42165000 | 42169999 | 4318 | 4.707   | 11.1091 | 0.00391  | 0.00617  | promoter_and_enhancer_within_same_anchor                                                                 |
| AgamP4_2 | 20575000 | 20579999 | AgamP4_2 | 42170000 | 42174999 | 4319 | 4.5785  | 11.0508 | 0.00391  | 0.00617  | no_promoter_or_enhancer                                                                                  |
| AgamP4_2 | 20575000 | 20579999 | AgamP4_2 | 42265000 | 42269999 | 4338 | 4.0472  | 10.8341 | 0.0313   | 0.0368   | no_enhancer                                                                                              |
| AgamP4_2 | 20575000 | 20579999 | AgamP4_2 | 42270000 | 42274999 | 4339 | 4.9087  | 11.2089 | 0.00116  | 0.00214  | no_promoter_or_enhancer                                                                                  |
| AgamP4_2 | 20575000 | 20579999 | AgamP4_2 | 42275000 | 42279999 | 4340 | 4.3164  | 10.9379 | 0.0156   | 0.0206   | no_promoter_or_enhancer                                                                                  |
| AgamP4_2 | 20580000 | 20584999 | AgamP4_2 | 42165000 | 42169999 | 4317 | 4.4502  | 10.9939 | 0.00782  | 0.0114   | promoter_and_enhancer_within_same_anchor                                                                 |
| AgamP4_2 | 20580000 | 20584999 | AgamP4_2 | 42170000 | 42174999 | 4318 | 4.5883  | 11.0543 | 0.00391  | 0.00617  | no_promoter_or_enhancer                                                                                  |
| AgamP4_2 | 20590000 | 20594999 | AgamP4_2 | 42165000 | 42169999 | 4315 | 4.4425  | 10.991  | 0.00782  | 0.0114   | promoter_and_enhancer_within_same_anchor                                                                 |
| AgamP4_2 | 20590000 | 20594999 | AgamP4_2 | 42170000 | 42174999 | 4316 | 4.1221  | 10.8615 | 0.0313   | 0.0368   | no_promoter_or_enhancer                                                                                  |
| AgamP4_2 | 20590000 | 20594999 | AgamP4_2 | 42175000 | 42179999 | 4317 | 4.1183  | 10.8596 | 0.0313   | 0.0368   | no_enhancer                                                                                              |
| AgamP4_2 | 36135000 | 36139999 | AgamP4_2 | 42395000 | 42399999 | 1252 | -7.8262 | 13.1752 | 4.20E-18 | 7.95E-17 | no_promoter_or_enhancer                                                                                  |
| AgamP4_2 | 36140000 | 36144999 | AgamP4_2 | 42390000 | 42394999 | 1250 | -7.5313 | 12.9087 | 1.28E-17 | 2.27E-16 | no_promoter_or_enhancer                                                                                  |
| AgamP4_2 | 42065000 | 42069999 | AgamP4_2 | 42165000 | 42169999 | 20   | -6.2383 | 3.8395  | 9.82E-09 | 1.03E-06 | valid_nonDEG_promoter-enhancer_pair_but_not_valid_DEG_promoter-enhancer_pair                             |
| AgamP4_2 | 42065000 | 42069999 | AgamP4_2 | 42170000 | 42174999 | 21   | -6.2043 | 4.2991  | 1.70E-08 | 2.69E-06 | no_enhancer                                                                                              |
| AgamP4_2 | 42085000 | 42089999 | AgamP4_2 | 42165000 | 42169999 | 16   | -6.4544 | 3.9947  | 1.38E-09 | 1.81E-07 | promoter_and_enhancer_within_same_anchor                                                                 |
| AgamP4_2 | 42095000 | 42099999 | AgamP4_2 | 42165000 | 42169999 | 14   | -6.2833 | 3.4173  | 5.63E-09 | 3.87E-07 | promoter_and_enhancer_within_same_anchor                                                                 |
| AgamP4_2 | 42095000 | 42099999 | AgamP4_2 | 42170000 | 42174999 | 15   | -6.2194 | 3.8261  | 2.53E-08 | 2.35E-06 | no_promoter_or_enhancer                                                                                  |
| AgamP4_2 | 42110000 | 42114999 | AgamP4_2 | 42165000 | 42169999 | 11   | -6.438  | 3.5289  | 7.41E-10 | 6.52E-08 | promoter_and_enhancer_within_same_anchor                                                                 |
| AgamP4_2 | 42110000 | 42114999 | AgamP4_2 | 42170000 | 42174999 | 12   | -6.2995 | 3.4288  | 5.68E-09 | 3.89E-07 | no_promoter_or_enhancer                                                                                  |
| AgamP4_2 | 42115000 | 42119999 | AgamP4_2 | 42165000 | 42169999 | 10   | -6.4833 | 3.5621  | 3.81E-10 | 3.57E-08 | promoter_and_enhancer_within_same_anchor                                                                 |
| AgamP4_2 | 42120000 | 42124999 | AgamP4_2 | 42165000 | 42169999 | 9    | -6.8391 | 3.3651  | 8.65E-13 | 6.42E-11 | promoter_and_enhancer_within_same_anchor                                                                 |
| AgamP4_2 | 42120000 | 42124999 | AgamP4_2 | 42170000 | 42174999 | 10   | -6.222  | 3.3741  | 2.10E-08 | 1.21E-06 | no_promoter_or_enhancer                                                                                  |
| AgamP4_2 | 42125000 | 42129999 | AgamP4_2 | 42165000 | 42169999 | 8    | -4.7814 | 3.4891  | 1.35E-12 | 9.68E-11 | valid_DEG_promoter-enhancer_pair_and_one_of_13_final_interactions                                        |
| AgamP4_2 | 42125000 | 42129999 | AgamP4_2 | 42170000 | 42174999 | 9    | -6.722  | 3.2742  | 6.61E-12 | 4.18E-10 | no_enhancer                                                                                              |
| AgamP4_2 | 42130000 | 42134999 | AgamP4_2 | 42165000 | 42169999 | 7    | -7.4032 | 3.8242  | 8.71E-19 | 1.42E-16 | promoter_and_enhancer_within_same_anchor                                                                 |
| AgamP4_2 | 42130000 | 42134999 | AgamP4_2 | 42170000 | 42174999 | 8    | -7.0758 | 3.5537  | 4.51E-15 | 4.72E-13 | no_promoter_or_enhancer                                                                                  |
| AgamP4_2 | 42130000 | 42134999 | AgamP4_2 | 42215000 | 42219999 | 17   | -6.432  | 3.9786  | 8.89E-10 | 1.24E-07 | no_enhancer                                                                                              |
| AgamP4_2 | 42130000 | 42134999 | AgamP4_2 | 42225000 | 42229999 | 19   | -6.2821 | 3.8703  | 8.66E-09 | 9.15E-07 | no_enhancer                                                                                              |
| AgamP4_2 | 42130000 | 42134999 | AgamP4_2 | 42230000 | 42234999 | 20   | -4.9224 | 4.3957  | 1.93E-12 | 4.95E-10 | no_promoter_or_enhancer                                                                                  |
| AgamP4_2 | 42130000 | 42134999 | AgamP4_2 | 42260000 | 42264999 | 26   | -4.091  | 4.389   | 1.23E-07 | 1.45E-05 | no_promoter                                                                                              |
| AgamP4_2 | 42130000 | 42134999 | AgamP4_2 | 42265000 | 42269999 | 27   | -6.5634 | 4.5597  | 8.84E-11 | 3.04E-08 | no_enhancer                                                                                              |
| AgamP4_2 | 42130000 | 42134999 | AgamP4_2 | 42270000 | 42274999 | 28   | -3.5381 | 5.1159  | 5.07E-08 | 1.12E-05 | no_promoter_or_enhancer                                                                                  |
| AgamP4_2 | 42130000 | 42134999 | AgamP4_2 | 42275000 | 42279999 | 29   | -6.3628 | 4.9616  | 3.55E-09 | 1.51E-06 | no_promoter_or_enhancer                                                                                  |
| AgamP4_2 | 42130000 | 42134999 | AgamP4_2 | 42280000 | 42284999 | 30   | -6.1897 | 4.8386  | 2.18E-08 | 5.83E-06 | no_enhancer                                                                                              |
| AgamP4_2 | 42135000 | 42139999 | AgamP4_2 | 42165000 | 42169999 | 6    | -7.4313 | 3.8479  | 4.66E-19 | 7.81E-17 | promoter_and_enhancer_within_same_anchor                                                                 |
| AgamP4_2 | 42135000 | 42139999 | AgamP4_2 | 42170000 | 42174999 | 7    | -4.971  | 3.5888  | 1.05E-13 | 9.05E-12 | no_promoter_or_enhancer                                                                                  |
| AgamP4_2 | 42135000 | 42139999 | AgamP4_2 | 42215000 | 42219999 | 16   | -6.2308 | 3.8342  | 1.09E-08 | 1.12E-06 | no_enhancer                                                                                              |
| AgamP4_2 | 42135000 | 42139999 | AgamP4_2 | 42225000 | 42229999 | 18   | -6.7392 | 4.2098  | 1.61E-11 | 3.36E-09 | no_enhancer                                                                                              |
| AgamP4_2 | 42135000 | 42139999 | AgamP4_2 | 42230000 | 42234999 | 19   | -6.3988 | 3.9543  | 1.21E-09 | 1.60E-07 | no_promoter_or_enhancer                                                                                  |
| AgamP4_2 | 42135000 | 42139999 | AgamP4_2 | 42255000 | 42259999 | 24   | -4.0349 | 4.3497  | 2.37E-07 | 2.53E-05 | no_enhancer                                                                                              |
| AgamP4_2 | 42135000 | 42139999 | AgamP4_2 | 42260000 | 42264999 | 25   | -6.4168 | 4.4511  | 1.25E-09 | 2.91E-07 | no_promoter                                                                                              |
| AgamP4_2 | 42135000 | 42139999 | AgamP4_2 | 42265000 | 42269999 | 26   | -6.5502 | 4.5498  | 8.40E-11 | 2.92E-08 | no_enhancer                                                                                              |
| AgamP4_2 | 42135000 | 42139999 | AgamP4_2 | 42270000 | 42274999 | 27   | -6.3673 | 4.4151  | 2.44E-09 | 4.98E-07 | no_promoter_or_enhancer                                                                                  |
| AgamP4_2 | 42135000 | 42139999 | AgamP4_2 | 42275000 | 42279999 | 28   | -6.4068 | 4.9935  | 1.57E-09 | 7.65E-07 | no_promoter_or_enhancer                                                                                  |
| AgamP4_2 | 42140000 | 42144999 | AgamP4_2 | 42165000 | 42169999 | 5    | -8.0786 | 3.8068  | 3.45E-28 | 4.94E-26 | promoter_and_enhancer_within_same_anchor                                                                 |
| AgamP4_2 | 42140000 | 42144999 | AgamP4_2 | 42170000 | 42174999 | 6    | -6.9918 | 3.486   | 3.05E-14 | 2.86E-12 | no_promoter_or_enhancer                                                                                  |
| AgamP4_2 | 42140000 | 42144999 | AgamP4_2 | 42175000 | 42179999 | 7    | -6.4039 | 3.0363  | 1.33E-09 | 5.25E-08 | no_enhancer                                                                                              |
| AgamP4_2 | 42140000 | 42144999 | AgamP4_2 | 42215000 | 42219999 | 15   | -6.287  | 3.874   | 5.95E-09 | 6.53E-07 | no_enhancer                                                                                              |
| AgamP4_2 | 42140000 | 42144999 | AgamP4_2 | 42220000 | 42224999 | 16   | -6.208  | 3.8181  | 2.41E-08 | 2.26E-06 | promoter_and_enhancer_within_same_anchor                                                                 |
| AgamP4_2 | 42140000 | 42144999 | AgamP4_2 | 42225000 | 42229999 | 17   | -6.4473 | 3.9899  | 1.17E-09 | 1.58E-07 | no_enhancer                                                                                              |
| AgamP4_2 | 42140000 | 42144999 | AgamP4_2 | 42230000 | 42234999 | 18   | -6.4688 | 4.0059  | 7.19E-10 | 1.04E-07 | no_promoter_or_enhancer                                                                                  |
| AgamP4_2 | 42140000 | 42144999 | AgamP4_2 | 42245000 | 42249999 | 21   | -6.2737 | 4.3481  | 1.09E-08 | 1.86E-06 | no_promoter_or_enhancer                                                                                  |
| AgamP4_2 | 42140000 | 42144999 | AgamP4_2 | 42250000 | 42254999 | 22   | -6.5862 | 4.5768  | 8.30E-11 | 2.91E-08 | no_promoter_or_enhancer                                                                                  |
| AgamP4_2 | 42140000 | 42144999 | AgamP4_2 | 42255000 | 42259999 | 23   | -6.5658 | 4.5615  | 1.14E-10 | 3.84E-08 | no_enhancer                                                                                              |
| AgamP4_2 | 42140000 | 42144999 | AgamP4_2 | 42260000 | 42264999 | 24   | -6.7376 | 4.6923  | 7.02E-12 | 3.01E-09 | no_promoter                                                                                              |
| AgamP4_2 | 42145000 | 42149999 | AgamP4_2 | 42165000 | 42169999 | 4    | -6.0992 | 3.989   | 4.29E-31 | 7.04E-29 | valid_nonDEG_promoter-enhancer_pair_but_not_valid_DEG_promoter-enhancer_pair                             |
| AgamP4_2 | 42145000 | 42149999 | AgamP4_2 | 42170000 | 42174999 | 5    | -7.6689 | 3.4455  | 6.83E-22 | 6.41E-20 | no_enhancer                                                                                              |
| AgamP4_2 | 42145000 | 42149999 | AgamP4_2 | 42175000 | 42179999 | 6    | -6.8334 | 3.3607  | 8.64E-13 | 6.42E-11 | no_enhancer                                                                                              |
| AgamP4_2 | 42145000 | 42149999 | AgamP4_2 | 42210000 | 42214999 | 13   | -6.959  | 3.9275  | 7.43E-14 | 1.41E-11 | no_enhancer                                                                                              |
| AgamP4_2 | 42145000 | 42149999 | AgamP4_2 | 42220000 | 42224999 | 15   | -6.4213 | 3.9708  | 7.19E-10 | 1.04E-07 | valid_nonDEG_promoter-enhancer_pair_but_not_valid_DEG_promoter-enhancer_pair                             |
| AgamP4_2 | 42145000 | 42149999 | AgamP4_2 | 42235000 | 42239999 | 18   | -4.4878 | 4.1451  | 9.51E-10 | 1.32E-07 | no_enhancer                                                                                              |
| AgamP4_2 | 42145000 | 42149999 | AgamP4_2 | 42240000 | 42244999 | 19   | -6.3539 | 3.9219  | 2.52E-09 | 3.10E-07 | no_enhancer                                                                                              |
| AgamP4_2 | 42145000 | 42149999 | AgamP4_2 | 42250000 | 42254999 | 21   | -6.6798 | 4.6478  | 1.58E-11 | 6.18E-09 | no_enhancer                                                                                              |
| AgamP4_2 | 42145000 | 42149999 | AgamP4_2 | 42255000 | 42259999 | 22   | -3.8739 | 4.8495  | 1.06E-10 | 3.60E-08 | no_enhancer                                                                                              |
| AgamP4_2 | 42145000 | 42149999 | AgamP4_2 | 42265000 | 42269999 | 24   | -6.4281 | 4.4594  | 5.76E-10 | 1.51E-07 | no_enhancer                                                                                              |
| AgamP4_2 | 42150000 | 42154999 | AgamP4_2 | 42165000 | 42169999 | 3    | -8.1773 | 3.8955  | 5.05E-31 | 8.24E-29 | promoter_and_enhancer_within_same_anchor                                                                 |
| AgamP4_2 | 42150000 | 42154999 | AgamP4_2 | 42170000 | 42174999 | 4    | -7.3524 | 3.1757  | 7.44E-18 | 4.77E-16 | no_promoter_or_enhancer                                                                                  |
| AgamP4_2 | 42150000 |          |          |          |          |      |         |         |          |          |                                                                                                          |

|          |          |          |          |          |          |    |         |        |           |           |                                                                   |
|----------|----------|----------|----------|----------|----------|----|---------|--------|-----------|-----------|-------------------------------------------------------------------|
| AgamP4_2 | 42155000 | 42159999 | AgamP4_2 | 42205000 | 42209999 | 10 | -6.2844 | 3.4181 | 5.57E-09  | 3.85E-07  | no_enhancer                                                       |
| AgamP4_2 | 42155000 | 42159999 | AgamP4_2 | 42210000 | 42214999 | 11 | -6.7348 | 3.7519 | 7.06E-12  | 9.31E-10  | no_enhancer                                                       |
| AgamP4_2 | 42155000 | 42159999 | AgamP4_2 | 42215000 | 42219999 | 12 | -6.9895 | 3.9519 | 3.97E-14  | 8.25E-12  | no_enhancer                                                       |
| AgamP4_2 | 42155000 | 42159999 | AgamP4_2 | 42220000 | 42224999 | 13 | -6.9677 | 3.9345 | 6.81E-14  | 1.31E-11  | promoter_and_enhancer_within_same_anchor                          |
| AgamP4_2 | 42155000 | 42159999 | AgamP4_2 | 42225000 | 42229999 | 14 | -6.8539 | 3.8444 | 5.13E-13  | 8.22E-11  | no_enhancer                                                       |
| AgamP4_2 | 42155000 | 42159999 | AgamP4_2 | 42230000 | 42234999 | 15 | -6.3794 | 3.9402 | 1.70E-09  | 2.19E-07  | no_promoter_or_enhancer                                           |
| AgamP4_2 | 42155000 | 42159999 | AgamP4_2 | 42235000 | 42239999 | 16 | -6.6132 | 4.1134 | 5.17E-11  | 9.55E-09  | no_enhancer                                                       |
| AgamP4_2 | 42155000 | 42159999 | AgamP4_2 | 42240000 | 42244999 | 17 | -6.6052 | 4.1073 | 6.74E-11  | 1.22E-08  | no_promoter_or_enhancer                                           |
| AgamP4_2 | 42155000 | 42159999 | AgamP4_2 | 42250000 | 42254999 | 19 | -6.8451 | 4.2919 | 1.14E-12  | 3.09E-10  | no_promoter_or_enhancer                                           |
| AgamP4_2 | 42155000 | 42159999 | AgamP4_2 | 42255000 | 42259999 | 20 | -6.8365 | 4.2855 | 3.83E-12  | 9.37E-10  | no_enhancer                                                       |
| AgamP4_2 | 42155000 | 42159999 | AgamP4_2 | 42260000 | 42264999 | 21 | -6.5322 | 4.5364 | 1.70E-10  | 5.41E-08  | no_promoter                                                       |
| AgamP4_2 | 42155000 | 42159999 | AgamP4_2 | 42265000 | 42269999 | 22 | -6.8222 | 4.758  | 7.82E-13  | 4.13E-10  | no_enhancer                                                       |
| AgamP4_2 | 42155000 | 42159999 | AgamP4_2 | 42275000 | 42279999 | 24 | -6.4363 | 4.4654 | 5.43E-10  | 1.47E-07  | no_promoter_or_enhancer                                           |
| AgamP4_2 | 42155000 | 42159999 | AgamP4_2 | 42280000 | 42284999 | 25 | -6.521  | 4.528  | 1.82E-10  | 5.58E-08  | no_enhancer                                                       |
| AgamP4_2 | 42160000 | 42164999 | AgamP4_2 | 42165000 | 42169999 | 1  | -7.7113 | 4.7405 | 1.06E-125 | 1.10E-122 | valid_DEG_promoter-enhancer_pair_and_one_of_13_final_interactions |
| AgamP4_2 | 42160000 | 42164999 | AgamP4_2 | 42170000 | 42174999 | 2  | -9.0363 | 3.3859 | 5.73E-54  | 7.68E-52  | no_enhancer                                                       |
| AgamP4_2 | 42160000 | 42164999 | AgamP4_2 | 42175000 | 42179999 | 3  | -7.973  | 3.7125 | 4.52E-27  | 6.02E-25  | no_enhancer                                                       |
| AgamP4_2 | 42160000 | 42164999 | AgamP4_2 | 42180000 | 42184999 | 4  | -6.8154 | 2.7407 | 1.04E-12  | 3.18E-11  | no_enhancer                                                       |
| AgamP4_2 | 42160000 | 42164999 | AgamP4_2 | 42185000 | 42189999 | 5  | -6.7397 | 2.682  | 7.21E-12  | 1.89E-10  | no_enhancer                                                       |
| AgamP4_2 | 42160000 | 42164999 | AgamP4_2 | 42190000 | 42194999 | 6  | -6.4174 | 3.0461 | 1.33E-09  | 5.25E-08  | no_enhancer                                                       |
| AgamP4_2 | 42160000 | 42164999 | AgamP4_2 | 42205000 | 42209999 | 9  | -6.3426 | 2.9921 | 2.78E-09  | 1.02E-07  | no_enhancer                                                       |
| AgamP4_2 | 42160000 | 42164999 | AgamP4_2 | 42210000 | 42214999 | 10 | -6.8735 | 3.8599 | 5.27E-13  | 8.42E-11  | no_enhancer                                                       |
| AgamP4_2 | 42160000 | 42164999 | AgamP4_2 | 42215000 | 42219999 | 11 | -7.0731 | 4.0193 | 5.30E-15  | 1.28E-12  | no_enhancer                                                       |
| AgamP4_2 | 42160000 | 42164999 | AgamP4_2 | 42220000 | 42224999 | 12 | -7.0621 | 4.0103 | 9.19E-15  | 2.10E-12  | valid_DEG_promoter-enhancer_pair_and_one_of_13_final_interactions |
| AgamP4_2 | 42160000 | 42164999 | AgamP4_2 | 42225000 | 42229999 | 13 | -6.9277 | 3.9027 | 1.34E-13  | 2.40E-11  | no_enhancer                                                       |
| AgamP4_2 | 42160000 | 42164999 | AgamP4_2 | 42230000 | 42234999 | 14 | -6.8402 | 3.8337 | 9.79E-13  | 1.48E-10  | no_enhancer                                                       |
| AgamP4_2 | 42160000 | 42164999 | AgamP4_2 | 42235000 | 42239999 | 15 | -6.7344 | 4.2059 | 5.28E-12  | 1.23E-09  | no_enhancer                                                       |
| AgamP4_2 | 42160000 | 42164999 | AgamP4_2 | 42240000 | 42244999 | 16 | -6.9997 | 4.4146 | 2.13E-14  | 7.50E-12  | no_enhancer                                                       |
| AgamP4_2 | 42160000 | 42164999 | AgamP4_2 | 42245000 | 42249999 | 17 | -6.4844 | 4.0171 | 3.10E-10  | 4.79E-08  | no_enhancer                                                       |
| AgamP4_2 | 42160000 | 42164999 | AgamP4_2 | 42250000 | 42254999 | 18 | -7.3437 | 4.6968 | 7.92E-18  | 4.28E-15  | no_enhancer                                                       |
| AgamP4_2 | 42160000 | 42164999 | AgamP4_2 | 42255000 | 42259999 | 19 | -6.9231 | 4.3535 | 1.14E-13  | 3.62E-11  | no_enhancer                                                       |
| AgamP4_2 | 42160000 | 42164999 | AgamP4_2 | 42260000 | 42264999 | 20 | -6.9619 | 4.3844 | 4.79E-14  | 1.63E-11  | valid_DEG_promoter-enhancer_pair_and_one_of_13_final_interactions |
| AgamP4_2 | 42160000 | 42164999 | AgamP4_2 | 42265000 | 42269999 | 21 | -7.1912 | 5.0545 | 7.52E-16  | 8.07E-13  | no_enhancer                                                       |
| AgamP4_2 | 42160000 | 42164999 | AgamP4_2 | 42270000 | 42274999 | 22 | -6.8426 | 4.7741 | 1.16E-12  | 5.88E-10  | no_enhancer                                                       |
| AgamP4_2 | 42160000 | 42164999 | AgamP4_2 | 42275000 | 42279999 | 23 | -6.7829 | 4.7274 | 1.62E-12  | 7.95E-10  | no_enhancer                                                       |
| AgamP4_2 | 42160000 | 42164999 | AgamP4_2 | 42280000 | 42284999 | 24 | -4.4052 | 4.5777 | 3.19E-09  | 6.42E-07  | no_enhancer                                                       |
| AgamP4_2 | 42160000 | 42164999 | AgamP4_2 | 42285000 | 42289999 | 25 | -6.3038 | 4.3695 | 4.02E-09  | 7.67E-07  | no_enhancer                                                       |

**Table S3. Raw interaction counts, fold change, and adjusted p-value for the 13 interactions involved in enhancer rewiring.**

| Anchor1                       | Anchor2                       | 2L <sup>+</sup> _rep1_<br>raw_count | 2L <sup>+</sup> _rep2_<br>raw_count | 2L <sup>+</sup> _rep3_<br>raw_count | 2La_rep1_<br>raw_count | 2La_rep2_<br>raw_count | 2La_rep3_<br>raw_count | Fold<br>change | Adj p-<br>value |
|-------------------------------|-------------------------------|-------------------------------------|-------------------------------------|-------------------------------------|------------------------|------------------------|------------------------|----------------|-----------------|
| EP1 (20485000)                | AGAP007066<br>(42160000)      | 0                                   | 0                                   | 0                                   | 6                      | 13                     | 12                     | 3.9797         | 0.0368          |
| EP2 (20520000)                | AGAP007066<br>(42160000)      | 0                                   | 0                                   | 0                                   | 110                    | 112                    | 99                     | 7.6919         | 1.07E-19        |
| EP2 (20520000)                | AGAP007063/7064<br>(42125000) | 0                                   | 0                                   | 0                                   | 18                     | 10                     | 15                     | 4.5897         | 0.00617         |
| AGAP005781<br>(20545000)      | ED1<br>(42165000)             | 0                                   | 0                                   | 0                                   | 37                     | 41                     | 36                     | 6.1392         | 1.22E-07        |
| AGAP005781<br>(20545000)      | ED2 (42220000)                | 0                                   | 0                                   | 0                                   | 13                     | 13                     | 12                     | 4.3599         | 0.0206          |
| AGAP005781<br>(20545000)      | ED3<br>(42260000)             | 0                                   | 0                                   | 0                                   | 12                     | 17                     | 10                     | 4.3941         | 0.0114          |
| EP1 (20485000)                | AGAP005781<br>(20545000)      | 18                                  | 18                                  | 15                                  | 0                      | 0                      | 0                      | -6.9552        | 1.31E-11        |
| EP1 (20490000)                | AGAP005781<br>(20545000)      | 11                                  | 15                                  | 17                                  | 0                      | 0                      | 0                      | -6.7122        | 9.59E-10        |
| EP2 (20520000)                | AGAP005781<br>(20545000)      | 53                                  | 58                                  | 67                                  | 0                      | 1                      | 1                      | -5.8974        | 2.21E-39        |
| AGAP007063/7064<br>(42125000) | ED1<br>(42165000)             | 17                                  | 18                                  | 16                                  | 1                      | 0                      | 0                      | -4.7814        | 9.68E-11        |
| AGAP007066<br>(42160000)      | ED1<br>(42165000)             | 185                                 | 203                                 | 186                                 | 2                      | 0                      | 0                      | -7.7113        | 1.10E-<br>122   |
| AGAP007066<br>(42160000)      | ED2 (42220000)                | 17                                  | 18                                  | 20                                  | 0                      | 0                      | 0                      | -7.0621        | 2.10E-12        |
| AGAP007066<br>(42160000)      | ED3<br>(42260000)             | 18                                  | 13                                  | 21                                  | 0                      | 0                      | 0                      | -6.9619        | 1.63E-11        |

**Table S6. Primer sequences**

| Primer name | Use                                                   | Primer sequence 5'–3'                        |
|-------------|-------------------------------------------------------|----------------------------------------------|
| EP1_FWD     | Cloning of enhancer fragments for luciferase activity | TAG AGG TAC CAG ATG<br>CAT GGG ACG ACG AG    |
| EP1_REV     | Cloning of enhancer fragments for luciferase activity | GCT AGA GCT CGC ACT<br>CGC GCT CCC TGAA      |
| EP2_FWD     | Cloning of enhancer fragments for luciferase activity | TAG AGG TAC CGT GTA<br>GTT GCC GGA CGT ATG   |
| EP2_REV     | Cloning of enhancer fragments for luciferase activity | GCT AGA GCT CTC GAA<br>AAT GAT CCG TTA CGC T |
| ED1_FWD     | Cloning of enhancer fragments for luciferase activity | TAG AGG TAC CGG CGA<br>TCA TGT GCG ATC TTT   |
| ED1_REV     | Cloning of enhancer fragments for luciferase activity | GCT AGA GCT CAA CCG<br>GAT CAA GAG TCG AGC   |
| ED2_FWD     | Cloning of enhancer fragments for luciferase activity | TAG AGG TAC CCC ATT<br>GCA GAC CAG CTG TAT C |
| ED2_REV     | Cloning of enhancer fragments for luciferase activity | GCT AGA GCT CGC TTT<br>CGC ACG CTC TGG TAC G |
| ED3_FWD     | Cloning of enhancer fragments for luciferase activity | TAG AGG TAC CGC AAT<br>GAA GCG TCG TAC AGT   |

|            |                                                       |                                            |
|------------|-------------------------------------------------------|--------------------------------------------|
| ED3_REV    | Cloning of enhancer fragments for luciferase activity | GCT AGA GCT CGC GCT<br>GCC TTA TGT TCT CAC |
| LRIM1_EN_F | Cloning of enhancer fragments for luciferase activity | GTC TCG CGG GAA AGT<br>CAA AA              |
| LRIM1_EN_R | Cloning of enhancer fragments for luciferase activity | ACA AAA CGC TTC CAT<br>TAC GC              |
| LucNrev    | Sequencing verification of cloned fragments           | CCT TAT GCA GTT GCT<br>CTC C               |
| RVprimer3  | Sequencing verification of cloned fragments           | CTA GCA AAA TAG GCT<br>GTC CC              |

**Table S4. Micro-C Mapping Metrics Raw Values**

| Parameters                        | Ag55_Replicate 1 | Ag55_Replicate 2 | Ag55_Replicate 3 | SUA_Replicate 1 | SUA_Replicate 2 | SUA_Replicate 3 |
|-----------------------------------|------------------|------------------|------------------|-----------------|-----------------|-----------------|
| Total sequence Read Pairs         | 201,677,697      | 223,453,933      | 233,281,302      | 234,403,080     | 203,685,343     | 221,961,166     |
| Total unmapped Read Pairs         | 33,079,492       | 32,331,443       | 32,858,978       | 35,775,913      | 34,128,080      | 37,173,169      |
| Rotal_single_sided_mapped Read P: | 56,913,216       | 63,912,292       | 68,381,223       | 69,942,111      | 60,316,907      | 66,346,780      |
| Total_two_sided_mapped Read Pair  | 111,684,989      | 127,210,198      | 132,041,101      | 128,685,056     | 109,240,356     | 118,441,217     |
| Total_duplicate Read Pairs        | 9,931,289        | 11,591,271       | 14,565,823       | 16,390,268      | 13,736,696      | 16,659,233      |
| Total_no_duplicates Read Pairs    | 101,753,700      | 115,618,927      | 117,475,278      | 112,294,788     | 95,503,660      | 101,781,984     |
| cis                               | 81,291,181       | 83,362,085       | 87,788,096       | 87,186,455      | 80,425,062      | 83,801,392      |
| trans                             | 20,462,519       | 32,256,842       | 29,687,182       | 25,108,333      | 15,078,598      | 17,980,592      |
| cis_1kb+                          | 66,949,569       | 65,716,845       | 70,466,676       | 69,040,333      | 64,882,486      | 69,375,473      |
| cis_2kb+                          | 62,466,785       | 60,131,705       | 65,201,609       | 63,286,606      | 60,536,420      | 65,063,918      |
| cis_4kb+                          | 57,010,061       | 53,830,516       | 59,253,151       | 57,025,581      | 55,157,901      | 59,782,822      |
| cis_10kb+                         | 49,789,551       | 46,402,258       | 51,927,986       | 49,513,779      | 47,719,299      | 52,383,616      |
| cis_20kb+                         | 44,559,518       | 41,441,137       | 46,780,633       | 44,332,129      | 42,334,501      | 46,830,876      |
| cis_40kb+                         | 39,441,437       | 36,782,494       | 41,769,090       | 39,365,303      | 37,162,476      | 41,388,084      |

**Table S5. Micro-C Mapping Metrics Proportions**

| Parameters                                   | Ag55_Replicate 1 | Ag55_Replicate 2 | Ag55_Replicate 3 | SUA_Replicate 1 | SUA_Replicate 2 | SUA_Replicate 3 |
|----------------------------------------------|------------------|------------------|------------------|-----------------|-----------------|-----------------|
| <b>Proportion of total sequece reads</b>     |                  |                  |                  |                 |                 |                 |
| Total sequence Reads                         | 100.00%          | 100.00%          | 100.00%          | 100.00%         | 100.00%         | 100.00%         |
| Total unmapped Reads                         | 16.40%           | 14.47%           | 14.09%           | 15.26%          | 16.76%          | 16.75%          |
| Rotal_single_sided_mapped reads              | 28.22%           | 28.60%           | 29.31%           | 29.84%          | 29.61%          | 29.89%          |
| Total_two_sided_mapped reads                 | 55.38%           | 56.93%           | 56.60%           | 54.90%          | 53.63%          | 53.36%          |
| Total_duplicate reads                        | 4.92%            | 5.19%            | 6.24%            | 6.99%           | 6.74%           | 7.51%           |
| Total_no_duplicates reads                    | 50.45%           | 51.74%           | 50.36%           | 47.91%          | 46.89%          | 45.86%          |
| <b>Proportion of No-Duplicate Read Pairs</b> |                  |                  |                  |                 |                 |                 |
| cis                                          | 79.89%           | 72.10%           | 74.73%           | 77.64%          | 84.21%          | 82.33%          |
| trans                                        | 20.11%           | 27.90%           | 25.27%           | 22.36%          | 15.79%          | 17.67%          |
| cis_1kb+                                     | 65.80%           | 56.84%           | 59.98%           | 61.48%          | 67.94%          | 68.16%          |
| cis_2kb+                                     | 61.39%           | 52.01%           | 55.50%           | 56.36%          | 63.39%          | 63.92%          |
| cis_4kb+                                     | 56.03%           | 46.56%           | 50.44%           | 50.78%          | 57.75%          | 58.74%          |
| cis_10kb+                                    | 48.93%           | 40.13%           | 44.20%           | 44.09%          | 49.97%          | 51.47%          |
| cis_20kb+                                    | 43.79%           | 35.84%           | 39.82%           | 39.48%          | 44.33%          | 46.01%          |
| cis_40kb+                                    | 38.76%           | 31.81%           | 35.56%           | 35.06%          | 38.91%          | 40.66%          |

Fasta sequences of cloned enhancers

>EP1\_2La+

AGATGCATGGGACGACGAGACGATGTCATCCACCAGACGGAGTGTGAAGCGAATGGGACTTGATTTCCCTAAGCGCTTATGCT  
CTTTTAGCAGATTACCATAACCAAGACACAGCACAGAGAACACATCCAATCGCTGTTCTTGCTATCACACTCTTCCATCCCCT  
TCTAAAACCCCTAAACTTGAATAGATTGAAAAGAAATATAAAAAAAAAATCAGCGAAAAATCAGAATCAGAAAAGGCCAAAAC  
GTCCCAGCCATTCGCTCGGTCGGATTGCAACAATCGTAGCGGACAAAAGGCGTGAGGAAATTGATATCTGTCAACTACACCGCC  
GCTGACAGCATTACGCTACCATTGGCGAACCGAGGCTAAACCAGGAGGCCTGGTCATTCCACACAAAAGCGACTCCAGAGCATG  
AGCGACATGCAAAAACAAAAGAATACAAATACATGCATGCACACACAGGCACACACACACTTGACAGGATGCCCGCAACCAACA  
ACACCATGTGGCAATCACCAGTGCAATGTGCAACATGTCTAGGCGATTGCATTGCGAAGCGTCTCGCTAACGGAGAGGGTGCA  
ACACGAGTAAGGGGGGGGATTTGAATCGGTGTATCCGTATACCGTTAGCAACCATCGCAAGATCAACATGTGTTGAGGCACA  
ACAGGCTGATTTGTTTGGCAGAGGTGAACTGGCATGTTTCAGGGAGCGCGAGTGC

>EP1\_2La

AGATGCATGGGACGACGAGACGATGTCATCCACCAGACGGAGTGTGAAGCGAATGGGGCTTGATTTCCCTAAGCGCTTATACT  
CTTTTAGCAGATTACCATAACCAAGACACAGCACAGAGAACACATCCAATCGCTTTTCTTGCAAGCACACTCTTCCATCCCCT  
TCTAAAACCCCTAAACTTGAATAGATTGAAAAGAAATATTAAGAAAGTAGCGAAAAAATCAGAATCAGAAAAACCAAAC  
GTTCCAGCCATTCGCTCGGTCGGATTGCAACAATCGTAGCGGACAAAAGGCGTGAGGAAATTGATATCTGTCAACTACACCGCC  
GCTGACAGCGTTACGCTACCATTGGCGAACCGTGCTAAACCAGGAGGCCTGGTCATTCCACACAAAAGCGACTCCAGAGCATG  
AGCGACATGCAAAAACAAAAGAATACAAATACAGGCATGCACACAGACACACACACACTTGACAGGATGCCTGCAACCAACCAA  
CCAACCATGTGGCAATCACCAGTGCAATGTGCAACATGTCTAGGCGATTGCATTGCGAAGCGTCTACTAACGGAGTGGGTGC  
AACACGAGTAAAGCTGTTACTGTTAGCAACCATCGCAAGATCAACATGTGTTGAGGCACAACAGGCTGATTTGTTTGGCAGAG  
GTACTGGCATGCTTCAGGGAGCGCGAGTGC

>EP2\_2La+

GTGTAGTTGCCGGACGTATGGCGCCAGTAGCTGTAGAAGTCGTACAAGCGCACCGTATCCGGCCGTCTGCCGGTCAGCATCGA  
ATTGCGGCTCGGTGCGCACAGAGCTTGCTGAAATGCATTGACGATGGGGTTTGGGAGTAAGTGAATAAAAACGGAATAAAGA  
ACCCCGCCCCAATCGTGCCTTACCTGTGCGAAAGCATTGTTGAAAGAAGAAACCTTGCTGCACCAGCCGATCGATGTTGACCG  
TGATGGCGTTACCATCGCCGTAGCCGTAATTTATCACCGGGCGAAAGTCATCCAAAATTATCAACAGTACGTTGGGCTGATCC  
GGCGGTGCTTGTGTTGCGGTTGTGCTTATCAAAAAGGTTAAACAGAGCAAAGAAAGCAATAAACGCACCTTGCAACGCCACAT  
TGTTTACGCTCTGACTGCACAACCTTGATGCAACGGAAGTTGAAACAAAAGTGATAACAATTGCGTCAACCGAGCTTGTGAA  
GAGTGCAAGAGGAATCACAACCGAAACAGGGGTTTTACATACGTCACATAACCGAAATGGATTTTTTCGATTTACGATGCTGTT  
CACGTTAATAAAAAGTCTATTAGAGAGTCGATAAAAACCTATTGCTGCTGATAGTTTCAAACCTAAGCGTAACGGATCATTTCGA

>EP2\_2La

GTGTAGTTGCCGGACGTTTGGCGCCAGTAGCTGTAGAAGTCGTACAAGCGCACCGTATCCGGCCGTCTGCCGGTCAGCATCGA  
ATTGCGGCTCGGTGCGCACAGAGCTTGCTGAAATGCATTGACGATGGGGTTTGGGAGGGAATTAATGAAAAAGGAACCAAGAA  
CCCTACTCCAATCGGTGCGCACAGAGCTTGCTGAAATGCATTGACGATGGGGTTTGGGAGGGAATAAATGAAAAAGGAACCAA  
GAACCCTACTCCAATCGTGCCTTACCTGTGCGAAAGCATTGTTGAAAGAAGAAACCTTGCTGCACCAGCCGATCGATGTTGAC  
CGTATGGCGTTACCATCGCCGTAGCCGTAATTTATCACCGGGCGAAAGTCATCCAAAATTATCAACAGTACGTTGGGCTGAT  
CCGGCGGTGCTTGTGTTGCGGTTGTGCTTATCAAAAAGGTTAAACAGAGCAAAGAAAGCAATAAACGCACCTTGCAACGCCAC  
ATTGTTTACGCTCTGACTGCGCAACTGGATGCAACGGAAGTTGAAACAAAAGTGATAACAATTGCGTCAACCGAGCTTGTGAA  
AGGAGTGCAAGAGGAATCACAACCGAAACAGGGGTTTTACATACGTCACATAACCCAAACAGATTGTTTCGATTTACGATGCTG  
GTCACGTTAATAAAAAGTCTATTAGAGAGTCGATAAAAACCTATTGCTGCTGATAGTTTCAAACCTAAGCGTAACGGATCATTTCG  
A

>ED1\_2La+

GGCGATCATGTGCGATCTTTACACAAAACAAATGAACCGTAAATTGATTAATTATATACCATGTCATGCTGACGAACAAACAGC  
CCGTCAGCATGGTACTTTCCCGATCGTCAACAGAATCCGGCCAGCTTGTGGCTAGTAAACAAACAGACGCCTATCAGAGC  
TGCTGTAATTTGTTCAAGATGAATGAATTGTTTACGAAACGTTTGGGCGTCAAACCACCACCTGTTGCTGACTAATAACACC

GCGCCGACGCGATACTACCGGAAAGGGAATGTCAAACCTGCCGACGTACAGCGCATCCGCCGTCTGCCCGTCCAGCGACTGT  
ACCAGCTGGCGGCAGCGTTTCGATGCAAAAAGCCGCGATCCAGATGATCGTGACGAAAGTGTGCGTTGGTATCGTTTGAGAAAGT  
CTACAGAAATTCAGAAATAGACAAAAAAAAAAGAATCATAATGGTATGTAAATGATTTTCGCTATCAACCAGCTGCCGCGCG  
CGGTCAAGTTCAAGCGTAACCGGATGGTTGGTCTGGTTTTTTTTTTGTGGGTGGTGAATTAGATCCATAAGGTTGCTATCCTTG  
CCCTCTCGCACCGGCGACATACTCGATGAGTCGCCATAGGCTCGACTCTTGATCCGGTT

>ED1\_2La

GGCGATCATGTGCGATCTTTACACAAACAAATGAACCTTAAATTGATTAATTATATGTCATGTCATGCTGACGTGCAAACAGC  
CCGCCAGCATGGTACTTTCCCGATCGTCAACAGAATCCGGCCAGCTTGTGGTGGCTAGCAAACAACCAGACGCCTATCAGAGC  
TGCTGTAATTTGTTCAAGATGAATGAATTGATTGACGAACCGTTGGGGTGTAAACCACCACCTGTTGCTGACTAATAACACC  
GCATTGACGCGATACTACCGGAAAGGGAATGTCAAACCTGCCGACGTACAGCGCATCCGCCGTCTGCCCGTCCAGCGACTGT  
ACCAGCTGGCGGCAGCGTTTCGATGCAAAAAGCCACGATCCAGATGATCGTGACGAAAGTGTGCGTTGGTATCGTTTGAGAAAGT  
CTACAGAAATTCAGAAATAGACAAAAAAAAAAGAATCATAATGGTATGTAAATGATTTTCGCTATCAACCAGCTGCTGCGCG  
CGGTCAAGATCAAGCGTAACCGGATGGTTGGTCTGGTTTTTTTCTTGTGTGGGTGGTGGATGAGATCCATAAGGTTGCTATCC  
TTGCCCTCTCGCACCGGCGACATACTCGATGAGTCGCCATAGGCTCGACTCTTGATCCGGTT

>ED2\_2La+

CCATTGCAGACCAGCTGTATCTCTTCTTGTAGATGTTTTCTAATCAAAGAATTATGAAAGAATAATTGAAATAAACTTACAA  
AGGCTCTTATTTTAACTAGACTTACCCGGCTTATAGAAGAACAGCGTTTTCTGTACGTTGGAAAATGGTATTTTCGATCAG  
CAGGCACATTAACGTCCCATAATGTACGCCAATACCAGCGTCGAGGAGGTAGAAAACAAGCTAAAAAAAACAATATGAAACAT  
TGAACATCCTTTCCTTCTTGTGGTTTTCTTCCCTCTGTCACTCACAATTCGCATATCGCTCACATAGATCGGCTGCCG  
GATGTTGCCAGCGTGACGCGTATCACAACAGATGGCACAGGAACACACAGTACGTACCTTGCCGAGTGGCCGAAAGATCG  
AATTATTCAGCGCCGTTTCGTAGAAAGCCTTTAAAATATGGAAAAGGAAAAAAAAACAAGACAATCGCTATCACCAGTCACTGGC  
GCTAGCAGAACCGTTTTCTGTACACTCACCCCAACACCGAACGCCAGCCGACGAACAGTACGCCGAAAAGTGCACCCAG  
AGATTCTTCGCCAGTGCCGCTAGGCCGCTATCCAGAGCGCGGGCTTTTCAAATCGTACGCATAAAATACGTACGCCGACAG  
CAGCAGGACGATTGCGGTGCGAAGCGATACGTACCAGAGCGTGCGAAAAGC

>ED2\_2La

CCATTGCAGACCAGCTGTATCTCTTCTTGTAGATGTTTTCTAATTAAGAAGAATAAAAGAATAATTGAAATAAGTTTAAAA  
AGGCTCTTATTTTAACTAGACATACCCGGCTTGTAGAAGAACAGCGTTTTCTGTACGTTGGAAAATGGTATTTTCGATCAG  
CAGGCACATTAACGTCCCATAATGTACGCCAGTACCAGCGTCGAGGAGGTTGACACAAGCTTAAAAACAATCAATATTAA  
ACATTTAACATCCTTTCCTTCTTGTGGTTCCCTTCCCTCTGTCACTCACAATTCGCATATCGCTCACATAGATCGGCT  
GCCGGATGTTGCCAGCGTGACGCGTATCACAACAGATGGCACAGGAACACACAGTACGTACCTTGCCGAGTGGCCGAAAG  
ATCGAATTATTCAGCGCCGTTTCGTAGAAAGCCTTTAAAATATGGAAAAGGAAAAAAAAACAAGGCAATCGCTATCACCAGTCACT  
GGCGTAGCAGAACCGTTTTCTTACACTCACCCCAACACCGAAGGCCAGCCGACGAACAGTACGCCGAAAAGTGCACCC  
CAGAGATTCTTCGCCAGTGCCGCGTAGGCCGCTATCCAGAGCGCGGGCTTTTCAAATCGTACGCATAAAATACGTACGCCGA  
CAGCAGCAGGACGATTGCGGTGCGAAGCGATACGTACCAGAGCGTGCGAAAAGC

>ED3\_2La+

GCAATGAAGCGTCGTACAGTGTGGGCTGTTGGAGTAATTTCAATACAGGAAAATAAATAAAAGGTCAACTATTTAACAACCTTC  
TCGTCCCAACGCTCACAGCGCGGCAAGTGTGTACCAACAATAGGGGAAACCCCAACAACCATTTGGTATATTTTGTTCCT  
CACAAACAACGGGCAGTTTGATAACGATGGAGCCAGCCGTTCCCTCAAAGAAGAAGATTGTTGATTTTTTATTTTATTTGCC  
TGCACATTATTGCTCTTATCTTGCAATACACCAATTGCATCATGCACACGATAAGACCGAAAAAAGCAAACAGCTTTGCC  
AACTCGCATCCCTCAAACAGCTGCCATTAATGGGGCAGAGCGAGCGTTGTAGCAAGTTATAGCAATCGTTAATCGACCTTCA  
AAACGGGTTTCGCTGGTAGGGGCCATTGCACGGGGTTTTGCTACCTCTCTTTCTCTCTTCTCTGTCCATCTCTTCGTAACA  
ATCAGTGCAATTGTTTGCGAACAGCACAGGAAATCAAGCATCATGTTTCGCAACTGATTTGCATTAGGTGTGACACACGATGAT  
GCTGTTTTTGTTCCTGTGAGAACATAAGGCAGCGC

>ED3\_2La

GCAATGAAGCGTCGTACAGTGTGGGCTGTTGGAGTAATTTCAATACAGGAAAATAAATAAAAGGTCAACTATTTAACAACCTTC

TCGTCCCAACGCTCACAGCGCGGCAAAGTGTGTACCAACAATAGGGGAAACCCCATCAACCATGTGGTGATATTTTGTTCCT  
CACAAACAAACGGGCAGTTTGATAACGATGGAGCCAGCCGTTCCCTCCAAGAAGAAGATTGTTGTATTTTTATTTTTATTTGCC  
TGCACATTATTGCTCTTATCTTGCAATACACCCAATTGCATCATAACACGATAAGACCGCAAAAAAAGCAAACAACCTTTGCC  
AATTCGCATCCCTCAAACAGTTCCCATTAATGGAGCAGAGCGAGCGTTGTAGCAAGTTATAGCAATCGTTAATCGACCTTCA  
AAACGGATGCGCTGGTAGGGGCCATTGCACGGGGTTTTGCTACCTCTCTTTCTCTCTTTCTCTGTCCATCTCTTCGTAACA  
ATCAGTGCAATTGTTTGCGAACAGCACAGGAAATCAAGCATCATGTTGCAACTGATTTGCATTAGGTGTGACACACGTTGAT  
GCTGTTTTTGTTCCTGTGAGAACATAAGGCAGCGC

>LRIM1\_ENH\_30142958\_30143475

AGTCACGAAAAGAAATGTGAAGTGGAACAGGAAGCACTAAAAGCAAAAAGGAAAAGCAACACACACCACCGAACATGCTGGAGA  
AAACAACAGCCTTCATTAATGGCCTGTTGCTCATTGCAGCCGTGGGTGGAAGGGTGGGAGTAGCCACCAGCGCCATGTGCGC  
CATTTCGTGGCAAACCGTCGTCGTCGGGCGGTGACTTCCGATTGGTTTTCGTGCAAATGTGTCTGCGTCATGCATCGTGCGATGT  
TTGATTGCGGACCAGTATATGGCCTCCCTCGCTCGCCGTTATGCAGGGTACTTCACTTCTCCATCTCCTTCATTGCCGCCTAG  
CGTTATCTGGAAGGCAGAGGGGAGAGAGATGGTCATGAGCCACACCCTAAAACAGAAGTCCCCATTCCATATTGTAACCCCGT  
TTTCGTTTGTTCGTCGGTTATTGTTGACAGACAAATAGTGCAAACAAATCGACGAAAACCCCGAAAGATTATCACAAC  
CACACACGTTTGCATGCTGA
